# RNA Profiling of Laser Microdissected Human Trophoblast Subtypes at Mid-Gestation Reveals a Role for Cannabinoid Signaling in Invasion

Matthew Gormley<sup>1-3</sup>, Oliver Oliverio<sup>1-3</sup>, Mirhan Kapidzic<sup>1-3</sup>, Katherine Ona<sup>1-3</sup>,  
Steven Hall<sup>1-3</sup> and Susan J. Fisher<sup>1-4\*</sup>

<sup>1</sup> Center for Reproductive Sciences, University of California, San Francisco, California 94143

<sup>2</sup> Department of Obstetrics, Gynecology, and Reproductive Sciences, University of California, San Francisco, California 94143

<sup>3</sup> Eli and Edythe Broad Center for Regeneration Medicine and Stem Cell Research, University of California, San Francisco, California 94143

<sup>4</sup> Department of Anatomy, University of California, San Francisco, California 94143

**\*Corresponding author:** S.J. Fisher, University of California, San Francisco, Box 0665 San Francisco, CA 94143. Tel. 415-476-5297, email: Susan.Fisher@ucsf.edu

## Author ORCID identifiers

0000-0003-2042-1534 **MG**; 0000-0001-9815-892X **OO**; 0000-0001-9723-402X **MK**; 0000-0003-2984-3784 **KA**; 0000-0002-5366-8931 **SH**; 0000-0001-7745-4850 **SJF**

**Disclosure:** SJF is a consultant for Novo Nordisk.

**Key words:** human, placenta, trophoblast, transcriptomics, proteomics, cannabinoid signaling

## Summary statement

Laser captured human trophoblasts were profiled (transcriptomic and proteomic), which showed that placental cells lining uterine arteries express CANNABINOID RECEPTOR 1. Functional analyses suggest that endogenous/exogenous cannabinoids could affect placentation.

## Abstract

Human placental architecture is complex. Its surface epithelium, specialized for transport, forms by fusion of cytotrophoblast progenitors into multinucleated syncytiotrophoblasts. Near the uterine surface, these progenitors assume a different fate, becoming cancer-like cells that invade its lining and blood vessels. The latter process physically

connects the placenta to the mother and shunts uterine blood to the syncytiotrophoblasts. Isolation of trophoblast subtypes is technically challenging. Upon removal, syncytiotrophoblasts disintegrate and invasive cytotrophoblasts are admixed with uterine cells. We used laser capture to circumvent these obstacles. This enabled isolation of syncytiotrophoblasts and two subpopulations of invasive cytotrophoblasts from cell columns and the endovascular compartment of spiral arteries. Transcriptional profiling revealed numerous genes whose placental or trophoblast expression was not known, including neurotensin and *C4ORF36*. Using mass spectrometry, discovery of differentially expressed mRNAs was extended to the protein level. We also found that invasive cytotrophoblasts expressed cannabinoid receptor 1. Unexpectedly, screening agonists and antagonists showed signals from this receptor promote invasion. Together these results revealed novel gene expression patterns that translate to the protein level. Our data also suggested that endogenous and exogenous cannabinoids can affect human placental development.

## Introduction

At birth, the human placenta is the newborn's largest organ (Pryce et al., 2014) compared to those of the body, its weight is approximately double that of the heaviest, the brain (Boyd and Hamilton, 1967). During the last six months of pregnancy, placental weight increases over seven-fold (Boyd and Hamilton, 1967) while simultaneously supporting over a thirty-fold increase in that of the fetus (Armitage et al., 1967).

The placenta's ability to transport the very substantial resources that are needed for its own growth and that of the embryo/fetus is enabled by its unique structure. Its surface area is increased by many orders of macroscopically visible branches—the chorionic villi. At term the total area in direct contact with maternal blood is estimated to be ~12 m<sup>2</sup> (Boyd, 1984). At an electron microscopic level, the syncytiotrophoblasts that form the outer surface of the villi are covered with branched microvilli, which substantially add to the surface area, by our estimate producing at least a 10-fold increase (Wislocki and Dempsey, 1955). Furthermore, the human placenta is hemochorial, *i.e.*, in direct contact with uterine blood, minimizing the cellular barriers between the maternal source of nutrients and oxygen, and the placental vasculature that carries these substances to the embryo/fetus.

At a cellular level, human placental structure is established by differentiation of its progenitor population, villous cytotrophoblasts (CTBs; diagrammed in **Fig. 1A and B**; reviewed in Maltepe and Fisher (Maltepe and Fisher, 2015)). In one pathway, the cells fuse producing multi-nucleated syncytiotrophoblasts (STBs). In the other pathway, the cells leave the placenta,

forming bridges, termed cell columns, that connect to the uterus and are the conduit for CTBs that invade its wall. The process is accompanied by a dramatic phenotypic switch in which the formerly epithelial cells adopt many vascular properties (Damsky and Fisher, 1998). Remarkably, these cells also breach uterine vessels that lie in their path. They penetrate the end of veins and migrate in a retrograde fashion up spiral arteries whose walls they occupy throughout much of their intrauterine segments. The latter process establishes the funnel-like structure of spiral arteries that reduces the flow rate and increases the volume of maternal blood perfusing the placenta.

The cellular structure of the human placenta makes isolation of the various trophoblast subtypes difficult-to-impossible. Upon enzyme dissociation, the syncytium disintegrates and extravillous CTBs are only a small fraction of the mononuclear cells that can be isolated. To solve this problem, we used laser microdissection (LMD) to capture STBs and column, endovascular or smooth CTBs as well as decidual cells for RNA profiling in the context of severe preeclampsia (Garrido-Gomez et al., 2017; Gormley et al., 2017). Here we used this approach to study the cells' gene expression during the 2<sup>nd</sup> trimester of normal pregnancy. The results revealed numerous molecules that were not previously known to be expressed by STBs and/or CTBs. Among them was the cannabinoid receptor 1 (CNR1), which was highly expressed by the endovascular CTB subpopulation. We went on to show that the downstream signals can influence invasion.

## Results

### RNA profiling of human trophoblast subtypes at mid-gestation

Blocks were prepared from biopsies of the 2<sup>nd</sup> trimester (15-20 weeks gestation) maternal-fetal interface. The focus was on areas that by macroscopic inspection included spiral arteries with dilated termini, a sign of CTB invasion. LMD enabled the capture of syncytium, cell columns and the endovascular compartment. The experimental strategy, which we used previously in an analysis of the same cell types from severe preeclampsia (Gormley et al., 2017), is depicted in **Fig. 1**. The dashed lines drawn on the photomicrographs to the left show the TB subpopulations that were targeted for removal as shown to the right: STBs (**Panels C and D**), cell column CTBs (CC; **Panels E and F**), and the endovascular compartment (ENDO), containing CTBs and other cell types in spiral arteries (SA; **Panels G and H**).

Global profiling of RNA isolated from the samples and pair-wise comparisons of the results revealed 2,986 genes that were differentially expressed (DE; adjP-value <0.05) by one of the TB subtypes. Principal component analysis (PCA; **Fig. S1**) showed that data from the same cell type clustered together separate from the other samples. Thus, consistent with their different functions, the various TB subtypes analyzed had distinct transcriptomes.

As compared to the two CTB subpopulations, 2708 genes were DE in STBs (**Fig. 2A**; see **Fig. S2** for entire heatmap and fold changes). As expected, the up regulated category included growth-promoting molecules (e.g., *GH2*, *AREG*, *CSHL1*, *INSL4*), numerous transporters (e.g., *SLC27A2*, *SLC26A7*), ion channels (e.g., *TRPV6*, *SCN7A*) and SYNCYTIN-2 (*ERVFRD-1*). The transcript for *MEOX2* was also DE in STBs, suggesting the possibility that this homeobox gene plays a role in fate specification or maintenance of this cell type. Unexpectedly, the expression of *LGR5*, a cell surface molecule that marks stem cells (e.g., intestinal and colonic; (Leung et al., 2018), was unique to STBs. Of interest was detection of the mRNA encoding neurotensin (NTS), raising the possibility that this small neuropeptide is released from the surface of the placenta into maternal blood during pregnancy where it seems likely that enteric and other effects are possible (Bugni and Pothoulakis, 2013).

With regard to cell column CTBs, 2070 genes were DE in this subpopulation (**Fig. 2B**; see **Fig. S2** for entire heatmap and fold changes). Receptors for metabolites were the most highly up regulated. They included *FABP7*. We previously described CTB expression of this molecule at the maternal-fetal interface (Winn et al., 2007). The alpha-ketoglutarate receptor (*OXGR1*) was highly expressed. This result suggested that CTBs might be using metabolic products in the basal plate as an energy source, which could couple the initial stages of invasion to maternal metabolism. As shown by our previous work (reviewed in Maltepe and Fisher (Maltepe and Fisher, 2015), molecules that are involved in adhesion/de-adhesion were up regulated in columns (*ITGB6*, *COL17A1*, *ACAN*, *VIT*). An mRNA encoding troponin I (*TNNI2*), a protein involved in muscle contraction, was DE, possible evidence of its involvement in movement of these cells through the columns and into the uterus. In accord with the dramatic phenotypic changes the cells undergo, the DNA demethylase, *TET1*, was up regulated, suggesting that alterations at the level of the epigenome might play a role in specifying the fate of this CTB population.

Overall, 2753 genes were DE in the endovascular compartment (**Fig. 2C**; see **Fig. S2** for entire heatmap and fold changes). The most highly up regulated molecules included the BMP4 antagonist, *CHRD1*, which mitigates migration and invasion of breast cancer cells (Cyr-Depauw et al., 2016), the secretory leukocyte peptidase inhibitor, *SLPI*, which plays a role in

host defense (Majchrzak-Gorecka et al., 2016) and a calcium channel involved in cell signaling (*TRPC4*), which promotes vessel relaxation and permeability (Freichel et al., 2004). We detected expression of molecules that could control leakage of blood from modified spiral arteries (*FGG*, *CP*) and the complement cascade (*CFH*, *C3*). To the best of our knowledge, this list included novel identifications: *OMB*, *RORB* and *MEDAG*. *CANNABINOID RECEPTOR 1* (*CNR1*) was also in this category, which raised the possibility that endogenous and exogenous cannabinoids could impact CTB invasion and remodeling of the uterine vasculature.

Finally, we detected expression of mRNAs that were indicative of contamination with other cell types, not unexpected because endovascular CTBs lie adjacent to the decidua, which expresses *RELAXIN* (Goldsmith and Weiss, 2009) and *PRL* (Jones et al., 1998) which we detected. NK cells infiltrate the walls of spiral arteries (Moffett and Colucci, 2015), which we found evidence for in the expression of molecules these immune cells produce, including *GZMA*, *KLRC1* and 3. We also detected molecules expressed by T cells (*TRDJ2*, *TRDC*).

In parallel, we have been developing a mass spectrometry (MS)-based proteomic method for analyzing the same TB subpopulations, captured by laser microdissection, which were the focus of the transcriptomic analysis. Given that typical estimates of correlations between mRNA and protein expression are below 50% (Maier et al., 2009; Vogel and Marcotte, 2012), we were interested in those that were significant at both levels, making them more likely to have functional effects. For these experiments, we employed a shotgun proteomic approach in which the number of times a peptide is identified enables relative quantification of the parent protein (*i.e.*, spectral counting; (Zhang et al., 2013)). In all, we showed that 108 DE mRNAs had similar relative protein abundances within STB, CTB, or ENDO (**Fig. S3**).

Examples of these data are shown in **Fig. 3**. The upper left hand panel illustrates the labeling scheme, which was subsequently omitted for the sake of simplification. Data are organized in columns. Molecules that were up regulated in STB are shown to the left, CTB in the middle and ENDO to the right. Each cell type is designated by a different bisected symbol (square, circle or diamond). Left or right shading denotes RNA or protein values, respectively, which is colored (green, blue or red) to aid interpretation.

With regard to STBs (**Fig. 3; left column**), CSHL1 was the most highly expressed DE molecule at both mRNA and protein levels. We validated translation of an open reading frame (*CHROMOSOME 4 OPEN READING FRAME 36; C4ORF36*). High placental levels of this mRNA (ENSG00000163633) have been reported (Fagerberg et al., 2014). Its fungal protein analog (MGG\_01005) is dynein light chain Tctex-type 1 (*dynlt1/3*) (Li et al., 2018), which

transports various types of cellular cargo. CYP19A1 and GH2 were also expressed at higher levels in the syncytium.

With regard to cell column CTBs (**Fig. 3; middle column**), the highly-expressed DE molecules included several novel identifications that, to our knowledge, were not known to be produced by the placenta. They included PANNEXIN-1 (a major ATP release and nucleotide efflux channel;(Chekeni et al., 2010; Elliott et al., 2009), PYROGLUTAMYL-PEPTIDASE I (an exopeptidase;(Cummins and O'Connor, 1998)) and LYMPHOCYTE ANTIGEN 6K (a biomarker of lung and esophageal carcinomas; (Ishikawa et al., 2007)). We were also interested to find a sialyltransferase (ALPHA-N-ACETYL GALACTOSAMINIDE ALPHA-2,6-SIALYLTRANSFERASE 6; (Samyn-Petit et al., 2000) was up regulated in this CTB subpopulation. Its identification may be related to the observation that placental proteins carry unusual forms of glycosylation not found on the same molecules produced by other cell types (McMaster et al., 1998).

With regard to the endovascular compartment (**Fig. 3; right column**), the highly-expressed DE molecules included the hydrolase, ACYLPHOSPHATASE-2, and FIBULIN-2, a secreted extracellular matrix glycoprotein that can stabilize the basement membranes of epithelial cells (Ibrahim et al., 2018). We also confirmed the DE expression of immune molecules: BUTYROPHILIN 3A2, which can inhibit T-cell activity as do other members of this family (Messal et al., 2011; Rhodes et al., 2016) and GALECTIN 3, which has numerous other functions, including a role in cell adhesion (Pugliese et al., 2015) and epithelial-stromal signaling (AbuSamra et al., 2019).

Next, we used Ingenuity Pathways Analysis (IPA) to infer functional similarities and differences among the TB subtypes. Pathways were assigned a z-score based on the predicted impact of DE genes, either activation (+) or deactivation (-). Those shown in **Fig. 4** were significantly over-represented (either positively or negatively) in all of the trophoblast subpopulations. Again, there was significant overlap between the *in silico* predictions of the pathways that were activated in STB and ENDO vs. column CTBs. It seems possible that this convergence could be driven, in part, by the fact that these two regions are in direct contact with maternal blood. In keeping with this theory, many of the pathways identified as potentially activated were involved in responding to signals from circulating molecules: corticotropin releasing hormone, relaxin, renin, angiotensin, NO, adrenomedullin, fatty acids (via PPAR, RXR), purines and pyrimidines (via P2Y receptors) or growth hormone. We also found potential positive regulation of pathways that are involved in neuronal functions, including synaptogenesis and CREB signaling. The STB and column CTB data suggested that these cells may be able to respond to cannabinoids; cell columns and endovascular compartments up regulated the



expression of genes that are involved in TH2 (tolerogenic) responses. A large number of unique pathways that were predicted to be activated solely by the endovascular trophoblasts and other cells types of the remodeled spiral arteries (ENDO). The putative pathways were involved in immune functions (acute phase signaling, dendritic cell maturation, IL-6, Tec kinase signaling or osteoarthritis), cell movement (colorectal cancer metastasis as well as G12/13, integrin and ILK signaling), MAPK signaling, vascular biology (cardiac hypertrophy) and prolactin responses.

Given that the gene expression data were specific to various trophoblast subtypes, we were interested in showing that the DE molecules had the expected immunolocalization patterns. With regard to STBs, we chose neurotensin, a small peptide gut hormone, with brain and nervous system effects including analgesia (Cordomi et al., 2016; Perez de Vega et al., 2018; Tschumi and Beckstead, 2019), which to our knowledge was not known to be produced by the human placenta. The immunolocalization signal for this molecule (**Fig. 5A-C**) was detected as a vesicular pattern in the syncytium at higher density in the apical region of the cells, suggesting possible release into the maternal circulation. Additionally, we were interested in the expression of C4orf36, also in STBs, whose peptide product was detected by mass spectrometry. Immunostaining revealed a dense punctate pattern in STBs (**Fig. 5D-F**). Within in the cell columns, we confirmed the expression of the peptidase PGPEP1 by the cytotrophoblasts in that region (**Fig. 5G-I**).

To begin to explore the role of CTB *CNR1*/CB1 within the uterine wall, we confirmed the cells' expression of this receptor by using antibody-based methods. Immunolocalization with an antibody that was specific for this antigen showed binding to a subset of CK-positive CTBs within the uterine wall and in the endovascular compartment (**Fig. 6A-C**). Immunoblotting with the same antibody detected a band of the expected molecular weight in CTB lysates (**Fig. 6D**).

Next, we measured the absolute amounts of the major mammalian endogenous cannabinoids, anandamide (AEA) and 2-arachidonoylglycerol (2-AG), in isolated CTBs and biopsies of the maternal-fetal interface that included invasive CTBs (**Fig. 6E**). AEA was detected (50-100 pg/10<sup>6</sup> cells) and 2-AG was present at much higher concentrations (1000-5000 pg/10<sup>6</sup> cells).

We then explored CB1 function in terms of CTB invasion. CB1 and 2 agonists and antagonists (see **Table S2**) were added to the assay. Among the compounds tested, only a CB1 agonist had a dose-dependent effect, increasing invasion (**Fig. 6F**).

## Discussion

Here we used a laser capture approach combined with analyses at RNA and protein levels to learn more about the biology of human trophoblast subtypes during the second trimester of pregnancy. Our focus was on cells that are difficult to isolate by other means. Thus, much of the existing data are from analysis of tissue samples in which the cell type of interest is only a relatively minor component (e.g., biopsies of the placenta or placental bed) or from *in vitro* models (e.g., cell lines) whose fidelity to the cognate cell type(s) *in vivo* is largely unproven. Global transcriptional profiling of microdissected syncytium, cell columns and endovascular compartments revealed many identifications that were expected in addition to those that were, to the best of our knowledge, novel.

With regard to STBs, we expected to detect, at RNA and protein levels, well known abundant products such as *CSHL1* (CHORIONIC SOMATOMAMMOTROPIN HORMONE-LIKE 1), *CYP19* (AROMATASE) and *GH2* (GROWTH HORMONE 2). We were also interested to find the expression of novel molecules such as neurotensin. Immunostaining for this molecule showed a vesicle-like pattern (**Fig. 5A-C**) with the stronger signal in the apical regions of the cells, suggesting release into maternal blood where the circulating molecule could induce systemic effects. Neurotensin was first isolated based on this peptide's ability to lower blood pressure (Carraway and Leeman, 1973). Later on, its role in promoting prolactin release and inhibiting LH secretion was discovered (McCann et al., 1982). Since then, other effects on the gut and brain have been described, which could account for a portion of the physiologic changes that occur during pregnancy (Bugni et al., 2012; Cordomi et al., 2016; Perez de Vega et al., 2018; Tschumi and Beckstead, 2019). It would be very interesting to assay levels of this peptide in normal pregnancy and pregnancy complications with vascular (e.g., preeclampsia) or GI (e.g., hyperemesis gravidarum) signs.

With regard to column CTBs, the highly-expressed DE molecules included PANNEXIN-1. To our knowledge, placental expression has not been described. The structure and diverse roles of the three mammalian pannexins was recently reviewed (Makarenkova et al., 2018; Penuela et al., 2013; Whyte-Fagundes and Zoidl, 2018). These gap junction hemichannels release relatively small amounts of ATP under steady state conditions, which can substantially increase in pathological situations. In parallel, their roles vary from protective to harmful. Within these broad categories are many functions that are relevant to the initial stages of CTB invasion in which the cells form aggregates (*i.e.*, columns) that connect the placenta to the uterus. In parallel, they execute an unusual differentiation program in which they transition from an epithelial to a vascular/mesenchymal phenotype. In keeping with the structural and functional



changes CTBs undergo in columns, PANNEXIN 1 has numerous physiologic functions, mediated by low levels of ATP release that could facilitate column formation such as promoting differentiation and survival. However, stressors such as mechanostimulation can ramp up these levels producing inflammation and pyroptotic cell death.

Other novel identifications, at mRNA and protein levels, were associated with column CTBs. They included PYROGLUTAMYL-PEPTIDASE I (*PGPEP1*), an exopeptidase (**Fig. 5G-I**) that cleaves N-terminal pyroglutamyl residues (Dando et al., 2003), a modification that protects many chemokines and peptide hormones (gastrin, thyrotropin releasing hormone and neurotensin) from degradation and inactivation. In this regard, it is interesting to note that column CTBs make an enzyme that degrades a STB product (e.g., neurotensin), suggesting that they might be immune to its effects. Other novel mRNAs/proteins that were up regulated in this population included LYMPHOCYTE ANTIGEN 6K (LY6K), which marks the progression of many cancers and has been implicated in immune escape (Upadhyay, 2019).

Trophoblasts within the endovascular compartment was notable for the expression of CANNABINOID RECEPTOR 1 (*CB1/CNR1*). The history of the endocannabinoid signaling field was recently reviewed (Maccarrone et al., 2015). Establishing the lipid,  $\Delta^9$  - tetrahydrocannabinol, as the psychoactive ingredient in cannabis enabled identification of a receptor, CB1, which was the entre into the signaling pathways this ligand activates. Subsequently, a second receptor (*CB2/CNR2*) was described and there may be others. The existence of an exogenous ligand led to the discovery of endogenous lipids that bind these receptors, e.g., AEA and 2-AG, which are produced from multiple membrane lipids whenever the need arises. In this regard, we used a mass spectrometry approach to quantify AED and 2-AG in isolated CTBs and biopsies of the maternal-fetal interface that included invasive CTBs. In both cases, 2-AG was the dominant species (**Fig. 6E**).

Most of the work on endocannabinoid signaling during pregnancy has been done in the mouse (reviewed in Sun and Dey (Sun and Dey, 2012)). On the maternal side, deletion of *Cnr1* and 2 reduces fertility secondary to impaired implantation due to heightened edema around the implantation site (Li et al., 2019). In contrast, prolongation of endocannabinoid signaling results in premature decidual aging and preterm birth (Sun et al., 2016). On the embryo side, aberrant endocannabinoid signaling triggers premature trophoblast stem cell differentiation, and consequently, impairs trophoblast invasion. As a result, fetal development is retarded (Sun et al., 2010).

Together these results suggest that this signaling system could play an important role in human placentation. Thus, we were interested to find that endovascular CTBs expressed *CNR1*. Analyses at the protein level showed widespread expression of this receptor among invasive CTBs. As a result, we asked whether agonists or antagonists impacted invasion, assayed by an *in vitro* model of this process. Unexpectedly, we found that a CB1 agonist substantially increased invasion. Of the many molecules whose functions we have tested in this system, very few have had this effect. Notably, perturbing integrin  $\alpha5/\beta1$  interactions with fibronectin also increased invasion suggesting that CTBs have systems for accelerating and braking invasion (Damsky et al., 1994). With regard to physiological regulators, we showed that uterine hypoxia, produced by aortic constriction, very significantly increases CTB invasion in the rhesus macaque (Zhou et al., 1993). Whether the parallel increases in cannabinoid signaling and invasion are related to either of these observations remains to be determined.

In summary, our laser microdissection/transcriptomic analysis of human STBs and invasive CTBs identified the expression of mRNAs encoding molecules known to be expressed by each cell type as well as novel transcripts that were also differentially expressed at the protein level. By using a mass spectrometry-based approach to validate DE molecules we also confirmed that *C4ORF36* is translated. Immunolocalization revealed a cytoplasmic staining pattern (**Fig. 5D-F**) that was consistent with the function of its fungal protein analog, dynein light chain, which is involved in intracellular transport (Li et al., 2018). We also showed that invasive CTBs express CB1/*CNR1*. Furthermore, endocannabinoid signaling in these cells appears to increase invasion, suggesting that this system may play the important role of facilitating deep placentation in human pregnancy. This finding raises the possibility that exogenous cannabinoids could also impact CTB invasion. Given the rapid rate of marijuana legalization in the US combined with the increased availability of synthetic cannabinoids with enhanced activity, the results of our study suggest that women should be cautioned against using these drugs during pregnancy.

## Materials and methods

### Tissue collection and preparation; CTB isolation

The UCSF Institutional Review Board (Committee on Human Research) approved this study. Written informed consent was obtained from all donors. Samples were processed within an hour of obtaining the tissue. Biopsies of the maternal-fetal interface were taken from four

placentas with gestational ages stratified across the second trimester (15, 17, 18 and 20 weeks, respectively). Spiral arteries from the same cases were identified using a dissection microscope (Leica MZ16). Biopsied specimens (1 x 1 x 0.5 cm) were rinsed in ice-cold PBS, transferred to a 1:1 (v:v) PBS:OCT (Optimal Cutting Temperature compound, Thermo Scientific) semi-frozen slurry for 15 minutes, oriented in an OCT-filled peel-a-way disposable embedding mold (Thermo Scientific) and frozen over a mixture of dry ice and ethanol. For immunolocalization, biopsies were fixed (3% paraformaldehyde in PBS [wt/vol]) and passed through a sucrose gradient (5, 10 and 15% in PBS). Then they were placed in a mold and frozen in OCT as described above. For immunoblotting, unfixed specimens were frozen in a mortar over dry ice, pulverized, and stored at -80°C.

CTBs were isolated from 2<sup>nd</sup> trimester placentas as previously described (Hunkapiller and Fisher, 2008). Briefly, chorionic villi were subjected to a series of enzymatic digestion steps that sequentially removed the outer STB layer and the underlying CTBs, which were isolated by centrifugation on a Percoll density gradient. Only cell preparations that were >80% pure as determined by cytokeratin staining were used in experiments.

### **Laser microdissection**

Frozen blocks were sectioned (-20°C) using a Leica CM3050 cryostat. Sections (20 µm) were mounted on different slides depending on the intended analysis. For subsequent RNA isolation, we used poly-L-lysine (Sigma Chemical Company) -coated, UV-treated, metal-frame, polyethylene naphthalate-membrane (PEN) slides (ThermoFisher Scientific). For subsequent protein isolation, we used poly-L-lysine treated DIRECTOR slides (Expression Pathology; (Hembrough et al., 2012). Slides with sections were kept under dry ice until LMD the same day. Sections on slides were manually defrosted in room air (30 sec), immersed in PBS until the OCT was completely removed (~2 min), dipped in 0.1% toluidine blue for 30 sec, washed in cold PBS, dehydrated (30 sec/treatment) in a graded ethanol series (75% x 2, 95%, 100%), then rapidly dried with compressed nitrogen. All solutions were made with nuclease-free reagents for RNA isolation or HPLC grade solutions for protein isolation in sterile single-use 50 mL conical tubes (Falcon). Regions of interest were identified using a 20x objective and circled on a touch-screen monitor (Wacom) coupled to a color camera (Leica DFC310 FX), which triggered a solid state UV laser (LMD 7000) enabling dissection (samples for RNA isolation) or rasterisation (samples for protein isolation) into a buffer-filled cap suspended immediately below. Buffer RLT Plus (Qiagen) was used for subsequent RNA isolation. An alkaline surfactant-containing solution (50 mM triethylammonium bicarbonate [Sigma], 5 mM tris[2-

carboxyethyl]phosphine [“Bond-Breaker,” ThermoFisher], and 0.1% [w/v] RapiGest SF [Waters]) was used for subsequent protein isolation.

For RNA, 10 slides with 4 sections per slide were prepared for each specimen. For protein, 5 slides with 8 sections per slide were prepared. To limit degradation, each slide used for RNA isolation was microdissected for no more than 30 minutes, which was extended to 1 hour for protein recovery. The regions of interest were collected into different caps and pooled across all 40 tissue sections.

### **RNA isolation**

Total RNA was isolated according to the manufacturer’s protocol (Qiagen RNeasy Plus Micro kit) with the added step of an on-column DNase digestion of bound RNA to avoid any DNA contamination. The concentration of total RNA was measured photometrically (NanoDrop 2000c). RNA integrity was determined via microfluidic phoresis (Agilent TapeStation). The samples were stored at -80°C prior to analysis.

### **Global RNA profiling**

We used a microarray approach (Affymetrix GeneChip HuGene 2.0 ST) and protocols that were devised by the UCSF Gladstone (NHLBI) Genomics Core Facility. Gene expression data quality was confirmed, RMA normalized (Bolstad et al., 2003; Irizarry et al., 2003; Wu et al., 2004) and summarized (oligo package) (Carvalho and Irizarry, 2010) in R/Bioconductor (Ihaka and Gentleman, 1996; RCoreTeam, 2013). The data were modeled and contrasts between STB, CTB and ENDO determined using the limma package (Ritchie et al., 2015). Differentially expressed genes (DEGs) had an absolute linear fold change  $\geq 2$  and an adjusted p value  $< 0.05$  for any pairwise comparison (STB versus CTB, STB versus ENDO, ENDO versus CTB). Four biological replicates of each subpopulation were analyzed (15, 17, 18 and 20 wks gestation). The data were deposited in GEO (accession number GSE156766).

### **Global protein profiling: trophoblast capture; protein isolation and digestion**

Three biological replicates of each cell type (STB, CTB and ENDO; 17, 18, and 20 wks gestation) were isolated by LMD from the same placentas that were subjected to global transcriptional profiling (see previous section). The samples were incubated in the alkaline surfactant-containing solution described above at 60°C with rigorous vortexing every 15 min for 1 h. Iodoacetamide (ThermoFisher) was added to 15 mM and incubated at room temperature in the dark for 30 min. Proteins were digested overnight at 37°C with trypsin (20 ng/μL, Pierce),

then centrifuged at 16,000 x g (Eppendorf) for 10 min. Trifluoroacetic acid (Pierce) was added to the supernatant such that the final concentration was 0.5%. Duplicate technical replicates were performed along with a control that consisted of a blank DIRECTOR slide that was carried through the entire sample preparation protocol.

### **Global protein profiling: identification, relative quantification and tandem assembly**

Using published methods (Branson and Freitas, 2016), each trypsin digestion was analyzed by reversed phase high performance liquid chromatography tandem mass spectrometry (RP HPLC MS/MS) using a nanoLC Ultra system (Eksigent Technologies) interfaced with a LTQ Orbitrap Velos mass spectrometer (ThermoScientific). Peptides were separated using an Acclaim PepMap100 C18 column (75  $\mu$ m i.d. x 15 cm, 3  $\mu$ m particle size, 100 Å pores, ThermoFisher) via mobile phase A (acetonitrile/water, 2:98, v/v, 0.1% formic acid) and mobile phase B (acetonitrile/water, 98:2, v/v, 0.1% formic acid) in conjunction with a linear gradient of 2-40% B over 90 min. The mobile phase flow rate was 550 nL/min. Using electrospray ionization, the LTQ Orbitrap Velos was operated in data-dependent acquisition mode for MS and MS/MS data collection. An initial survey scan was acquired (m/z 300-1500) in the Orbitrap analyzer at mass resolution 30,000, followed by collision-induced dissociation of precursor ions in the ion trap to produce MS/MS spectra for the 20 most abundant precursor ions. The instrument was operated with an isolation width of 3.0, normalized collision energy of 35, an ActQ of 0.25, and an MS/MS activation time of 10 ms.

The DEGs observed in the mRNA data were used to create a FASTA database of reviewed, canonical protein sequences (Pundir et al., 2017). Protein identification was accomplished by searching this database with the peptide MS/MS spectra using MS Amanda 2.0 and Sequest HT search algorithms (Proteome Discoverer, v2.2). The false discovery rate (FDR) was controlled by Percolator, a semi-supervised machine learning algorithm (Kall et al., 2007), using a target-decoy database strategy (Elias and Gygi, 2010). Criteria for identified proteins (IPs) included a minimum of two unique corresponding peptide spectra counted at least twice each, in two or more biological replicates, at an FDR < 0.10% (Proteome Discoverer, v2.2).

All subsequent analyses were done in R (Ihaka and Gentleman, 1996; RCoreTeam, 2013). The spectral counts were quantified (Branson and Freitas, 2016) and modeled using negative binomials (Robinson and Smyth, 2008). The differentially expressed proteins (STB versus CTB, STB versus ENDO, ENDO versus CTB) were identified using the exact test in

edgeR (Robinson et al., 2010)( $p < 0.05$ ). The coordinately differentially expressed genes and proteins were termed tandems.

All raw files are uploaded to the Center for Computational Mass Spectrometry, MassIVE (<https://massive.ucsd.edu>), dataset MSV000085995. Data uploads include the protein identification details.

### **Ingenuity Pathway Analysis**

The tandems for each trophoblast subtype were uploaded to Ingenuity Pathway Analysis (IPA) and a core expression analysis performed, followed by a comparison analysis of the results. A significant canonical pathway had a  $-\log(p\text{-value}) > 1.3$ , an absolute z-score  $> 2$ , and contained at least 4 tandems in a unique combination (no pathway redundancy).

### **Immunolocalization**

Portions of second trimester placentas that included anchoring chorionic villi were fixed in 3% paraformaldehyde for 30 min., washed three times in phosphate-buffered saline (PBS), infiltrated with 5 to 15% sucrose followed by OCT medium, and frozen in liquid nitrogen. Tissues were sectioned (10  $\mu\text{m}$ ) using a cryostat (Leica CM3050) and collected on charged glass slides (Fisher). The OCT was removed by washing in cold PBS. Nonspecific binding was inhibited by incubation for 30 min. with blocking buffer: 3% (w/v) bovine serum albumin (BSA), 0.1% cold fish skin gelatin, 0.1% Triton X-100 and 0.05% Tween 20 (Fisher Scientific) in PBS. Primary and secondary antibodies, their sources/catalogue numbers, the species in which they were raised and the concentrations used in the immunolocalization experiments are listed in **Table S1**. As to the general methods, a primary unconjugated antibody and rat anti-cytokeratin were diluted together in blocking buffer, incubated overnight with tissue sections in a humidified chamber at 4°C, washed (3 x 10 min.) in PBS, incubated with species-specific fluorescently tagged secondary antibodies and washed again in PBS. Mounting medium with 4',6-diamidino-2-phenylindole (DAPI; Vector Laboratories) was applied and the sections were coverslipped. Controls included omission of the primary or secondary antibody. The tissue sections were examined and images captured by using a confocal Leica DM5000 B microscope. Z-stacks were created in 1  $\mu\text{m}$  increments at 1024 x 1024 pixel resolution and line averaged 3 times.



## Immunoblotting

Proteins from isolated CTB cell pellets were solubilized in M-PER (Thermo) according to the manufacturer's protocol and protein concentrations determined spectrophotometrically (Shimadzu). Samples (5 µg) were electrophoretically separated on 4-12% Bis-Tris protein gels (1.5 mm, Invitrogen) and transferred to nitrocellulose membranes, followed by blocking for 1 h with 5% nonfat powdered milk in PBS-Tween-20 (0.1%) before incubating overnight at 4°C with primary antibody. Then the membranes were washed 3 times in PBS-Tween-20 and incubated with the appropriate species-specific secondary antibody for 1 h. Immunoreactive bands were detected with ECL 2 Western Blotting Substrate (Thermo Fisher Scientific, Pierce) and ECL high performance chemiluminescence film (Amersham, GE Healthcare). Equal sample loading in all the lanes was confirmed by anti- $\alpha$ -actin immunoreactivity.

## Mass spectrometry quantification of endogenous cannabinoids (anandamide and 2-arachidonoylglycerol).

Cell or tissue (maternal-fetal interface) samples were prepared using a Precellys 24 homogenizer with a Cryolys cooling unit (Bertin Technologies). Individual samples were placed in 2-ml vials with 10 vol water (10-fold dilution) and seven homogenization beads. Homogenization was conducted for three cycles (20 sec. each) at 5,000 rpm (with 30-sec. breaks) at < 10°C. Then 50 µl of each homogenized sample was pipetted into 13 × 100 mm tubes after which 150 µl of a deuterated internal standard solution were added, prior to vortexing for 1 min. and centrifugation (3000 xg) for 10 min.

Then the supernatant (5 µl) was separated on a Shimadzu Prominence UFLC system equipped with a binary pump and a SIL-20AC autosampler. Separation was achieved on a XBridge C18 column (4.6 × 50 mm). A gradient separation was used consisting of mobile phase A (0.05% H<sub>2</sub>O/5mM MNH<sub>4</sub> [15%]) and mobile phase B (ACN/2.5 mM MNH<sub>4</sub> [85%]) at a flow rate of 1.0 mL/min.

Mass spectrometric detection was performed using an Applied Biosystems/MDS SCIEX API 5000 triple quadrupole mass spectrometer, which was operated in multiple reaction monitoring (MRM) mode via the negative electrospray ionization interface using the transitions ( $m/z$ ) 379.4→287.4 for 2-AG (2-Arachidonoylglycerol), 386.4→293.4 for 2-AG-d8, 348.5→62.2 for AEA (anandamide), and 356.5→163.2 for AEA-d8. Data acquisition and quantitative processing were accomplished using Applied Biosystems Analyst version 1.5.1 software.

## **Invasion Assay**

Cytotrophoblasts (2<sup>nd</sup> trimester) were isolated according to methods described above. The cells (250,000) were plated in 500  $\mu$ l of DME H-21/2% Nutridoma on Matrigel-coated 24-well Transwell inserts (Costar) with 8.0 mm pores for 1 h. Nonadherent cells were removed by washing with warm medium before adding DME H-21/2% Nutridoma containing 1 or 10 ng/ml of a CB1 or CB2, agonist or antagonist, or the vehicle in which they were dissolved as a control (0.1% Tocrisolve, Tocris). The compounds and their activities are shown in **Table S2**. Each condition was tested in triplicate. After culturing for 72 h, the inserts were washed with PBS and fixed for 20 min in 3% PFA. They were stored at 4°C in PBS or immediately immunostained as described above with anti-cytokeratin 7. Then the membrane inserts were removed with surgical scissors and mounted on slides with DAPI-containing medium such that the underside of the membrane faced up. They were imaged with a fluorescent microscope (Leica DM3000B). The number of cytotrophoblast projections that reached the underside of the filter was counted and the data were expressed as experimental values relative to controls. The assay was done 3 times (biological replicates). Student's t-test ( $p < 0.05$ ) was used to determine significance.

## **Creation of graphics**

Tables and heat maps were constructed in Excel (Microsoft) and scatter and parallel plots were generated in OriginPro (OriginLabs).

## **Author contributions**

MG did the majority of the experiments, analyzed the data, prepared the figures and wrote a draft of the paper. OO helped with the laser capture of trophoblast subpopulation. MK isolated cytotrophoblasts. KO did a portion of the immunolocalization studies. SH helped with the mass spectrometry data analyses. SJF conceived of the study, designed the experiments, interpreted data and wrote the paper.

## **Acknowledgements**

We thank the clinical research coordinators, the patient participants, Norma McCormack for administrative support, and Drs. Michael McMaster and Steve Hall for careful reading and help with editing this manuscript. We are grateful to Dr. SK Dey for valuable advice on the function perturbation experiments. We thank Dr. Yong Huang for the mass spectrometry-small molecule analysis.

## Funding

This work was supported by the generosity of the National Institute of Health National Institute of Drug Abuse (NIDA) (1R21DA042951-01) to SJF.

## Data availability

Raw and normalized microarray data were deposited in the Gene Expression Omnibus (accession no. GSE156766). Raw and normalized mass spectrometry data were deposited in MassIVE (<https://massive.ucsd.edu>), dataset MSV000085995.

## References

- AbuSamra, D.B., Mauris, J., Argueso, P.**, 2019. Galectin-3 initiates epithelial-stromal paracrine signaling to shape the proteolytic microenvironment during corneal repair. *Sci Signal.* **12**.
- Armitage, P., Boyd, J.D., Hamilton, W.J., Rowe, B.C.**, 1967. A statistical analysis of a series of birth-weights and placental weights. *Hum Biol.* **39**, 430-444.
- Bolstad, B.M., Irizarry, R.A., Astrand, M., Speed, T.P.**, 2003. A comparison of normalization methods for high density oligonucleotide array data based on variance and bias. *Bioinformatics.* **19**, 185-193.
- Boyd, J.D., Hamilton, W.J.**, 1967. Development and structure of the human placenta from the end of the 3rd month of gestation. *J Obstet Gynaecol Br Commonw.* **74**, 161-226.
- Boyd, P.A.**, 1984. Quantitative structure of the normal human placenta from 10 weeks of gestation to term. *Early Hum Dev.* **9**, 297-307.
- Branson, O.E., Freitas, M.A.**, 2016. A multi-model statistical approach for proteomic spectral count quantitation. *J Proteomics.* **144**, 23-32.
- Bugni, J.M., Pothoulakis, C.**, 2013. Neurotensin, in: Kastin, A.J. (Ed.), Handbook of Biologically Active Peptides, second edition ed. Academic Press, Boston, pp. 1265-1270.
- Bugni, J.M., Rabadi, L.A., Jubbal, K., Karagiannides, I., Lawson, G., Pothoulakis, C.**, 2012. The neurotensin receptor-1 promotes tumor development in a sporadic but not an inflammation-associated mouse model of colon cancer. *Int J Cancer.* **130**, 1798-1805.
- Carraway, R., Leeman, S.E.**, 1973. The isolation of a new hypotensive peptide, neurotensin, from bovine hypothalami. *J Biol Chem.* **248**, 6854-6861.
- Carvalho, B.S., Irizarry, R.A.**, 2010. A framework for oligonucleotide microarray preprocessing. *Bioinformatics.* **26**, 2363-2367.
- Chekeni, F.B., Elliott, M.R., Sandilos, J.K., Walk, S.F., Kinchen, J.M., Lazarowski, E.R., Armstrong, A.J., Penuela, S., Laird, D.W., Salvesen, G.S., et al.**, 2010. Pannexin 1 channels mediate 'find-me' signal release and membrane permeability during apoptosis. *Nature.* **467**, 863-867.
- Cordomi, A., Fourmy, D., Tikhonova, I.G.**, 2016. Gut hormone GPCRs: structure, function, drug discovery. *Curr Opin Pharmacol.* **31**, 63-67.
- Cummins, P.M., O'Connor, B.**, 1998. Pyroglutamyl peptidase: an overview of the three known enzymatic forms. *Biochim Biophys Acta.* **1429**, 1-17.

- Cyr-Depauw, C., Northey, J.J., Tabaries, S., Annis, M.G., Dong, Z., Cory, S., Hallett, M., Rennhack, J.P., Andrechek, E.R., Siegel, P.M.,** 2016. Chordin-Like 1 Suppresses Bone Morphogenetic Protein 4-Induced Breast Cancer Cell Migration and Invasion. *Mol Cell Biol.* **36**, 1509-1525.
- Damsky, C.H., Fisher, S.J.,** 1998. Trophoblast pseudo-vasculogenesis: faking it with endothelial adhesion receptors. *Curr Opin Cell Biol.* **10**, 660-666.
- Damsky, C.H., Librach, C., Lim, K.H., Fitzgerald, M.L., McMaster, M.T., Janatpour, M., Zhou, Y., Logan, S.K., Fisher, S.J.,** 1994. Integrin switching regulates normal trophoblast invasion. *Development.* **120**, 3657-3666.
- Dando, P.M., Fortunato, M., Strand, G.B., Smith, T.S., Barrett, A.J.,** 2003. Pyroglutamyl-peptidase I: cloning, sequencing, and characterisation of the recombinant human enzyme. *Protein Expr Purif.* **28**, 111-119.
- Elias, J.E., Gygi, S.P.,** 2010. Target-decoy search strategy for mass spectrometry-based proteomics. *Methods Mol Biol.* **604**, 55-71.
- Elliott, M.R., Chekeni, F.B., Trampont, P.C., Lazarowski, E.R., Kadl, A., Walk, S.F., Park, D., Woodson, R.I., Ostankovich, M., Sharma, P., et al.,** 2009. Nucleotides released by apoptotic cells act as a find-me signal to promote phagocytic clearance. *Nature.* **461**, 282-286.
- Fagerberg, L., Hallstrom, B.M., Oksvold, P., Kampf, C., Djureinovic, D., Odeberg, J., Habuka, M., Tahmasebpoor, S., Danielsson, A., Edlund, K., et al.,** 2014. Analysis of the human tissue-specific expression by genome-wide integration of transcriptomics and antibody-based proteomics. *Mol Cell Proteomics.* **13**, 397-406.
- Freichel, M., Vennekens, R., Olausson, J., Hoffmann, M., Muller, C., Stolz, S., Scheunemann, J., Weissgerber, P., Flockerzi, V.,** 2004. Functional role of TRPC proteins in vivo: lessons from TRPC-deficient mouse models. *Biochem Biophys Res Commun.* **322**, 1352-1358.
- Garrido-Gomez, T., Dominguez, F., Quinonero, A., Diaz-Gimeno, P., Kapidzic, M., Gormley, M., Ona, K., Padilla-Iserte, P., McMaster, M., Genbacev, O., et al.,** 2017. Defective decidualization during and after severe preeclampsia reveals a possible maternal contribution to the etiology. *Proc Natl Acad Sci U S A.* **114**, E8468-E8477.
- Goldsmith, L.T., Weiss, G.,** 2009. Relaxin in human pregnancy. *Ann N Y Acad Sci.* **1160**, 130-135.
- Gormley, M., Ona, K., Kapidzic, M., Garrido-Gomez, T., Zdravkovic, T., Fisher, S.J.,** 2017. Preeclampsia: novel insights from global RNA profiling of trophoblast subpopulations. *Am J Obstet Gynecol.* **217**, 200 e201-200 e217.
- Hembrough, T., Thyparambil, S., Liao, W.L., Darfler, M.M., Abdo, J., Bengali, K.M., Taylor, P., Tong, J., Lara-Guerra, H., Waddell, T.K., et al.,** 2012. Selected Reaction Monitoring (SRM) Analysis of Epidermal Growth Factor Receptor (EGFR) in Formalin Fixed Tumor Tissue. *Clin Proteomics.* **9**, 5.
- Hunkapiller, N.M., Fisher, S.J.,** 2008. Chapter 12. Placental remodeling of the uterine vasculature. *Methods Enzymol.* **445**, 281-302.
- Ibrahim, A.M., Sabet, S., El-Ghor, A.A., Kamel, N., Anis, S.E., Morris, J.S., Stein, T.,** 2018. Fibulin-2 is required for basement membrane integrity of mammary epithelium. *Sci Rep.* **8**, 14139.
- Ihaka, R., Gentleman, R.R.,** 1996. R: Language for data analysis and graphics. *Journal of Computational Statistics.* **5**, 299-314.
- Irizarry, R.A., Hobbs, B., Collin, F., Beazer-Barclay, Y.D., Antonellis, K.J., Scherf, U., Speed, T.P.,** 2003. Exploration, normalization, and summaries of high density oligonucleotide array probe level data. *Biostatistics.* **4**, 249-264.

- Ishikawa, N., Takano, A., Yasui, W., Inai, K., Nishimura, H., Ito, H., Miyagi, Y., Nakayama, H., Fujita, M., Hosokawa, M., et al., 2007. Cancer-testis antigen lymphocyte antigen 6 complex locus K is a serologic biomarker and a therapeutic target for lung and esophageal carcinomas. *Cancer Res.* **67**, 11601-11611.
- Jones, R.L., Critchley, H.O., Brooks, J., Jabbour, H.N., McNeilly, A.S., 1998. Localization and temporal expression of prolactin receptor in human endometrium. *J Clin Endocrinol Metab.* **83**, 258-262.
- Kall, L., Canterbury, J.D., Weston, J., Noble, W.S., MacCoss, M.J., 2007. Semi-supervised learning for peptide identification from shotgun proteomics datasets. *Nat Methods.* **4**, 923-925.
- Leung, C., Tan, S.H., Barker, N., 2018. Recent Advances in Lgr5(+) Stem Cell Research. *Trends Cell Biol.* **28**, 380-391.
- Li, G., Huang, J., Yang, J., He, D., Wang, C., Qi, X., Taylor, I.A., Liu, J., Peng, Y.L., 2018. Structure based function-annotation of hypothetical protein MGG\_01005 from *Magnaporthe oryzae* reveals it is the dynein light chain orthologue of dynlt1/3. *Sci Rep.* **8**, 3952.
- Li, Y., Bian, F., Sun, X., Dey, S.K., 2019. Mice Missing *Cnr1* and *Cnr2* Show Implantation Defects. *Endocrinology.* **160**, 938-946.
- Maccarrone, M., Bab, I., Biro, T., Cabral, G.A., Dey, S.K., Di Marzo, V., Konje, J.C., Kunos, G., Mechoulam, R., Pacher, P., et al., 2015. Endocannabinoid signaling at the periphery: 50 years after THC. *Trends Pharmacol Sci.* **36**, 277-296.
- Maier, T., Guell, M., Serrano, L., 2009. Correlation of mRNA and protein in complex biological samples. *FEBS Lett.* **583**, 3966-3973.
- Majchrzak-Gorecka, M., Majewski, P., Grygier, B., Murzyn, K., Cichy, J., 2016. Secretory leukocyte protease inhibitor (SLPI), a multifunctional protein in the host defense response. *Cytokine Growth Factor Rev.* **28**, 79-93.
- Makarenkova, H.P., Shah, S.B., Shestopalov, V.I., 2018. The two faces of pannexins: new roles in inflammation and repair. *J Inflamm Res.* **11**, 273-288.
- Maltepe, E., Fisher, S.J., 2015. Placenta: the forgotten organ. *Annu Rev Cell Dev Biol.* **31**, 523-552.
- McCann, S.M., Vijayan, E., Koenig, J., Krulich, L., 1982. The effects of neurotensin on anterior pituitary hormone secretion. *Ann N Y Acad Sci.* **400**, 160-171.
- McMaster, M., Zhou, Y., Shorter, S., Kapasi, K., Geraghty, D., Lim, K.H., Fisher, S., 1998. HLA-G isoforms produced by placental cytotrophoblasts and found in amniotic fluid are due to unusual glycosylation. *J Immunol.* **160**, 5922-5928.
- Messal, N., Mamessier, E., Sylvain, A., Celis-Gutierrez, J., Thibult, M.L., Chetaille, B., Firaguay, G., Pastor, S., Guillaume, Y., Wang, Q., et al., 2011. Differential role for CD277 as a co-regulator of the immune signal in T and NK cells. *Eur J Immunol.* **41**, 3443-3454.
- Moffett, A., Colucci, F., 2015. Co-evolution of NK receptors and HLA ligands in humans is driven by reproduction. *Immunol Rev.* **267**, 283-297.
- Penuela, S., Gehi, R., Laird, D.W., 2013. The biochemistry and function of pannexin channels. *Biochim Biophys Acta.* **1828**, 15-22.
- Perez de Vega, M.J., Ferrer-Montiel, A., Gonzalez-Muniz, R., 2018. Recent progress in non-opioid analgesic peptides. *Arch Biochem Biophys.* **660**, 36-52.
- Pryce, J.E., Haile-Mariam, M., Goddard, M.E., Hayes, B.J., 2014. Identification of genomic regions associated with inbreeding depression in Holstein and Jersey dairy cattle. *Genet Sel Evol.* **46**, 71.
- Pugliese, G., Iacobini, C., Pesce, C.M., Menini, S., 2015. Galectin-3: an emerging all-out player in metabolic disorders and their complications. *Glycobiology.* **25**, 136-150.
- Pundir, S., Martin, M.J., O'Donovan, C., 2017. UniProt Protein Knowledgebase. *Methods Mol Biol.* **1558**, 41-55.
- R Core Team, 2013. R: A language and environment for statistical computing., R Foundation for Statistical Computing., Vienna, Austria, pp. <http://www.R-project.org/>.



- Rhodes, D.A., Reith, W., Trowsdale, J., 2016. Regulation of Immunity by Butyrophilins. *Annu Rev Immunol.* **34**, 151-172.
- Ritchie, M.E., Phipson, B., Wu, D., Hu, Y., Law, C.W., Shi, W., Smyth, G.K., 2015. limma powers differential expression analyses for RNA-sequencing and microarray studies. *Nucleic Acids Res.* **43**, e47.
- Robinson, M.D., McCarthy, D.J., Smyth, G.K., 2010. edgeR: a Bioconductor package for differential expression analysis of digital gene expression data. *Bioinformatics.* **26**, 139-140.
- Robinson, M.D., Smyth, G.K., 2008. Small-sample estimation of negative binomial dispersion, with applications to SAGE data. *Biostatistics.* **9**, 321-332.
- Samyn-Petit, B., Krzewinski-Recchi, M.A., Steelant, W.F., Delannoy, P., Harduin-Lepers, A., 2000. Molecular cloning and functional expression of human ST6GalNAc II. Molecular expression in various human cultured cells. *Biochim Biophys Acta.* **1474**, 201-211.
- Sun, X., Deng, W., Li, Y., Tang, S., Leishman, E., Bradshaw, H.B., Dey, S.K., 2016. Sustained Endocannabinoid Signaling Compromises Decidual Function and Promotes Inflammation-induced Preterm Birth. *J Biol Chem.* **291**, 8231-8240.
- Sun, X., Dey, S.K., 2012. Endocannabinoid signaling in female reproduction. *ACS Chem Neurosci.* **3**, 349-355.
- Sun, X., Xie, H., Yang, J., Wang, H., Bradshaw, H.B., Dey, S.K., 2010. Endocannabinoid signaling directs differentiation of trophoblast cell lineages and placentation. *Proc Natl Acad Sci U S A.* **107**, 16887-16892.
- Tschumi, C.W., Beckstead, M.J., 2019. Diverse actions of the modulatory peptide neurotensin on central synaptic transmission. *Eur J Neurosci.* **49**, 784-793.
- Upadhyay, G., 2019. Emerging Role of Lymphocyte Antigen-6 Family of Genes in Cancer and Immune Cells. *Front Immunol.* **10**, 819.
- Vogel, C., Marcotte, E.M., 2012. Insights into the regulation of protein abundance from proteomic and transcriptomic analyses. *Nat Rev Genet.* **13**, 227-232.
- Whyte-Fagundes, P., Zoidl, G., 2018. Mechanisms of pannexin1 channel gating and regulation. *Biochim Biophys Acta Biomembr.* **1860**, 65-71.
- Winn, V.D., Haimov-Kochman, R., Paquet, A.C., Yang, Y.J., Madhusudhan, M.S., Gormley, M., Feng, K.T., Bernlohr, D.A., McDonagh, S., Pereira, L., et al., 2007. Gene expression profiling of the human maternal-fetal interface reveals dramatic changes between midgestation and term. *Endocrinology.* **148**, 1059-1079.
- Wislocki, G.B., Dempsey, E.W., 1955. Electron microscopy of the human placenta. *Anat Rec.* **123**, 133-167.
- Wu, Z., Irizarry, R.A., Gentleman, R., Martinez-Murillo, F., Spencer, F., 2004. A model-based background adjustment of oligonucleotide expression arrays. *Journal of the American Statistical Association.* **99**, 909-917.
- Zhang, Y., Fonslow, B.R., Shan, B., Baek, M.C., Yates, J.R., 3rd, 2013. Protein analysis by shotgun/bottom-up proteomics. *Chem Rev.* **113**, 2343-2394.
- Zhou, Y., Chiu, K., Brescia, R.J., Combs, C.A., Katz, M.A., Kitzmiller, J.L., Heilbron, D.C., Fisher, S.J., 1993. Increased depth of trophoblast invasion after chronic constriction of the lower aorta in rhesus monkeys. *Am J Obstet Gynecol.* **169**, 224-229.



## Figures

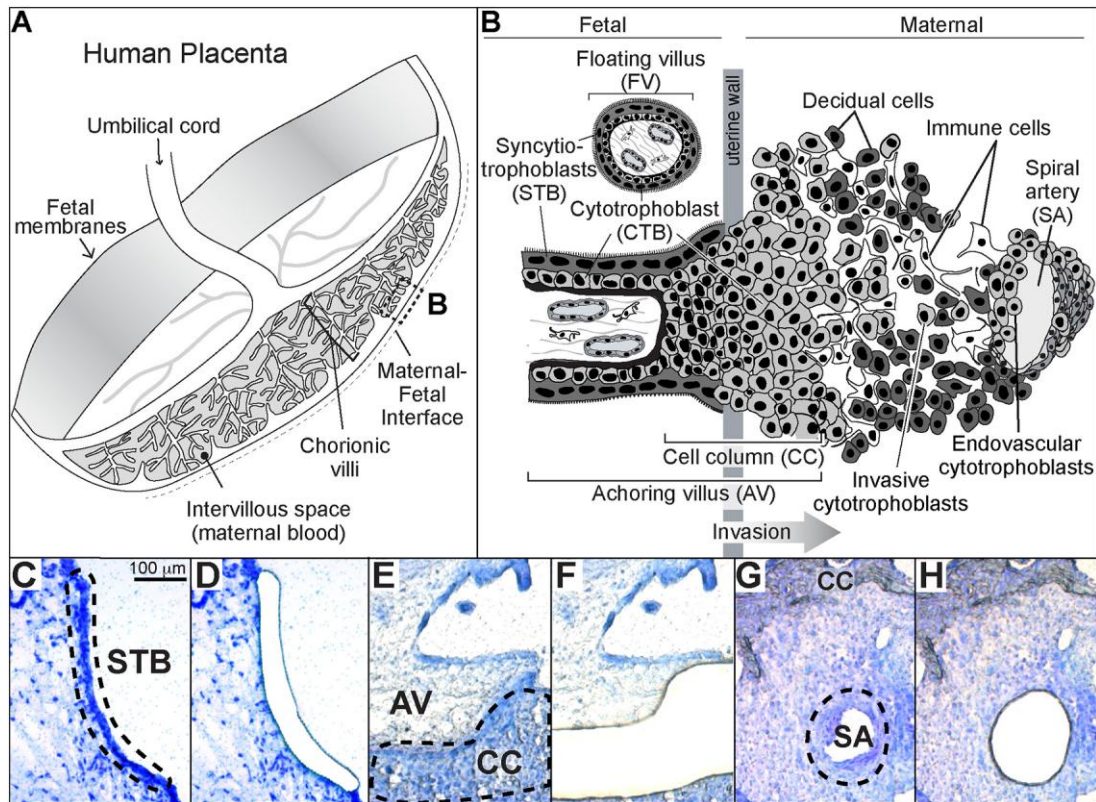

**Fig 1. Diagram and photomicrographs of the human placenta highlighting the trophoblast subtypes targeted for laser microdissection.** (A) Diagram of the human placenta in the second trimester of pregnancy. The *boxed area* indicates the region biopsied for these studies. (B) View of the maternal-fetal interface at the cellular level. Shown are the two classes of chorionic villi. Floating villi (FV), which are covered by multinucleated syncytiotrophoblasts (STB), transport substances between the mother and the embryo/fetus while producing growth factors and hormones essential to the unique symbiosis of pregnancy. Anchoring villi (AV), contain mononuclear cytotrophoblast progenitors that either fuse to form STBs or exit the placenta proper through cell columns (CCs) that attach the embryo/fetus to the uterus. Endovascular cytotrophoblasts mediate an increase in the terminal diameter of the maternal spiral arteries, enabling increase blood flow to the placenta. The arrow indicates the direction of trophoblast invasion (modified from Damsky *et al.*(Damsky et al., 1994)). (C-G) Photomicrographs taken before and after STB, CTB and ENDO were isolated using LMD. The sections were stained with toluidine blue, which enabled visualization of the cellular architecture. The dotted lines indicate the three trophoblast-containing regions that were targeted. Size bar = 100  $\mu$ m.

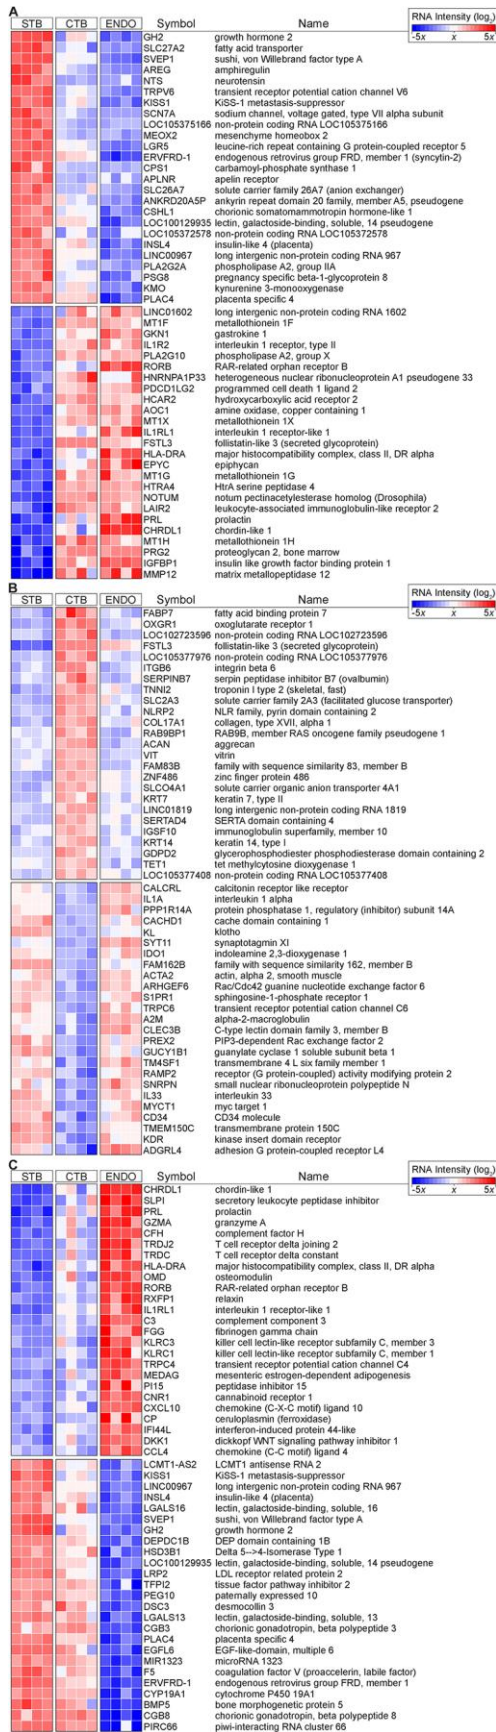

**Fig 2. Heat maps of differentially expressed STB, CTB and ENDO RNAs.** (A) The 25 most highly up regulated and 25 most highly down regulated transcripts in syncytiotrophoblasts (STB) compared to cytotrophoblasts (CTB) and endovascular cytotrophoblasts (ENDO) (total = 2708, **Table S2**). (B) Heat map of the most highly differentially expressed transcripts in CTB (total = 2070, **Table S2**) relative to STB and ENDO. (C) Heat map of the most highly differentially expressed transcripts in ENDO (total = 2753, **Table S2**) relative to STB and CTB. The data are displayed as a heat map showing the relative RNA fold change as a variation in color from blue (decreased expression) to white (average expression) to red (increased expression). Cells captured from four placentas were analyzed.

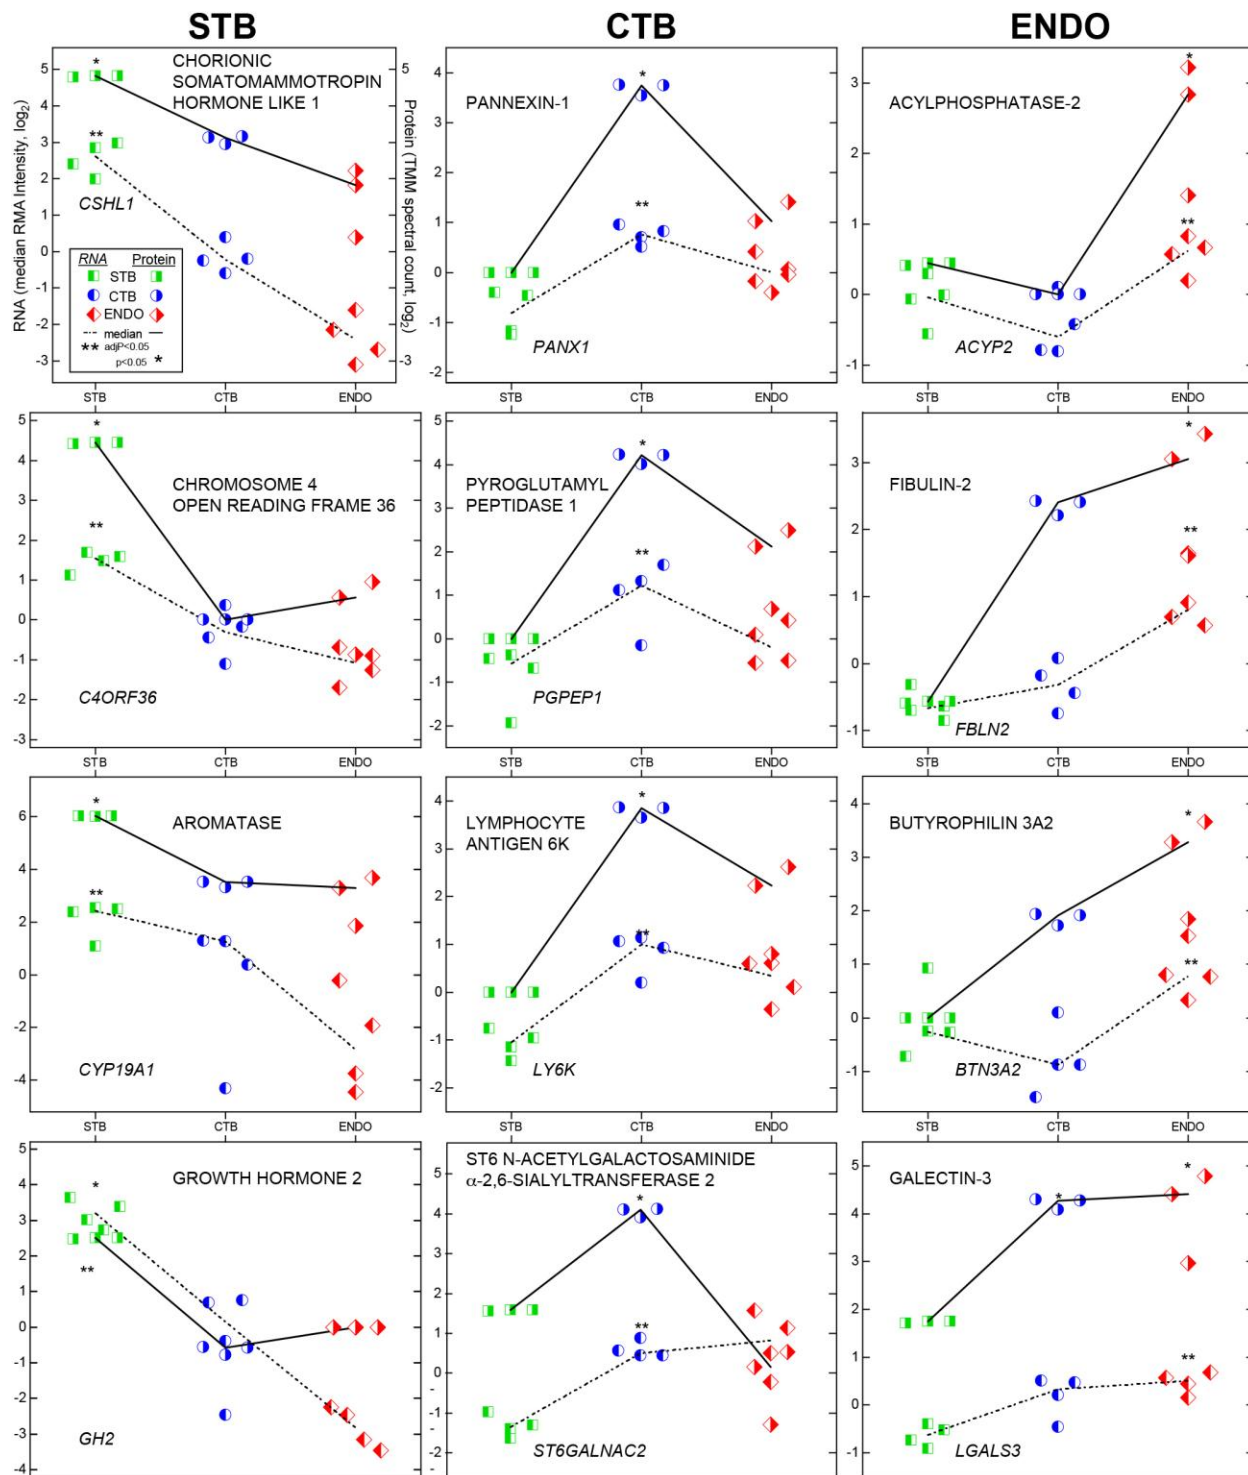

**Fig 3. Plots of relative RNA and protein abundances in the trophoblast subtypes analyzed.** The upper left hand panel illustrates the labeling scheme. Data are organized in columns. Molecules that were up regulated in STBs are shown to the left, cell column CTBs in the middle and endovascular CTBs to the right. Each cell type is designated by a different bisected symbol (square, circle or diamond). Left or right shading denotes RNA or protein values, respectively, which is colored (green, blue or red) to aid interpretation. RNA data were from four biological replicates, protein data were from three biological replicates.



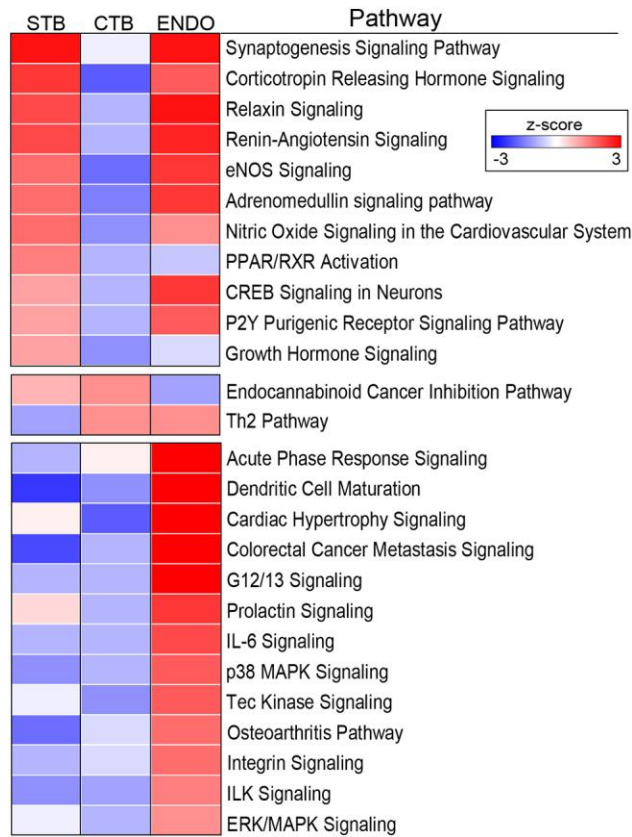

**Fig 4. Ingenuity Pathway Analysis of the differentially expressed genes among trophoblast subpopulations.** Pathways were assigned a z-score based on the predicted impact of DE genes, either activation (+) or deactivation (-). Significant pathways had a  $-\log(p\text{-value}) > 1.3$ , an absolute z-score  $> 2$ , and contained at least 4 members in a unique combination. The data are displayed as a heat map showing the z-score as a variation in color from blue (decreased expression) to red (increased expression) for each trophoblast subtype. The results were notable for the number signaling pathways that were identified.



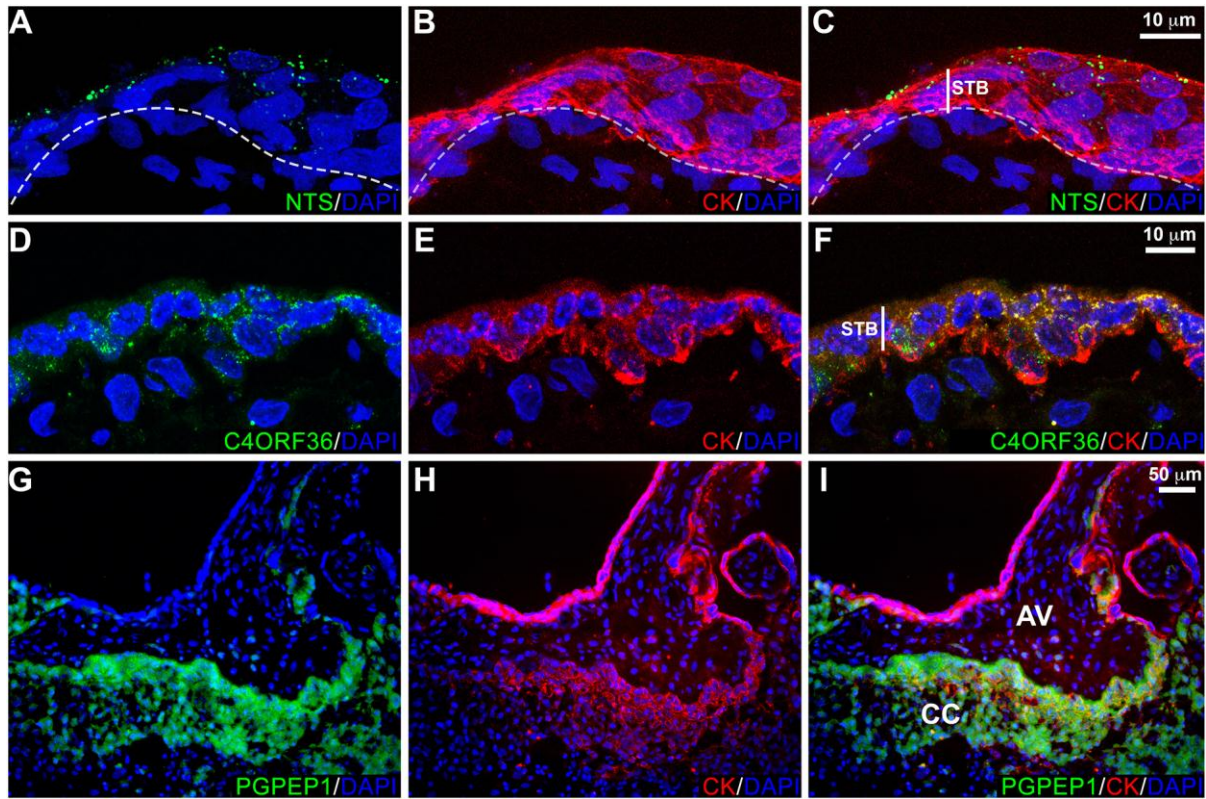

**Fig 5. Immunolocalization of differentially expressed proteins: neurotensin (NTS), C4ORF36, and Pyroglutamyl-Peptidase I (PGPEP1).** Tissue sections were immunostained for the antigen of interest and cytokeratin (CK), a trophoblast marker. Nuclei were localized with DAPI. Each panel was a confocal z-stack maximum intensity projection. (A-C) Neurotensin (NTS) was detected in a vesicular pattern localized to the apical region of syncytiotrophoblasts (STB). Within any one tissue section the vesicle density varied among regions although no areas lacked immunoreactivity. Furthermore, no differences based on gestational age were observed. (D-F) C4ORF36, which localized to STBs, had a uniformly dense punctate pattern. No variation was observed across the second trimester. (G-I) PGPEP1 was highly upregulated in cytotrophoblast columns (CC) of anchoring villi (AV). The results shown were represented of the immunostaining observed in a minimum of three biological replicates.

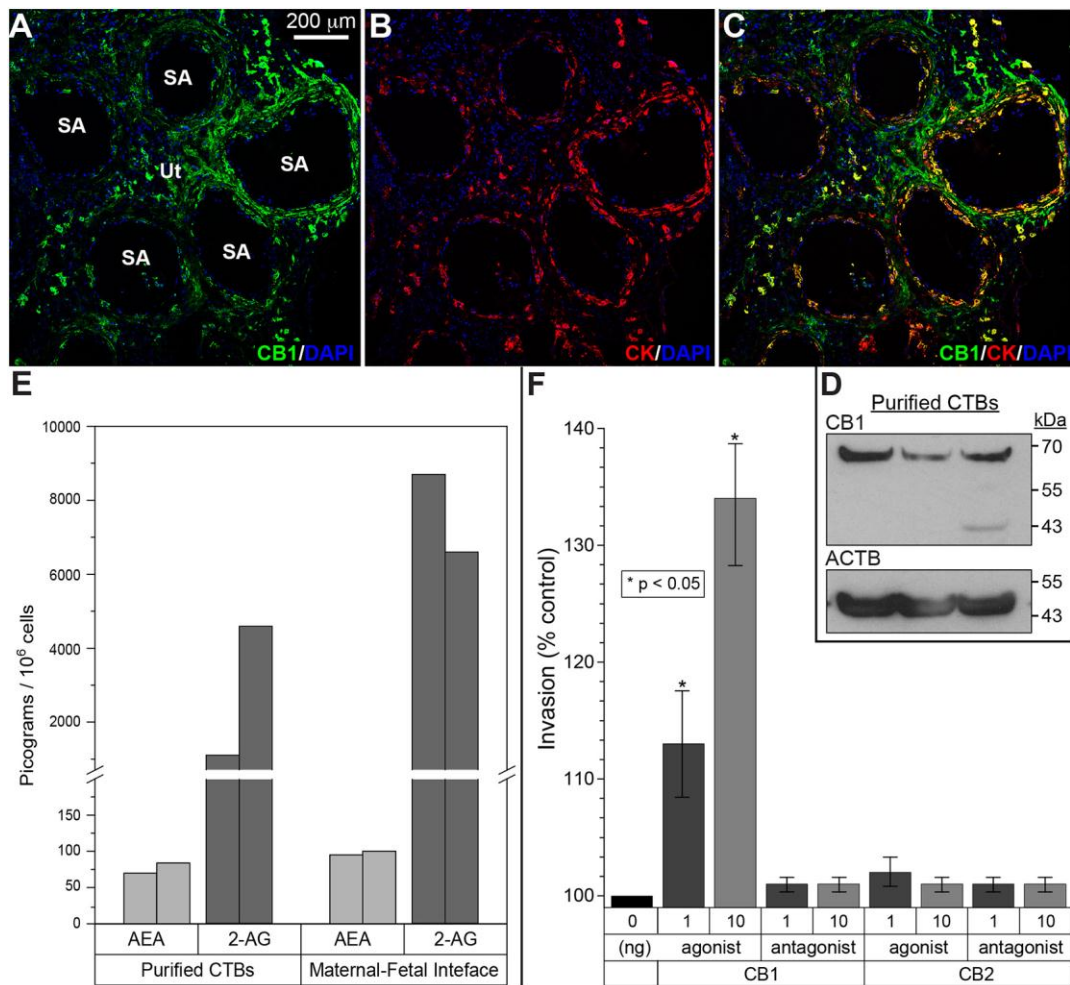

**Fig 6. Expression of cannabinoid ligands and receptors at the maternal fetal interface and the functional consequences.** (A-C) Tissue sections were immunostained for cannabinoid receptor 1 (CNR1)/CB1 and cytokeratin (CK), a trophoblast marker. Nuclei were localized with DAPI. Each panel was a confocal z-stack maximum intensity projection. Anti-CB1 specifically reacted with invasive/endovascular CTBs in the walls of uterine (Ut) spiral arteries (SA). Cytotrophoblasts in the cell columns showed variable CB1 expression, while syncytiotrophoblasts were negative (data not shown). The results shown were representative of the immunostaining observed in a minimum of three biological replicates. (D) Immunoblotting with the same antibody detected a band of the expected molecular weight in CTB lysates. Protein loading was estimated by immunoblotting with anti-actin-B (ACTB). Cells from three placentas were analyzed. (E) Mass spectrometry enabled measuring the absolute amounts of the major mammalian endogenous cannabinoids, anandamide (AED) and 2-arachidonoylglycerol (2-AG), in isolated CTBs and biopsies of the maternal-fetal interface that included invasive CTBs. The results from replicate samples are shown. (F) Among the CB1 and CB2 agonists and antagonists assayed, only a CB1 agonist had a dose-dependent effect increasing invasion ( $n=3$  biological replicates, \* = significance  $p < 0.05$ ).

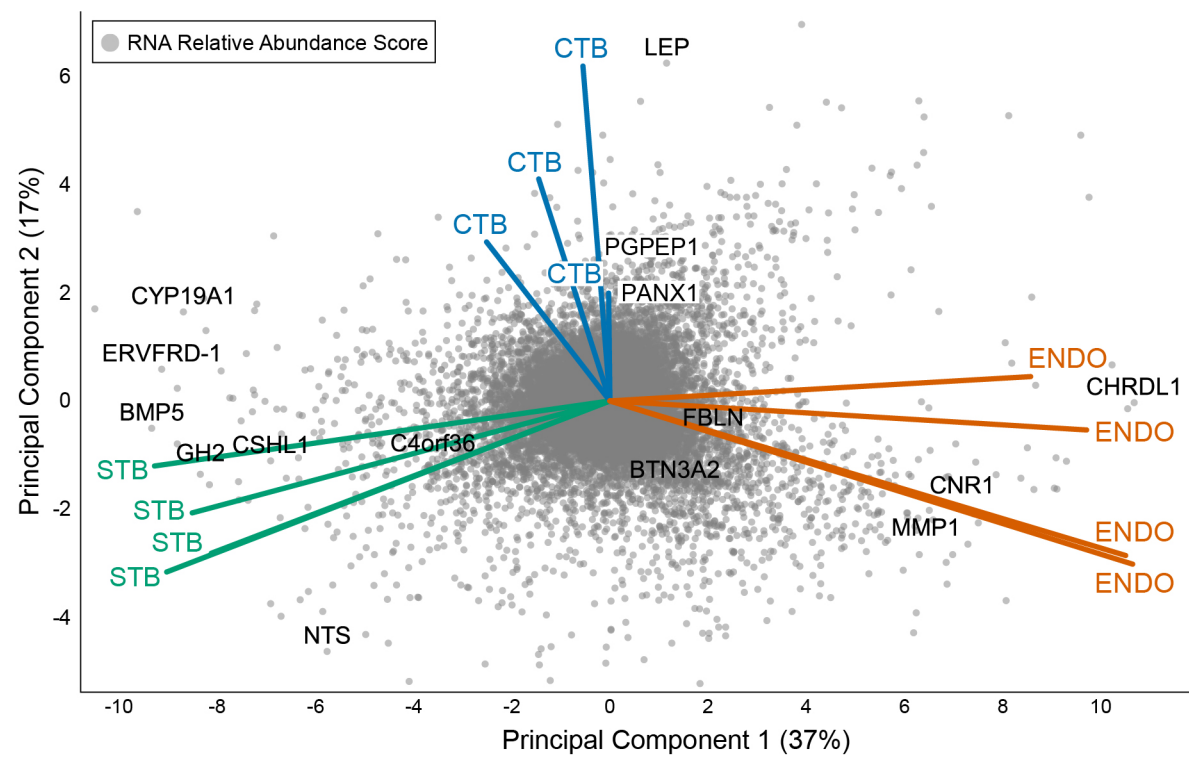

Fig. S1.

| S | C | E | Symbol       | Name                                                                            | Linear Fold Change |        |        |
|---|---|---|--------------|---------------------------------------------------------------------------------|--------------------|--------|--------|
|   |   |   |              |                                                                                 | S vs C             | S vs E | E vs C |
|   |   |   | ERVFRD-1     | endogenous retrovirus group FRD, member 1                                       | 3.5                | 77.7   | -21.9  |
|   |   |   | GH2          | growth hormone 2                                                                | 11.6               | 64.7   | -5.6   |
|   |   |   | SVEP1        | sushi, von Willebrand factor type A, EGF and pentraxin domain containing 1      | 9.3                | 57.8   | -6.2   |
|   |   |   | PLAC4        | placenta specific 4                                                             | 2.7                | 49.8   | -18.1  |
|   |   |   | KISS1        | KiSS-1 metastasis-suppressor                                                    | 9.0                | 44.5   | -4.9   |
|   |   |   | LGR5         | leucine-rich repeat containing G protein-coupled receptor 5                     | 8.1                | 41.2   | -5.1   |
|   |   |   | LOC100129935 | lectin, galactoside-binding, soluble, 14 pseudogene                             | 4.0                | 41.0   | -10.2  |
|   |   |   | LRP2         | LDL receptor related protein 2                                                  | 3.4                | 39.5   | -11.5  |
|   |   |   | TRPV6        | transient receptor potential cation channel, subfamily V, member 6              | 10.3               | 39.5   | -3.8   |
|   |   |   | INSL4        | insulin-like 4 (placenta)                                                       | 4.3                | 37.9   | -8.8   |
|   |   |   | PEG10        | paternally expressed 10                                                         | 2.3                | 34.2   | -15.0  |
|   |   |   | LINC00967    | long intergenic non-protein coding RNA 967                                      | 4.8                | 34.0   | -7.1   |
|   |   |   | DEPDC1B      | DEP domain containing 1B                                                        | 3.0                | 33.2   | -11.2  |
|   |   |   | CSHL1        | chorionic somatomammotropin hormone-like 1                                      | 6.6                | 30.7   | -4.7   |
|   |   |   | LCMT1-AS2    | LCMT1 antisense RNA 2                                                           | 4.0                | 29.6   | -7.4   |
|   |   |   | ANKRD20A5P   | ankyrin repeat domain 20 family, member A5, pseudogene                          | 8.0                | 27.7   | -3.5   |
|   |   |   | KMO          | kynurenine 3-monooxygenase (kynurenine 3-hydroxylase)                           | 5.4                | 26.6   | -5.0   |
|   |   |   | PSG8         | pregnancy specific beta-1-glycoprotein 8                                        | 5.4                | 26.5   | -4.9   |
|   |   |   | TCL6         | T-cell leukemia                                                                 | 3.6                | 24.3   | -6.8   |
|   |   |   | GABRE        | gamma-aminobutyric acid (GABA) A receptor, epsilon                              | 4.2                | 21.2   | -5.1   |
|   |   |   | LOC100128988 | uncharacterized LOC100128988                                                    | 4.4                | 21.1   | -4.8   |
|   |   |   | SEMA6A       | semaphorin 6A                                                                   | 4.4                | 18.5   | -4.2   |
|   |   |   | CRYBG1       | crystallin beta-gamma domain containing 1                                       | 3.3                | 18.2   | -5.5   |
|   |   |   | PSG9         | pregnancy specific beta-1-glycoprotein 9                                        | 4.2                | 17.3   | -4.1   |
|   |   |   | GPC3         | glypican 3                                                                      | 2.8                | 16.2   | -5.8   |
|   |   |   | LOC102724687 | uncharacterized LOC102724687                                                    | 3.8                | 15.7   | -4.1   |
|   |   |   | FAM184A      | family with sequence similarity 184, member A                                   | 2.1                | 15.0   | -7.3   |
|   |   |   | HSD17B1      | hydroxysteroid (17-beta) dehydrogenase 1                                        | 4.4                | 14.4   | -3.2   |
|   |   |   | PKIB         | protein kinase (cAMP-dependent, catalytic) inhibitor beta                       | 2.8                | 14.2   | -5.1   |
|   |   |   | ERV3-1       | endogenous retrovirus group 3, member 1                                         | 4.3                | 13.5   | -3.1   |
|   |   |   | MPP7         | membrane protein, palmitoylated 7                                               | 3.8                | 13.3   | -3.5   |
|   |   |   | EXPH5        | exophilin 5                                                                     | 2.4                | 13.3   | -5.6   |
|   |   |   | IGSF5        | immunoglobulin superfamily, member 5                                            | 3.4                | 12.1   | -3.6   |
|   |   |   | ABCG2        | ATP binding cassette subfamily G member 2 (Junior blood group)                  | 3.9                | 11.9   | -3.1   |
|   |   |   | SLC13A4      | solute carrier family 13 (sodium                                                | 5.2                | 11.8   | -2.3   |
|   |   |   | MICU3        | mitochondrial calcium uptake family, member 3                                   | 3.4                | 11.8   | -3.4   |
|   |   |   | SLC13A3      | solute carrier family 13 (sodium-dependent dicarboxylate transporter), member 3 | 3.5                | 11.2   | -3.2   |
|   |   |   | LINC00845    | long intergenic non-protein coding RNA 845                                      | 2.4                | 10.9   | -4.6   |
|   |   |   | HSD11B2      | hydroxysteroid (11-beta) dehydrogenase 2                                        | 3.8                | 10.9   | -2.9   |
|   |   |   | ESRRG        | estrogen-related receptor gamma                                                 | 2.9                | 10.8   | -3.7   |
|   |   |   | SLC43A2      | solute carrier family 43 (amino acid system L transporter), member 2            | 2.6                | 10.7   | -4.1   |
|   |   |   | LOC105370058 | uncharacterized LOC105370058                                                    | 3.0                | 10.4   | -3.5   |
|   |   |   | ANK3         | ankyrin 3, node of Ranvier (ankyrin G)                                          | 3.1                | 10.4   | -3.4   |
|   |   |   | LOC105369669 | uncharacterized LOC105369669                                                    | 3.3                | 10.4   | -3.2   |
|   |   |   | LOC105379298 | uncharacterized LOC105379298                                                    | 3.3                | 10.2   | -3.1   |
|   |   |   | TACC2        | transforming, acidic coiled-coil containing protein 2                           | 3.9                | 10.0   | -2.6   |
|   |   |   | PSG10P       | pregnancy specific beta-1-glycoprotein 10, pseudogene                           | 3.2                | 9.7    | -3.0   |
|   |   |   | SEMA6A-AS1   | SEMA6A antisense RNA 1                                                          | 3.2                | 9.5    | -2.9   |
|   |   |   | PLEKHA6      | pleckstrin homology domain containing, family A member 6                        | 2.9                | 9.3    | -3.2   |
|   |   |   | CKMT1B       | creatine kinase, mitochondrial 1B                                               | 2.8                | 9.0    | -3.2   |
|   |   |   | RYBP         | RING1 and YY1 binding protein                                                   | 2.1                | 8.3    | -4.0   |
|   |   |   | LOC255187    | uncharacterized LOC255187                                                       | 3.8                | 8.1    | -2.1   |
|   |   |   | MIR503HG     | MIR503 host gene                                                                | 3.1                | 7.9    | -2.6   |
|   |   |   | LOC105370057 | uncharacterized LOC105370057                                                    | 2.4                | 7.3    | -3.0   |
|   |   |   | ZFAT         | zinc finger and AT hook domain containing                                       | 2.2                | 7.2    | -3.3   |



| S | C | E | Symbol       | Name                                                                         | Linear Fold Change |        |        |
|---|---|---|--------------|------------------------------------------------------------------------------|--------------------|--------|--------|
|   |   |   |              |                                                                              | S vs C             | S vs E | E vs C |
|   |   |   | PLEKHH1      | pleckstrin homology domain containing, family H (with MyTH4 domain) member 1 | 2.7                | 7.1    | -2.6   |
|   |   |   | ARHGAP26     | Rho GTPase activating protein 26                                             | 3.1                | 7.0    | -2.3   |
|   |   |   | BPGM         | 2,3-bisphosphoglycerate mutase                                               | 2.9                | 6.8    | -2.4   |
|   |   |   | SLC22A3      | solute carrier family 22 (organic cation transporter), member 3              | 2.4                | 6.7    | -2.8   |
|   |   |   | NHSL1        | NHS-like 1                                                                   | 2.5                | 6.6    | -2.6   |
|   |   |   | PSG3         | pregnancy specific beta-1-glycoprotein 3                                     | 2.1                | 6.1    | -2.9   |
|   |   |   | GGH          | gamma-glutamyl hydrolase (conjugase, foylpolypolyglutamyl hydrolase)         | 2.5                | 6.1    | -2.4   |
|   |   |   | LOC105377029 | uncharacterized LOC105377029                                                 | 2.6                | 6.0    | -2.3   |
|   |   |   | SIAH1        | siah E3 ubiquitin protein ligase 1                                           | 2.7                | 5.9    | -2.2   |
|   |   |   | POGLUT3      | protein O-glucosyltransferase 3                                              | 2.5                | 5.6    | -2.3   |
|   |   |   | TBX3         | T-box 3                                                                      | 2.5                | 5.2    | -2.1   |
|   |   |   | GULP1        | GULP, engulfment adaptor PTB domain containing 1                             | 2.2                | 5.2    | -2.3   |
|   |   |   | NECTIN3      | nectin cell adhesion molecule 3                                              | 2.2                | 5.2    | -2.4   |
|   |   |   | KDM7A        | lysine (K)-specific demethylase 7A                                           | 2.5                | 5.1    | -2.0   |
|   |   |   | GRIP1        | glutamate receptor interacting protein 1                                     | 2.1                | 4.9    | -2.3   |
|   |   |   | ACADL        | acyl-CoA dehydrogenase, long chain                                           | 2.3                | 4.8    | -2.1   |
|   |   |   | MAN1C1       | mannosidase, alpha, class 1C, member 1                                       | 2.1                | 4.7    | -2.3   |
|   |   |   | ADRB1        | adrenoceptor beta 1                                                          | 2.1                | 4.7    | -2.2   |
|   |   |   | CAP2         | CAP, adenylate cyclase-associated protein, 2 (yeast)                         | 2.1                | 4.7    | -2.2   |
|   |   |   | LNPEP        | leucyl                                                                       | 2.3                | 4.6    | -2.0   |
|   |   |   | DUSP16       | dual specificity phosphatase 16                                              | 2.1                | 4.3    | -2.1   |
|   |   |   | TMEM150C     | transmembrane protein 150C                                                   | 12.7               | 2.6    | 4.9    |
|   |   |   | GUCY1B1      | guanylate cyclase 1 soluble subunit beta 1                                   | 10.9               | 2.5    | 4.3    |
|   |   |   | FAM162B      | family with sequence similarity 162, member B                                | 9.2                | 3.6    | 2.5    |
|   |   |   | KL           | klotho                                                                       | 8.4                | 3.4    | 2.5    |
|   |   |   | DACH1        | dachshund family transcription factor 1                                      | 6.5                | 2.9    | 2.3    |
|   |   |   | FSTL3        | follistatin-like 3 (secreted glycoprotein)                                   | -38.5              | -14.2  | -2.7   |
|   |   |   | SLC2A3       | solute carrier family 2 (facilitated glucose transporter), member 3          | -9.5               | -2.3   | -4.1   |
|   |   |   | ZNF486       | zinc finger protein 486                                                      | -7.4               | -2.8   | -2.7   |
|   |   |   | SLCO4A1      | solute carrier organic anion transporter family, member 4A1                  | -7.0               | -2.6   | -2.7   |
|   |   |   | CLDN19       | claudin 19                                                                   | -5.5               | -2.3   | -2.4   |
|   |   |   | CXCR6        | chemokine (C-X-C motif) receptor 6                                           | -5.1               | -2.0   | -2.5   |
|   |   |   | IL1RAP       | interleukin 1 receptor accessory protein                                     | -5.0               | -2.2   | -2.3   |
|   |   |   | SYT11        | synaptotagmin XI                                                             | 2.2                | -4.3   | 9.4    |
|   |   |   | HDGFL3       | HDGF like 3                                                                  | 2.4                | -2.4   | 5.8    |
|   |   |   | CHRD1        | chordin-like 1                                                               | -8.7               | -191.1 | 22.0   |
|   |   |   | PRL          | prolactin                                                                    | -10.3              | -150.8 | 14.7   |
|   |   |   | HLA-DRA      | major histocompatibility complex, class II, DR alpha                         | -7.8               | -74.8  | 9.6    |
|   |   |   | RORB         | RAR-related orphan receptor B                                                | -4.1               | -63.4  | 15.7   |
|   |   |   | IL1RL1       | interleukin 1 receptor-like 1                                                | -7.3               | -59.9  | 8.2    |
|   |   |   | IFI44L       | interferon-induced protein 44-like                                           | -3.4               | -31.5  | 9.1    |
|   |   |   | GKN1         | gastrokine 1                                                                 | -8.3               | -29.7  | 3.6    |
|   |   |   | F2R          | coagulation factor II (thrombin) receptor                                    | -4.2               | -23.1  | 5.5    |
|   |   |   | GPRC5B       | G protein-coupled receptor, class C, group 5, member B                       | -2.3               | -9.2   | 4.0    |
|   |   |   | TMEM45A      | transmembrane protein 45A                                                    | -2.1               | -8.5   | 4.1    |
|   |   |   | PDE6H        | phosphodiesterase 6H, cGMP-specific, cone, gamma                             | -2.5               | -6.2   | 2.4    |
|   |   |   | AREG         | amphiregulin                                                                 | 15.4               | 34.9   | ns     |
|   |   |   | SLC27A2      | solute carrier family 27 (fatty acid transporter), member 2                  | 18.4               | 31.6   | ns     |
|   |   |   | SCN7A        | sodium channel, voltage gated, type VII alpha subunit                        | 15.9               | 25.0   | ns     |
|   |   |   | NTS          | neurotensin                                                                  | 23.3               | 21.1   | ns     |
|   |   |   | MEOX2        | mesenchyme homeobox 2                                                        | 17.0               | 23.2   | ns     |
|   |   |   | SLC26A7      | solute carrier family 26 (anion exchanger), member 7                         | 11.3               | 21.1   | ns     |
|   |   |   | LOC105375166 | uncharacterized LOC105375166                                                 | 19.4               | 20.4   | ns     |
|   |   |   | SH3TC2       | SH3 domain and tetratricopeptide repeats 2                                   | 5.7                | 18.2   | ns     |
|   |   |   | APLNR        | apelin receptor                                                              | 18.1               | 14.2   | ns     |

| S | C | E | Symbol       | Name                                                                                     | Linear Fold Change |        |        |
|---|---|---|--------------|------------------------------------------------------------------------------------------|--------------------|--------|--------|
|   |   |   |              |                                                                                          | S vs C             | S vs E | E vs C |
|   |   |   | CPS1         | carbamoyl-phosphate synthase 1                                                           | 15.0               | 18.0   | ns     |
|   |   |   | PLA2G2A      | phospholipase A2, group IIA (platelets, synovial fluid)                                  | 8.5                | 17.5   | ns     |
|   |   |   | MIR4713      | microRNA 4713                                                                            | 4.3                | 16.9   | ns     |
|   |   |   | GSTA3        | glutathione S-transferase alpha 3                                                        | 6.2                | 16.5   | ns     |
|   |   |   | SNORD113-4   | small nucleolar RNA, C                                                                   | 5.7                | 16.2   | ns     |
|   |   |   | LOC105372578 | uncharacterized LOC105372578                                                             | 10.8               | 15.2   | ns     |
|   |   |   | LOC105369382 | uncharacterized LOC105369382                                                             | 6.6                | 15.0   | ns     |
|   |   |   | P2RY1        | purinergic receptor P2Y, G-protein coupled, 1                                            | 13.8               | 9.1    | ns     |
|   |   |   | SNORD113-5   | small nucleolar RNA, C                                                                   | 6.3                | 13.1   | ns     |
|   |   |   | LOC101927482 | uncharacterized LOC101927482                                                             | 12.7               | 7.7    | ns     |
|   |   |   | LINC00474    | long intergenic non-protein coding RNA 474                                               | 9.0                | 12.6   | ns     |
|   |   |   | HIGD1B       | HIG1 hypoxia inducible domain family, member 1B                                          | 12.2               | 8.4    | ns     |
|   |   |   | USP27X       | ubiquitin specific peptidase 27, X-linked                                                | 4.7                | 11.9   | ns     |
|   |   |   | ABCB1        | ATP binding cassette subfamily B member 1                                                | 11.7               | 11.0   | ns     |
|   |   |   | SNORD113-1   | small nucleolar RNA, C                                                                   | 6.9                | 11.4   | ns     |
|   |   |   | TTPA         | tocopherol (alpha) transfer protein                                                      | 8.4                | 11.3   | ns     |
|   |   |   | AGTR1        | angiotensin II receptor, type 1                                                          | 7.1                | 10.7   | ns     |
|   |   |   | LOC730101    | uncharacterized LOC730101                                                                | 6.9                | 10.7   | ns     |
|   |   |   | ZNF554       | zinc finger protein 554                                                                  | 4.1                | 10.6   | ns     |
|   |   |   | MUCL1        | mucin-like 1                                                                             | 10.1               | 9.9    | ns     |
|   |   |   | ISM1-AS1     | ISM1 antisense RNA 1                                                                     | 4.3                | 9.9    | ns     |
|   |   |   | GNGT1        | guanine nucleotide binding protein (G protein), gamma transducing activity polypeptide 1 | 4.1                | 9.8    | ns     |
|   |   |   | SMAGP        | small cell adhesion glycoprotein                                                         | 5.4                | 9.7    | ns     |
|   |   |   | ENDOU        | endonuclease, polyU-specific                                                             | 5.2                | 9.6    | ns     |
|   |   |   | CRISPLD1     | cysteine-rich secretory protein LCCL domain containing 1                                 | 8.7                | 9.6    | ns     |
|   |   |   | MIR181B1     | microRNA 181b-1                                                                          | 5.1                | 9.6    | ns     |
|   |   |   | LOC100128386 | uncharacterized LOC100128386                                                             | 5.4                | 9.5    | ns     |
|   |   |   | COX4I2       | cytochrome c oxidase subunit IV isoform 2 (lung)                                         | 9.5                | 8.5    | ns     |
|   |   |   | LOC100129345 | uncharacterized LOC100129345                                                             | 4.8                | 9.2    | ns     |
|   |   |   | SNHG24       | small nucleolar RNA host gene 24                                                         | 5.7                | 9.0    | ns     |
|   |   |   | PHYHIPL      | phytanoyl-CoA 2-hydroxylase interacting protein-like                                     | 5.3                | 8.9    | ns     |
|   |   |   | SNORD114-31  | small nucleolar RNA, C                                                                   | 3.5                | 8.9    | ns     |
|   |   |   | HSD17B2      | hydroxysteroid (17-beta) dehydrogenase 2                                                 | 8.8                | 4.1    | ns     |
|   |   |   | ADAMTS19     | ADAM metalloproteinase with thrombospondin type 1 motif 19                               | 8.6                | 4.0    | ns     |
|   |   |   | PCDH11X      | protocadherin 11 X-linked                                                                | 8.5                | 6.3    | ns     |
|   |   |   | CRHBP        | corticotropin releasing hormone binding protein                                          | 8.4                | 5.5    | ns     |
|   |   |   | IL22RA2      | interleukin 22 receptor, alpha 2                                                         | 4.9                | 8.3    | ns     |
|   |   |   | ZNF91        | zinc finger protein 91                                                                   | 5.1                | 8.2    | ns     |
|   |   |   | FRAS1        | Fraser extracellular matrix complex subunit 1                                            | 5.4                | 8.0    | ns     |
|   |   |   | COLEC10      | collectin sub-family member 10 (C-type lectin)                                           | 6.4                | 7.9    | ns     |
|   |   |   | EGFEM1P      | EGF-like and EMI domain containing 1, pseudogene                                         | 7.7                | 6.8    | ns     |
|   |   |   | GCNT4        | glucosaminyl (N-acetyl) transferase 4, core 2                                            | 7.7                | 5.1    | ns     |
|   |   |   | TRIM40       | tripartite motif containing 40                                                           | 3.6                | 7.7    | ns     |
|   |   |   | TBX5         | T-box 5                                                                                  | 5.5                | 7.7    | ns     |
|   |   |   | LOC105376429 | uncharacterized LOC105376429                                                             | 3.1                | 7.0    | ns     |
|   |   |   | LINC01336    | long intergenic non-protein coding RNA 1336                                              | 6.9                | 6.1    | ns     |
|   |   |   | RAB38        | RAB38, member RAS oncogene family                                                        | 6.8                | 3.8    | ns     |
|   |   |   | EPHA3        | EPH receptor A3                                                                          | 5.3                | 6.7    | ns     |
|   |   |   | SNORD114-28  | small nucleolar RNA, C                                                                   | 6.3                | 6.7    | ns     |
|   |   |   | MINDY4B      | MINDY family member 4B                                                                   | 3.4                | 6.6    | ns     |
|   |   |   | LOC100507661 | uncharacterized LOC100507661                                                             | 5.7                | 6.5    | ns     |
|   |   |   | SLC6A4       | solute carrier family 6 (neurotransmitter transporter), member 4                         | 4.1                | 6.4    | ns     |
|   |   |   | CLRN1        | clarin 1                                                                                 | 3.9                | 6.3    | ns     |
|   |   |   | MAP7D2       | MAP7 domain containing 2                                                                 | 3.6                | 6.3    | ns     |
|   |   |   | MIR181A1HG   | MIR181A1 host gene                                                                       | 4.0                | 6.3    | ns     |



| S | C | E | Symbol       | Name                                                                    | Linear Fold Change |        |        |
|---|---|---|--------------|-------------------------------------------------------------------------|--------------------|--------|--------|
|   |   |   |              |                                                                         | S vs C             | S vs E | E vs C |
|   |   |   | MTMR10       | myotubularin related protein 10                                         | 3.7                | 6.2    | ns     |
|   |   |   | LINC01118    | long intergenic non-protein coding RNA 1118                             | 3.1                | 6.2    | ns     |
|   |   |   | ACSS1        | acyl-CoA synthetase short-chain family member 1                         | 4.5                | 6.1    | ns     |
|   |   |   | C4orf36      | chromosome 4 open reading frame 36                                      | 3.5                | 6.1    | ns     |
|   |   |   | LINC02365    | long intergenic non-protein coding RNA 2365                             | 4.0                | 6.1    | ns     |
|   |   |   | CCDC102B     | coiled-coil domain containing 102B                                      | 6.1                | 3.8    | ns     |
|   |   |   | ADAMTS18     | ADAM metalloproteinase with thrombospondin type 1 motif 18              | 4.5                | 5.9    | ns     |
|   |   |   | MED12L       | mediator complex subunit 12 like                                        | 3.2                | 5.9    | ns     |
|   |   |   | AFF2         | AF4                                                                     | 5.8                | 5.7    | ns     |
|   |   |   | HSPA4L       | heat shock 70kDa protein 4-like                                         | 5.2                | 5.8    | ns     |
|   |   |   | AHR          | aryl hydrocarbon receptor                                               | 3.5                | 5.8    | ns     |
|   |   |   | NRCAM        | neuronal cell adhesion molecule                                         | 5.7                | 3.7    | ns     |
|   |   |   | SLC20A1      | solute carrier family 20 (phosphate transporter), member 1              | 3.8                | 5.7    | ns     |
|   |   |   | HS6ST2       | heparan sulfate 6-O-sulfotransferase 2                                  | 4.9                | 5.7    | ns     |
|   |   |   | SERPINB2     | serpin peptidase inhibitor, clade B (ovalbumin), member 2               | 5.0                | 5.6    | ns     |
|   |   |   | CROT         | camitine O-octanoyltransferase                                          | 2.9                | 5.6    | ns     |
|   |   |   | FAM3B        | family with sequence similarity 3, member B                             | 3.1                | 5.4    | ns     |
|   |   |   | TCHH         | trichohyalin                                                            | 2.7                | 5.4    | ns     |
|   |   |   | MEG3         | maternally expressed 3 (non-protein coding)                             | 2.9                | 5.4    | ns     |
|   |   |   | SLC16A12     | solute carrier family 16, member 12                                     | 4.2                | 5.3    | ns     |
|   |   |   | CADM3        | cell adhesion molecule 3                                                | 4.0                | 5.3    | ns     |
|   |   |   | PMAIP1       | phorbol-12-myristate-13-acetate-induced protein 1                       | 3.0                | 5.3    | ns     |
|   |   |   | LOC105375161 | uncharacterized LOC105375161                                            | 4.0                | 5.3    | ns     |
|   |   |   | ARHGAP42     | Rho GTPase activating protein 42                                        | 5.3                | 4.9    | ns     |
|   |   |   | IGHA1        | immunoglobulin heavy constant alpha 1                                   | 5.0                | 5.2    | ns     |
|   |   |   | WNT2         | wingless-type MMTV integration site family member 2                     | 3.0                | 5.2    | ns     |
|   |   |   | FLJ90680     | FLJ90680 protein                                                        | 3.7                | 5.1    | ns     |
|   |   |   | VXN          | vexin                                                                   | 3.2                | 5.1    | ns     |
|   |   |   | TMEM133      | transmembrane protein 133                                               | 4.2                | 5.0    | ns     |
|   |   |   | GPR183       | G protein-coupled receptor 183                                          | 5.0                | 3.2    | ns     |
|   |   |   | AGPAT5       | 1-acylglycerol-3-phosphate O-acyltransferase 5                          | 4.1                | 5.0    | ns     |
|   |   |   | TWIST1       | twist family bHLH transcription factor 1                                | 4.5                | 5.0    | ns     |
|   |   |   | ISM1         | isthmin 1, angiogenesis inhibitor                                       | 3.8                | 4.9    | ns     |
|   |   |   | LOC101927139 | uncharacterized LOC101927139                                            | 4.9                | 3.4    | ns     |
|   |   |   | MIR181A1     | microRNA 181a-1                                                         | 4.9                | 4.6    | ns     |
|   |   |   | SEMA3B       | semaphorin 3B                                                           | 3.2                | 4.8    | ns     |
|   |   |   | PART1        | prostate androgen-regulated transcript 1 (non-protein coding)           | 3.3                | 4.8    | ns     |
|   |   |   | PTPRD        | protein tyrosine phosphatase, receptor type, D                          | 4.8                | 3.4    | ns     |
|   |   |   | OTOGL        | otogelin-like                                                           | 3.3                | 4.8    | ns     |
|   |   |   | CSTA         | cystatin A (stefin A)                                                   | 4.8                | 4.6    | ns     |
|   |   |   | NRAD1        | non-coding RNA in the aldehyde dehydrogenase 1A pathway                 | 3.8                | 4.8    | ns     |
|   |   |   | MPP1         | membrane protein, palmitoylated 1                                       | 4.8                | 3.6    | ns     |
|   |   |   | AFF1         | AF4                                                                     | 2.6                | 4.7    | ns     |
|   |   |   | ITGA9        | integrin alpha 9                                                        | 4.7                | 2.7    | ns     |
|   |   |   | BLID         | BH3-like motif containing, cell death inducer                           | 3.9                | 4.7    | ns     |
|   |   |   | SEL1L3       | sel-1 suppressor of lin-12-like 3 (C. elegans)                          | 4.7                | 3.1    | ns     |
|   |   |   | ARHGAP28     | Rho GTPase activating protein 28                                        | 4.7                | 4.3    | ns     |
|   |   |   | CKMT1A       | creatine kinase, mitochondrial 1A                                       | 3.1                | 4.6    | ns     |
|   |   |   | RFX6         | regulatory factor X, 6                                                  | 4.6                | 4.6    | ns     |
|   |   |   | SNORD114-25  | small nucleolar RNA, C                                                  | 3.9                | 4.6    | ns     |
|   |   |   | MYLIP        | myosin regulatory light chain interacting protein                       | 2.5                | 4.6    | ns     |
|   |   |   | CCK          | cholecystokinin                                                         | 3.0                | 4.6    | ns     |
|   |   |   | HACE1        | HECT domain and ankyrin repeat containing E3 ubiquitin protein ligase 1 | 3.3                | 4.5    | ns     |
|   |   |   | CADM3-AS1    | CADM3 antisense RNA 1                                                   | 3.3                | 4.5    | ns     |
|   |   |   | PRKCZ        | protein kinase C, zeta                                                  | 2.6                | 4.5    | ns     |

| S | C | E | Symbol       | Name                                                                          | Linear Fold Change |        |        |
|---|---|---|--------------|-------------------------------------------------------------------------------|--------------------|--------|--------|
|   |   |   |              |                                                                               | S vs C             | S vs E | E vs C |
|   |   |   | SH3BGRL2     | SH3 domain binding glutamate-rich protein like 2                              | 3.1                | 4.5    | ns     |
|   |   |   | FRMD6        | FERM domain containing 6                                                      | 3.6                | 4.5    | ns     |
|   |   |   | MIR30A       | microRNA 30a                                                                  | 2.8                | 4.5    | ns     |
|   |   |   | USP46        | ubiquitin specific peptidase 46                                               | 3.0                | 4.5    | ns     |
|   |   |   | PIP5K1       | diphosphoinositol pentakisphosphate kinase 1                                  | 3.0                | 4.5    | ns     |
|   |   |   | LRP8         | LDL receptor related protein 8                                                | 2.7                | 4.5    | ns     |
|   |   |   | GATM         | glycine amidinotransferase (L-arginine:glycine amidinotransferase)            | 4.4                | 2.8    | ns     |
|   |   |   | SCNN1B       | sodium channel, non voltage gated 1 beta subunit                              | 4.0                | 4.4    | ns     |
|   |   |   | DYSF         | dysferlin                                                                     | 4.1                | 4.4    | ns     |
|   |   |   | GSTA4        | glutathione S-transferase alpha 4                                             | 2.5                | 4.4    | ns     |
|   |   |   | ANXA6        | annexin A6                                                                    | 3.2                | 4.4    | ns     |
|   |   |   | SLC26A2      | solute carrier family 26 (anion exchanger), member 2                          | 2.9                | 4.4    | ns     |
|   |   |   | CA8          | carbonic anhydrase VIII                                                       | 4.3                | 3.3    | ns     |
|   |   |   | LINC01119    | long intergenic non-protein coding RNA 1119                                   | 4.3                | 4.3    | ns     |
|   |   |   | PLAGL1       | pleiomorphic adenoma gene-like 1                                              | 4.3                | 3.2    | ns     |
|   |   |   | GS1-594A7.3  | uncharacterized LOC104798195                                                  | 4.2                | 3.6    | ns     |
|   |   |   | CHN1         | chimerin 1                                                                    | 4.2                | 3.6    | ns     |
|   |   |   | ADHFE1       | alcohol dehydrogenase, iron containing 1                                      | 2.7                | 4.2    | ns     |
|   |   |   | MCOLN3       | mucolipin 3                                                                   | 3.4                | 4.1    | ns     |
|   |   |   | PAPPA-AS2    | PAPPA antisense RNA 2                                                         | 3.0                | 4.1    | ns     |
|   |   |   | LOC101927354 | uncharacterized LOC101927354                                                  | 2.9                | 4.1    | ns     |
|   |   |   | KANK1        | KN motif and ankyrin repeat domains 1                                         | 3.9                | 4.0    | ns     |
|   |   |   | IQGAP2       | IQ motif containing GTPase activating protein 2                               | 4.0                | 3.2    | ns     |
|   |   |   | MIR4659A     | microRNA 4659a                                                                | 4.0                | 4.0    | ns     |
|   |   |   | LINC00472    | long intergenic non-protein coding RNA 472                                    | 4.0                | 2.4    | ns     |
|   |   |   | HSPB8        | heat shock 22kDa protein 8                                                    | 2.0                | 4.0    | ns     |
|   |   |   | ANKH         | ANKH inorganic pyrophosphate transport regulator                              | 4.0                | 2.4    | ns     |
|   |   |   | MIR30C2      | microRNA 30c-2                                                                | 3.4                | 4.0    | ns     |
|   |   |   | PLEKHG1      | pleckstrin homology domain containing, family G (with RhoGef domain) member 1 | 4.0                | 2.4    | ns     |
|   |   |   | COLEC12      | collectin sub-family member 12                                                | 4.0                | 3.9    | ns     |
|   |   |   | ELF5         | E74-like factor 5 (ets domain transcription factor)                           | 2.9                | 4.0    | ns     |
|   |   |   | ATP6V0A4     | ATPase, H <sup>+</sup> transporting, lysosomal V0 subunit a4                  | 2.8                | 4.0    | ns     |
|   |   |   | FAM171B      | family with sequence similarity 171, member B                                 | 3.3                | 4.0    | ns     |
|   |   |   | OR2F1        | olfactory receptor, family 2, subfamily F, member 1 (gene                     | 2.7                | 3.9    | ns     |
|   |   |   | GALNT11      | polypeptide N-acetylgalactosaminyltransferase 11                              | 3.3                | 3.9    | ns     |
|   |   |   | LOC105370312 | uncharacterized LOC105370312                                                  | 3.1                | 3.9    | ns     |
|   |   |   | CNTN5        | contactin 5                                                                   | 3.9                | 3.9    | ns     |
|   |   |   | SYT7         | synaptotagmin VII                                                             | 2.1                | 3.9    | ns     |
|   |   |   | MIR3120      | microRNA 3120                                                                 | 3.9                | 3.5    | ns     |
|   |   |   | CDH3         | cadherin 3, type 1, P-cadherin (placental)                                    | 2.7                | 3.9    | ns     |
|   |   |   | LINC00597    | long intergenic non-protein coding RNA 597                                    | 3.8                | 3.2    | ns     |
|   |   |   | MPP5         | membrane protein, palmitoylated 5                                             | 2.7                | 3.8    | ns     |
|   |   |   | LOC105378239 | uncharacterized LOC105378239                                                  | 3.5                | 3.8    | ns     |
|   |   |   | ANKFN1       | ankyrin-repeat and fibronectin type III domain containing 1                   | 3.1                | 3.8    | ns     |
|   |   |   | TGFB3        | transforming growth factor beta 3                                             | 3.3                | 3.8    | ns     |
|   |   |   | GRB14        | growth factor receptor bound protein 14                                       | 3.8                | 3.3    | ns     |
|   |   |   | CARD18       | caspase recruitment domain family, member 18                                  | 2.4                | 3.7    | ns     |
|   |   |   | SERINC5      | serine incorporator 5                                                         | 2.0                | 3.7    | ns     |
|   |   |   | ISL1         | ISL LIM homeobox 1                                                            | 2.8                | 3.7    | ns     |
|   |   |   | LOC101929325 | uncharacterized LOC101929325                                                  | 2.7                | 3.7    | ns     |
|   |   |   | CEP85        | centrosomal protein 85kDa                                                     | 2.2                | 3.7    | ns     |
|   |   |   | CLRN1-AS1    | CLRN1 antisense RNA 1                                                         | 2.2                | 3.6    | ns     |
|   |   |   | LRP6         | LDL receptor related protein 6                                                | 3.6                | 2.3    | ns     |
|   |   |   | PLCXD2-AS1   | PLCXD2 antisense RNA 1                                                        | 2.6                | 3.6    | ns     |
|   |   |   | TMEM88       | transmembrane protein 88                                                      | 3.6                | 3.6    | ns     |

| S | C | E | Symbol       | Name                                                                 | Linear Fold Change |        |        |
|---|---|---|--------------|----------------------------------------------------------------------|--------------------|--------|--------|
|   |   |   |              |                                                                      | S vs C             | S vs E | E vs C |
|   |   |   | INTS6L       | integrator complex subunit 6 like                                    | 3.5                | 2.5    | ns     |
|   |   |   | FUT9         | fucosyltransferase 9 (alpha (1,3) fucosyltransferase)                | 3.1                | 3.5    | ns     |
|   |   |   | ARL4C        | ADP-ribosylation factor like GTPase 4C                               | 2.4                | 3.5    | ns     |
|   |   |   | CDKL5        | cyclin-dependent kinase-like 5                                       | 2.0                | 3.5    | ns     |
|   |   |   | SORBS1       | sorbin and SH3 domain containing 1                                   | 2.8                | 3.5    | ns     |
|   |   |   | NCMAP        | noncompact myelin associated protein                                 | 2.8                | 3.5    | ns     |
|   |   |   | CD99P1       | CD99 molecule pseudogene 1                                           | 2.7                | 3.4    | ns     |
|   |   |   | PNP          | purine nucleoside phosphorylase                                      | 3.4                | 3.2    | ns     |
|   |   |   | TFCP2L1      | transcription factor CP2-like 1                                      | 3.1                | 3.4    | ns     |
|   |   |   | ARHGAP17     | Rho GTPase activating protein 17                                     | 3.3                | 3.4    | ns     |
|   |   |   | CECR2        | cat eye syndrome chromosome region, candidate 2                      | 2.1                | 3.4    | ns     |
|   |   |   | GABRA3       | gamma-aminobutyric acid (GABA) A receptor, alpha 3                   | 3.2                | 3.3    | ns     |
|   |   |   | LOC105378032 | uncharacterized LOC105378032                                         | 2.9                | 3.3    | ns     |
|   |   |   | PPP1R14C     | protein phosphatase 1, regulatory (inhibitor) subunit 14C            | 2.2                | 3.3    | ns     |
|   |   |   | MAPK4        | mitogen-activated protein kinase 4                                   | 3.3                | 3.1    | ns     |
|   |   |   | NOSTRIN      | nitric oxide synthase trafficking                                    | 3.3                | 3.2    | ns     |
|   |   |   | C2CD3        | C2 calcium-dependent domain containing 3                             | 2.5                | 3.3    | ns     |
|   |   |   | AP1S3        | adaptor-related protein complex 1 sigma 3 subunit                    | 2.5                | 3.2    | ns     |
|   |   |   | PDE5A        | phosphodiesterase 5A, cGMP-specific                                  | 3.2                | 2.6    | ns     |
|   |   |   | TMEM155      | transmembrane protein 155                                            | 2.9                | 3.2    | ns     |
|   |   |   | LOC105369592 | uncharacterized LOC105369592                                         | 3.2                | 3.0    | ns     |
|   |   |   | RALGAPA2     | Ral GTPase activating protein, alpha subunit 2 (catalytic)           | 3.1                | 3.2    | ns     |
|   |   |   | FREM2        | FRAS1 related extracellular matrix protein 2                         | 3.2                | 2.8    | ns     |
|   |   |   | BTG3         | BTG family, member 3                                                 | 2.6                | 3.2    | ns     |
|   |   |   | ELMO1        | engulfment and cell motility 1                                       | 2.7                | 3.2    | ns     |
|   |   |   | LOC105369683 | uncharacterized LOC105369683                                         | 2.5                | 3.2    | ns     |
|   |   |   | NOS3         | nitric oxide synthase 3 (endothelial cell)                           | 2.6                | 3.2    | ns     |
|   |   |   | SCN11A       | sodium channel, voltage gated, type XI alpha subunit                 | 3.1                | 3.1    | ns     |
|   |   |   | PP12613      | uncharacterized LOC100192379                                         | 3.1                | 3.0    | ns     |
|   |   |   | ST3GAL1      | ST3 beta-galactoside alpha-2,3-sialyltransferase 1                   | 2.4                | 3.1    | ns     |
|   |   |   | BMP2         | bone morphogenetic protein 2                                         | 3.1                | 2.1    | ns     |
|   |   |   | FURIN        | furin (paired basic amino acid cleaving enzyme)                      | 2.7                | 3.1    | ns     |
|   |   |   | LOC105374693 | spidroin-2-like                                                      | 3.1                | 3.0    | ns     |
|   |   |   | AZIN1        | antizyme inhibitor 1                                                 | 2.1                | 3.1    | ns     |
|   |   |   | STARD4-AS1   | STARD4 antisense RNA 1                                               | 2.6                | 3.1    | ns     |
|   |   |   | GCLM         | glutamate-cysteine ligase, modifier subunit                          | 3.1                | 2.6    | ns     |
|   |   |   | SLC16A12-AS1 | SLC16A12 antisense RNA 1                                             | 3.1                | 3.0    | ns     |
|   |   |   | HOXA13       | homeobox A13                                                         | 2.1                | 3.1    | ns     |
|   |   |   | PHACTR2      | phosphatase and actin regulator 2                                    | 2.5                | 3.0    | ns     |
|   |   |   | WWC1         | WW and C2 domain containing 1                                        | 2.8                | 3.0    | ns     |
|   |   |   | NCBP3        | nuclear cap binding subunit 3                                        | 2.8                | 3.0    | ns     |
|   |   |   | CTB-99A3.1   | uncharacterized LOC105378215                                         | 2.6                | 3.0    | ns     |
|   |   |   | CHSY1        | chondroitin sulfate synthase 1                                       | 3.0                | 2.3    | ns     |
|   |   |   | LOC102723465 | uncharacterized LOC102723465                                         | 2.2                | 3.0    | ns     |
|   |   |   | LOC105369748 | uncharacterized LOC105369748                                         | 2.1                | 2.9    | ns     |
|   |   |   | TMTC2        | transmembrane and tetratricopeptide repeat containing 2              | 2.9                | 2.1    | ns     |
|   |   |   | GOLT1A       | golgi transport 1A                                                   | 2.6                | 2.9    | ns     |
|   |   |   | SLC4A4       | solute carrier family 4 (sodium bicarbonate cotransporter), member 4 | 2.9                | 2.7    | ns     |
|   |   |   | LINC00882    | long intergenic non-protein coding RNA 882                           | 2.9                | 2.8    | ns     |
|   |   |   | SLC25A35     | solute carrier family 25, member 35                                  | 2.7                | 2.9    | ns     |
|   |   |   | SCAPER       | S-phase cyclin A-associated protein in the ER                        | 2.0                | 2.9    | ns     |
|   |   |   | TSHZ1        | teashirt zinc finger homeobox 1                                      | 2.9                | 2.0    | ns     |
|   |   |   | MIR4501      | microRNA 4501                                                        | 2.8                | 2.1    | ns     |
|   |   |   | LYPD8        | LY6                                                                  | 2.8                | 2.3    | ns     |
|   |   |   | KDM7A-DT     | KDM7A divergent transcript                                           | 2.4                | 2.8    | ns     |

| S | C | E | Symbol       | Name                                                                 | Linear Fold Change |        |        |
|---|---|---|--------------|----------------------------------------------------------------------|--------------------|--------|--------|
|   |   |   |              |                                                                      | S vs C             | S vs E | E vs C |
|   |   |   | CRNDE        | colorectal neoplasia differentially expressed (non-protein coding)   | 2.8                | 2.8    | ns     |
|   |   |   | CADM1        | cell adhesion molecule 1                                             | 2.8                | 2.6    | ns     |
|   |   |   | ATP2B1       | ATPase, Ca <sup>++</sup> transporting, plasma membrane 1             | 2.8                | 2.4    | ns     |
|   |   |   | CALHM4       | calcium homeostasis modulator family member 4                        | 2.6                | 2.8    | ns     |
|   |   |   | MYLK         | myosin light chain kinase                                            | 2.8                | 2.2    | ns     |
|   |   |   | GPR171       | G protein-coupled receptor 171                                       | 2.8                | 2.7    | ns     |
|   |   |   | SLC18B1      | solute carrier family 18, subfamily B, member 1                      | 2.8                | 2.5    | ns     |
|   |   |   | MIR199A2     | microRNA 199a-2                                                      | 2.6                | 2.7    | ns     |
|   |   |   | ETFDH        | electron-transferring-flavoprotein dehydrogenase                     | 2.5                | 2.7    | ns     |
|   |   |   | FAM234B      | family with sequence similarity 234, member B                        | 2.4                | 2.7    | ns     |
|   |   |   | PRTG         | protogenin                                                           | 2.7                | 2.7    | ns     |
|   |   |   | ABCC2        | ATP binding cassette subfamily C member 2                            | 2.7                | 2.5    | ns     |
|   |   |   | STAT5B       | signal transducer and activator of transcription 5B                  | 2.0                | 2.7    | ns     |
|   |   |   | PRKCE        | protein kinase C, epsilon                                            | 2.7                | 2.4    | ns     |
|   |   |   | C16orf74     | chromosome 16 open reading frame 74                                  | 2.2                | 2.7    | ns     |
|   |   |   | CAST         | calpastatin                                                          | 2.1                | 2.6    | ns     |
|   |   |   | ETV5         | ets variant 5                                                        | 2.2                | 2.6    | ns     |
|   |   |   | NRP2         | neuropilin 2                                                         | 2.6                | 2.4    | ns     |
|   |   |   | LOC105370632 | uncharacterized LOC105370632                                         | 2.1                | 2.6    | ns     |
|   |   |   | PARP1        | poly(ADP-ribose) polymerase 1                                        | 2.4                | 2.6    | ns     |
|   |   |   | RYR2         | ryanodine receptor 2 (cardiac)                                       | 2.6                | 2.3    | ns     |
|   |   |   | WFDC1        | WAP four-disulfide core domain 1                                     | 2.6                | 2.2    | ns     |
|   |   |   | MRPS31P5     | mitochondrial ribosomal protein S31 pseudogene 5                     | 2.1                | 2.6    | ns     |
|   |   |   | MAGEA10      | MAGE family member A10                                               | 2.3                | 2.6    | ns     |
|   |   |   | AK3          | adenylate kinase 3                                                   | 2.5                | 2.4    | ns     |
|   |   |   | CTDSPL       | CTD small phosphatase like                                           | 2.3                | 2.5    | ns     |
|   |   |   | CASP4        | caspase 4                                                            | 2.2                | 2.5    | ns     |
|   |   |   | PNPO         | pyridoxamine 5-phosphate oxidase                                     | 2.5                | 2.5    | ns     |
|   |   |   | BHLHE41      | basic helix-loop-helix family, member e41                            | 2.5                | 2.0    | ns     |
|   |   |   | JCAD         | junctional cadherin 5 associated                                     | 2.5                | 2.2    | ns     |
|   |   |   | PGAP6        | post-glycosylphosphatidylinositol attachment to proteins 6           | 2.3                | 2.5    | ns     |
|   |   |   | CATSPER2     | cation channel, sperm associated 2                                   | 2.2                | 2.5    | ns     |
|   |   |   | NREP         | neuronal regeneration related protein                                | 2.4                | 2.5    | ns     |
|   |   |   | DOCK8        | dedicator of cytokinesis 8                                           | 2.5                | 2.4    | ns     |
|   |   |   | DGKD         | diacylglycerol kinase, delta 130kDa                                  | 2.1                | 2.5    | ns     |
|   |   |   | EID2         | EP300 interacting inhibitor of differentiation 2                     | 2.3                | 2.4    | ns     |
|   |   |   | RARB         | retinoic acid receptor, beta                                         | 2.3                | 2.4    | ns     |
|   |   |   | BMP1         | bone morphogenetic protein 1                                         | 2.4                | 2.3    | ns     |
|   |   |   | NPAS2        | neuronal PAS domain protein 2                                        | 2.3                | 2.4    | ns     |
|   |   |   | ZSCAN12P1    | zinc finger and SCAN domain containing 12 pseudogene 1               | 2.4                | 2.4    | ns     |
|   |   |   | CDYL2        | chromodomain protein, Y-like 2                                       | 2.4                | 2.4    | ns     |
|   |   |   | SPRY4        | sprouty RTK signaling antagonist 4                                   | 2.4                | 2.1    | ns     |
|   |   |   | COQ9         | coenzyme Q9                                                          | 2.4                | 2.1    | ns     |
|   |   |   | MAGI3        | membrane associated guanylate kinase, WW and PDZ domain containing 3 | 2.4                | 2.2    | ns     |
|   |   |   | ELK1         | ELK1, member of ETS oncogene family                                  | 2.3                | 2.3    | ns     |
|   |   |   | LOC105375423 | uncharacterized LOC105375423                                         | 2.3                | 2.3    | ns     |
|   |   |   | LOC101928092 | uncharacterized LOC101928092                                         | 2.3                | 2.3    | ns     |
|   |   |   | MMP16        | matrix metalloproteinase 16 (membrane-inserted)                      | 2.2                | 2.3    | ns     |
|   |   |   | LOC105379091 | uncharacterized LOC105379091                                         | 2.2                | 2.3    | ns     |
|   |   |   | VSIR         | V-set immunoregulatory receptor                                      | 2.2                | 2.3    | ns     |
|   |   |   | KIAA0319     | KIAA0319                                                             | 2.2                | 2.2    | ns     |
|   |   |   | ORMDL1       | ORMDL sphingolipid biosynthesis regulator 1                          | 2.1                | 2.2    | ns     |
|   |   |   | PDE4D        | phosphodiesterase 4D, cAMP-specific                                  | 2.1                | 2.2    | ns     |
|   |   |   | CDK6         | cyclin-dependent kinase 6                                            | 2.2                | 2.1    | ns     |
|   |   |   | NETO2        | neuropilin (NRP) and tolloid (TLL)-like 2                            | 2.2                | 2.1    | ns     |



| S | C | E | Symbol       | Name                                                                   | Linear Fold Change |        |        |
|---|---|---|--------------|------------------------------------------------------------------------|--------------------|--------|--------|
|   |   |   |              |                                                                        | S vs C             | S vs E | E vs C |
|   |   |   | NAV2-AS4     | NAV2 antisense RNA 4                                                   | 2.2                | 2.1    | ns     |
|   |   |   | ASB2         | ankyrin repeat and SOCS box containing 2                               | 2.1                | 2.1    | ns     |
|   |   |   | FNDC3A       | fibronectin type III domain containing 3A                              | 2.1                | 2.1    | ns     |
|   |   |   | LDHB         | lactate dehydrogenase B                                                | 2.1                | 2.0    | ns     |
|   |   |   | OXGR1        | oxoglutarate (alpha-ketoglutarate) receptor 1                          | -15.0              | ns     | -7.4   |
|   |   |   | FABP7        | fatty acid binding protein 7, brain                                    | -12.6              | ns     | -9.7   |
|   |   |   | LOC102723596 | uncharacterized LOC102723596                                           | -9.3               | ns     | -11.5  |
|   |   |   | LOC105377976 | uncharacterized LOC105377976                                           | -10.3              | ns     | -8.0   |
|   |   |   | TNNI2        | troponin I type 2 (skeletal, fast)                                     | -10.1              | ns     | -4.6   |
|   |   |   | ITGB6        | integrin beta 6                                                        | -8.3               | ns     | -7.0   |
|   |   |   | COL17A1      | collagen, type XVII, alpha 1                                           | -8.2               | ns     | -3.7   |
|   |   |   | SERPINB7     | serpin peptidase inhibitor, clade B (ovalbumin), member 7              | -7.1               | ns     | -7.3   |
|   |   |   | RAB9BP1      | RAB9B, member RAS oncogene family pseudogene 1                         | -4.4               | ns     | -6.9   |
|   |   |   | NLRP2        | NLR family, pyrin domain containing 2                                  | -6.8               | ns     | -5.3   |
|   |   |   | ACAN         | aggrecan                                                               | -4.6               | ns     | -6.2   |
|   |   |   | SERTAD4      | SERTA domain containing 4                                              | -5.9               | ns     | -3.0   |
|   |   |   | FAM83B       | family with sequence similarity 83, member B                           | -3.4               | ns     | -5.7   |
|   |   |   | LOC102723854 | uncharacterized LOC102723854                                           | -5.2               | ns     | -3.4   |
|   |   |   | VIT          | vitrin                                                                 | -4.7               | ns     | -5.1   |
|   |   |   | KRT7         | keratin 7, type II                                                     | -5.0               | ns     | -3.7   |
|   |   |   | LOC105377408 | uncharacterized LOC105377408                                           | -4.8               | ns     | -2.7   |
|   |   |   | TET1         | tet methylcytosine dioxygenase 1                                       | -2.9               | ns     | -4.7   |
|   |   |   | KRT14        | keratin 14, type I                                                     | -4.7               | ns     | -3.5   |
|   |   |   | SRI          | sorcin                                                                 | -4.6               | ns     | -2.3   |
|   |   |   | IGSF10       | immunoglobulin superfamily, member 10                                  | -4.2               | ns     | -4.1   |
|   |   |   | CMTM4        | CKLF-like MARVEL transmembrane domain containing 4                     | -4.2               | ns     | -2.3   |
|   |   |   | SEMA4C       | semaphorin 4C                                                          | -4.0               | ns     | -2.3   |
|   |   |   | GDPD2        | glycerophosphodiester phosphodiesterase domain containing 2            | -4.0               | ns     | -3.8   |
|   |   |   | EFNA1        | ephrin-A1                                                              | -3.8               | ns     | -2.1   |
|   |   |   | LINC00456    | long intergenic non-protein coding RNA 456                             | -2.9               | ns     | -3.7   |
|   |   |   | CCDC81       | coiled-coil domain containing 81                                       | -3.6               | ns     | -2.7   |
|   |   |   | PKP2         | plakophilin 2                                                          | -3.6               | ns     | -2.1   |
|   |   |   | BMS1P18      | BMS1 ribosome biogenesis factor pseudogene 18                          | -3.6               | ns     | -2.4   |
|   |   |   | VLDLR        | very low density lipoprotein receptor                                  | -3.5               | ns     | -2.9   |
|   |   |   | PTBP3        | polypyrimidine tract binding protein 3                                 | -3.2               | ns     | -2.0   |
|   |   |   | GATA3        | GATA binding protein 3                                                 | -3.2               | ns     | -2.0   |
|   |   |   | APOBR        | apolipoprotein B receptor                                              | -3.1               | ns     | -2.2   |
|   |   |   | PPARG        | peroxisome proliferator-activated receptor gamma                       | -3.1               | ns     | -2.9   |
|   |   |   | INHA         | inhibin alpha                                                          | -3.0               | ns     | -2.4   |
|   |   |   | DLX3         | distal-less homeobox 3                                                 | -2.8               | ns     | -3.0   |
|   |   |   | CTSV         | cathepsin V                                                            | -2.6               | ns     | -3.0   |
|   |   |   | NOCT         | nocturnin                                                              | -2.6               | ns     | -2.9   |
|   |   |   | LOC101927431 | uncharacterized LOC101927431                                           | -2.8               | ns     | -2.9   |
|   |   |   | GPR37        | G protein-coupled receptor 37 (endothelin receptor type B-like)        | -2.7               | ns     | -2.8   |
|   |   |   | ZNF257       | zinc finger protein 257                                                | -2.7               | ns     | -2.8   |
|   |   |   | TRABD2A      | TraB domain containing 2A                                              | -2.8               | ns     | -2.3   |
|   |   |   | LOC105379110 | uncharacterized LOC105379110                                           | -2.3               | ns     | -2.7   |
|   |   |   | SYDE1        | synapse defective 1, Rho GTPase, homolog 1 (C. elegans)                | -2.7               | ns     | -2.3   |
|   |   |   | RFK          | riboflavin kinase                                                      | -2.6               | ns     | -2.3   |
|   |   |   | RTN2         | reticulon 2                                                            | -2.3               | ns     | -2.1   |
|   |   |   | PIK3CB       | phosphatidylinositol-4,5-bisphosphate 3-kinase, catalytic subunit beta | -2.0               | ns     | -2.3   |
|   |   |   | SLPI         | secretory leukocyte peptidase inhibitor                                | ns                 | -157.1 | 24.7   |
|   |   |   | GZMA         | granzyme A                                                             | ns                 | -92.6  | 15.0   |
|   |   |   | CFH          | complement factor H                                                    | ns                 | -83.1  | 16.5   |
|   |   |   | TRDC         | T cell receptor delta constant                                         | ns                 | -76.6  | 17.0   |

| S | C | E | Symbol       | Name                                                               | Linear Fold Change |        |        |
|---|---|---|--------------|--------------------------------------------------------------------|--------------------|--------|--------|
|   |   |   |              |                                                                    | S vs C             | S vs E | E vs C |
|   |   |   | TRDJ2        | T cell receptor delta joining 2                                    | ns                 | -75.4  | 19.3   |
|   |   |   | OMD          | osteomodulin                                                       | ns                 | -64.4  | 14.7   |
|   |   |   | RXFP1        | relaxin                                                            | ns                 | -57.4  | 17.9   |
|   |   |   | C3           | complement component 3                                             | ns                 | -44.8  | 15.5   |
|   |   |   | FGG          | fibrinogen gamma chain                                             | ns                 | -35.1  | 18.2   |
|   |   |   | KLRC1        | killer cell lectin-like receptor subfamily C, member 1             | ns                 | -34.8  | 14.2   |
|   |   |   | MEDAG        | mesenteric estrogen-dependent adipogenesis                         | ns                 | -34.7  | 12.1   |
|   |   |   | KLRC3        | killer cell lectin-like receptor subfamily C, member 3             | ns                 | -33.6  | 16.2   |
|   |   |   | CXCL10       | chemokine (C-X-C motif) ligand 10                                  | ns                 | -29.6  | 11.6   |
|   |   |   | CNR1         | cannabinoid receptor 1 (brain)                                     | ns                 | -28.0  | 13.4   |
|   |   |   | DKK1         | dickkopf WNT signaling pathway inhibitor 1                         | ns                 | -27.5  | 9.5    |
|   |   |   | ANKRD1       | ankyrin repeat domain 1 (cardiac muscle)                           | ns                 | -26.4  | 8.9    |
|   |   |   | CP           | ceruloplasmin (ferroxidase)                                        | ns                 | -24.8  | 15.9   |
|   |   |   | TRPC4        | transient receptor potential cation channel, subfamily C, member 4 | ns                 | -24.1  | 23.2   |
|   |   |   | P115         | peptidase inhibitor 15                                             | ns                 | -23.3  | 18.2   |
|   |   |   | CYP7B1       | cytochrome P450, family 7, subfamily B, polypeptide 1              | ns                 | -22.9  | 9.8    |
|   |   |   | NKG7         | natural killer cell granule protein 7                              | ns                 | -22.7  | 11.1   |
|   |   |   | NDP          | Norrie disease (pseudoglioma)                                      | ns                 | -21.0  | 9.2    |
|   |   |   | APOD         | apolipoprotein D                                                   | ns                 | -20.3  | 8.9    |
|   |   |   | CPXM1        | carboxypeptidase X (M14 family), member 1                          | ns                 | -19.4  | 13.0   |
|   |   |   | CCL4         | chemokine (C-C motif) ligand 4                                     | ns                 | -19.2  | 16.3   |
|   |   |   | PROK1        | prokineticin 1                                                     | ns                 | -19.1  | 9.9    |
|   |   |   | HSPB6        | heat shock protein, alpha-crystallin-related, B6                   | ns                 | -18.6  | 8.1    |
|   |   |   | TRDJ1        | T cell receptor delta joining 1                                    | ns                 | -17.8  | 11.1   |
|   |   |   | ALDH1A1      | aldehyde dehydrogenase 1 family, member A1                         | ns                 | -17.7  | 12.9   |
|   |   |   | PRUNE2       | prune homolog 2 (Drosophila)                                       | ns                 | -16.6  | 9.0    |
|   |   |   | TRBV3-1      | T cell receptor beta variable 3-1                                  | ns                 | -16.0  | 10.4   |
|   |   |   | RGS1         | regulator of G-protein signaling 1                                 | ns                 | -15.9  | 7.6    |
|   |   |   | CTSK         | cathepsin K                                                        | ns                 | -15.2  | 9.6    |
|   |   |   | RBP4         | retinol binding protein 4, plasma                                  | ns                 | -14.8  | 8.9    |
|   |   |   | GZMK         | granzyme K                                                         | ns                 | -14.7  | 9.3    |
|   |   |   | MAOB         | monoamine oxidase B                                                | ns                 | -14.5  | 6.7    |
|   |   |   | ABCA8        | ATP binding cassette subfamily A member 8                          | ns                 | -11.2  | 14.4   |
|   |   |   | LOC100507639 | uncharacterized LOC100507639                                       | ns                 | -14.4  | 8.9    |
|   |   |   | PALMD        | palmdelphin                                                        | ns                 | -5.0   | 14.1   |
|   |   |   | MACC1-AS1    | MACC1 antisense RNA 1                                              | ns                 | -13.9  | 6.8    |
|   |   |   | MAP3K5       | mitogen-activated protein kinase kinase kinase 5                   | ns                 | -13.9  | 7.6    |
|   |   |   | FPR3         | formyl peptide receptor 3                                          | ns                 | -13.9  | 10.1   |
|   |   |   | KLRC4-KLRK1  | KLRC4-KLRK1 readthrough                                            | ns                 | -13.9  | 11.4   |
|   |   |   | IFI44        | interferon-induced protein 44                                      | ns                 | -13.5  | 12.3   |
|   |   |   | TRGJP1       | T cell receptor gamma joining P1                                   | ns                 | -13.4  | 12.6   |
|   |   |   | PGR          | progesterone receptor                                              | ns                 | -13.3  | 9.8    |
|   |   |   | SULF2        | sulfatase 2                                                        | ns                 | -13.1  | 10.5   |
|   |   |   | PARM1        | prostate androgen-regulated mucin-like protein 1                   | ns                 | -13.0  | 12.1   |
|   |   |   | TRGJP2       | T cell receptor gamma joining P2                                   | ns                 | -13.0  | 11.4   |
|   |   |   | CST11        | cystatin 11                                                        | ns                 | -12.9  | 9.3    |
|   |   |   | ABI3BP       | ABI family, member 3 (NESH) binding protein                        | ns                 | -12.8  | 8.4    |
|   |   |   | AOX1         | aldehyde oxidase 1                                                 | ns                 | -12.7  | 11.5   |
|   |   |   | XCL2         | chemokine (C motif) ligand 2                                       | ns                 | -12.6  | 6.5    |
|   |   |   | SPARCL1      | SPARC like 1                                                       | ns                 | -3.9   | 12.5   |
|   |   |   | HSD11B1      | hydroxysteroid (11-beta) dehydrogenase 1                           | ns                 | -11.8  | 12.4   |
|   |   |   | IL15         | interleukin 15                                                     | ns                 | -12.4  | 11.8   |
|   |   |   | FGA          | fibrinogen alpha chain                                             | ns                 | -11.2  | 12.2   |
|   |   |   | COX7A1       | cytochrome c oxidase subunit VIIa polypeptide 1 (muscle)           | ns                 | -7.1   | 12.1   |
|   |   |   | CD96         | CD96 molecule                                                      | ns                 | -12.1  | 9.0    |



| S | C | E | Symbol       | Name                                                                                | Linear Fold Change |        |        |
|---|---|---|--------------|-------------------------------------------------------------------------------------|--------------------|--------|--------|
|   |   |   |              |                                                                                     | S vs C             | S vs E | E vs C |
|   |   |   | SQOR         | sulfide quinone oxidoreductase                                                      | ns                 | -12.1  | 9.5    |
|   |   |   | PLPP1        | phospholipid phosphatase 1                                                          | ns                 | -11.7  | 7.4    |
|   |   |   | GALNT15      | polypeptide N-acetylgalactosaminyltransferase 15                                    | ns                 | -11.6  | 8.7    |
|   |   |   | CLIC2        | chloride intracellular channel 2                                                    | ns                 | -11.6  | 10.9   |
|   |   |   | FHL5         | four and a half LIM domains 5                                                       | ns                 | -11.4  | 8.7    |
|   |   |   | GZMB         | granzyme B                                                                          | ns                 | -11.4  | 7.5    |
|   |   |   | STAP1        | signal transducing adaptor family member 1                                          | ns                 | -10.9  | 11.2   |
|   |   |   | AVPR1A       | arginine vasopressin receptor 1A                                                    | ns                 | -11.1  | 7.5    |
|   |   |   | WT1          | Wilms tumor 1                                                                       | ns                 | -11.0  | 5.6    |
|   |   |   | LOC105372762 | uncharacterized LOC105372762                                                        | ns                 | -8.5   | 10.9   |
|   |   |   | PTPN22       | protein tyrosine phosphatase, non-receptor type 22 (lymphoid)                       | ns                 | -10.8  | 8.8    |
|   |   |   | CHI3L2       | chitinase 3-like 2                                                                  | ns                 | -10.6  | 4.4    |
|   |   |   | IL2RG        | interleukin 2 receptor, gamma                                                       | ns                 | -10.6  | 7.9    |
|   |   |   | GPR174       | G protein-coupled receptor 174                                                      | ns                 | -10.6  | 8.6    |
|   |   |   | PDGFD        | platelet derived growth factor D                                                    | ns                 | -10.5  | 8.3    |
|   |   |   | MXRA7        | matrix-remodelling associated 7                                                     | ns                 | -10.5  | 4.1    |
|   |   |   | HLA-DPA1     | major histocompatibility complex, class II, DP alpha 1                              | ns                 | -10.4  | 5.6    |
|   |   |   | SULF1        | sulfatase 1                                                                         | ns                 | -10.3  | 8.5    |
|   |   |   | PRF1         | perforin 1 (pore forming protein)                                                   | ns                 | -10.1  | 6.2    |
|   |   |   | ZNF727       | zinc finger protein 727                                                             | ns                 | -10.1  | 6.9    |
|   |   |   | FGF2         | fibroblast growth factor 2 (basic)                                                  | ns                 | -5.9   | 10.0   |
|   |   |   | PILRA        | paired immunoglobulin-like type 2 receptor alpha                                    | ns                 | -10.0  | 6.7    |
|   |   |   | CD74         | CD74 molecule, major histocompatibility complex, class II invariant chain           | ns                 | -10.0  | 5.0    |
|   |   |   | ME1          | malic enzyme 1, NADP(+)-dependent, cytosolic                                        | ns                 | -10.0  | 6.6    |
|   |   |   | GZMH         | granzyme H                                                                          | ns                 | -9.7   | 6.9    |
|   |   |   | IGFBP2       | insulin like growth factor binding protein 2                                        | ns                 | -9.7   | 6.6    |
|   |   |   | PLN          | phospholamban                                                                       | ns                 | -3.7   | 9.7    |
|   |   |   | TM6SF1       | transmembrane 6 superfamily member 1                                                | ns                 | -5.4   | 9.6    |
|   |   |   | CABCOCO1     | ciliary associated calcium binding coiled-coil 1                                    | ns                 | -9.5   | 6.5    |
|   |   |   | TMTC1        | transmembrane and tetratricopeptide repeat containing 1                             | ns                 | -9.5   | 9.2    |
|   |   |   | PTPRC        | protein tyrosine phosphatase, receptor type, C                                      | ns                 | -9.3   | 9.4    |
|   |   |   | SEMA3A       | semaphorin 3A                                                                       | ns                 | -6.4   | 9.3    |
|   |   |   | SCARA5       | scavenger receptor class A, member 5                                                | ns                 | -9.3   | 7.0    |
|   |   |   | SPOCK1       | sparc                                                                               | ns                 | -9.3   | 5.1    |
|   |   |   | CLEC2B       | C-type lectin domain family 2, member B                                             | ns                 | -5.7   | 9.3    |
|   |   |   | TRAV20       | T cell receptor alpha variable 20                                                   | ns                 | -9.3   | 7.4    |
|   |   |   | CFI          | complement factor I                                                                 | ns                 | -6.8   | 9.2    |
|   |   |   | SYNPO2       | synaptopodin 2                                                                      | ns                 | -8.5   | 9.2    |
|   |   |   | PLEKHH2      | pleckstrin homology domain containing, family H (with MyTH4 domain) member 2        | ns                 | -5.9   | 9.1    |
|   |   |   | ABCA6        | ATP binding cassette subfamily A member 6                                           | ns                 | -7.7   | 9.1    |
|   |   |   | PTH1H        | parathyroid hormone-like hormone                                                    | ns                 | -9.1   | 5.6    |
|   |   |   | CTSW         | cathepsin W                                                                         | ns                 | -9.0   | 7.7    |
|   |   |   | SLC1A1       | solute carrier family 1 (neuronal                                                   | ns                 | -7.0   | 9.0    |
|   |   |   | FGB          | fibrinogen beta chain                                                               | ns                 | -9.0   | 8.7    |
|   |   |   | P2RY14       | purinergic receptor P2Y, G-protein coupled, 14                                      | ns                 | -4.1   | 8.9    |
|   |   |   | PTPN13       | protein tyrosine phosphatase, non-receptor type 13 (APO-1                           | ns                 | -6.6   | 8.9    |
|   |   |   | IGFBP4       | insulin like growth factor binding protein 4                                        | ns                 | -8.8   | 7.3    |
|   |   |   | IGFBP6       | insulin like growth factor binding protein 6                                        | ns                 | -8.8   | 4.4    |
|   |   |   | GPR82        | G protein-coupled receptor 82                                                       | ns                 | -8.7   | 8.2    |
|   |   |   | RNASE2       | ribonuclease, RNase A family, 2 (liver, eosinophil-derived neurotoxin)              | ns                 | -8.6   | 6.9    |
|   |   |   | PDZK1IP1     | PDZK1 interacting protein 1                                                         | ns                 | -8.6   | 4.5    |
|   |   |   | SERPINA3     | serpin peptidase inhibitor, clade A (alpha-1 antiproteinase, antitrypsin), member 3 | ns                 | -8.4   | 4.2    |
|   |   |   | DEPTOR       | DEP domain containing MTOR-interacting protein                                      | ns                 | -8.4   | 5.1    |
|   |   |   | PTPRCAP      | protein tyrosine phosphatase, receptor type, C-associated protein                   | ns                 | -8.2   | 5.4    |
|   |   |   | NAV3         | neuron navigator 3                                                                  | ns                 | -5.3   | 8.2    |

| S | C | E | Symbol       | Name                                                                            | Linear Fold Change |        |        |
|---|---|---|--------------|---------------------------------------------------------------------------------|--------------------|--------|--------|
|   |   |   |              |                                                                                 | S vs C             | S vs E | E vs C |
|   |   |   | PLCL1        | phospholipase C-like 1                                                          | ns                 | -4.1   | 8.1    |
|   |   |   | IGFBP7       | insulin like growth factor binding protein 7                                    | ns                 | -7.2   | 8.1    |
|   |   |   | CD52         | CD52 molecule                                                                   | ns                 | -8.1   | 5.6    |
|   |   |   | ADAMTS5      | ADAM metalloproteinase with thrombospondin type 1 motif 5                       | ns                 | -7.9   | 8.0    |
|   |   |   | GAS1         | growth arrest-specific 1                                                        | ns                 | -8.0   | 5.8    |
|   |   |   | LRRK2        | leucine-rich repeat kinase 2                                                    | ns                 | -7.0   | 7.9    |
|   |   |   | CCL4L2       | chemokine (C-C motif) ligand 4-like 2                                           | ns                 | -7.9   | 6.5    |
|   |   |   | HAND2-AS1    | HAND2 antisense RNA 1 (head to head)                                            | ns                 | -7.8   | 7.6    |
|   |   |   | PRDM1        | PR domain containing 1, with ZNF domain                                         | ns                 | -7.8   | 6.2    |
|   |   |   | HAMP         | hepcidin antimicrobial peptide                                                  | ns                 | -7.7   | 4.1    |
|   |   |   | ENTPD3       | ectonucleoside triphosphate diphosphohydrolase 3                                | ns                 | -7.7   | 6.4    |
|   |   |   | REN          | renin                                                                           | ns                 | -7.7   | 6.8    |
|   |   |   | MYL9         | myosin light chain 9                                                            | ns                 | -7.5   | 6.6    |
|   |   |   | CCL21        | chemokine (C-C motif) ligand 21                                                 | ns                 | -7.5   | 7.2    |
|   |   |   | LOC105379342 | uncharacterized LOC105379342                                                    | ns                 | -7.4   | 5.0    |
|   |   |   | ITGB8        | integrin beta 8                                                                 | ns                 | -3.2   | 7.4    |
|   |   |   | HLA-DQA2     | major histocompatibility complex, class II, DQ alpha 2                          | ns                 | -7.3   | 4.2    |
|   |   |   | DOCK10       | dedicator of cytokinesis 10                                                     | ns                 | -7.3   | 6.7    |
|   |   |   | DTNA         | dystrobrevin, alpha                                                             | ns                 | -7.3   | 6.1    |
|   |   |   | CD226        | CD226 molecule                                                                  | ns                 | -6.7   | 7.2    |
|   |   |   | ADRA2C       | adrenoceptor alpha 2C                                                           | ns                 | -7.1   | 4.5    |
|   |   |   | TLR4         | toll-like receptor 4                                                            | ns                 | -4.9   | 7.1    |
|   |   |   | TRDJ3        | T cell receptor delta joining 3                                                 | ns                 | -7.1   | 6.6    |
|   |   |   | PRR15        | proline rich 15                                                                 | ns                 | -7.0   | 3.0    |
|   |   |   | ASPN         | asporin                                                                         | ns                 | -7.0   | 5.9    |
|   |   |   | NPR3         | natriuretic peptide receptor 3                                                  | ns                 | -6.9   | 7.0    |
|   |   |   | CXCL13       | chemokine (C-X-C motif) ligand 13                                               | ns                 | -7.0   | 4.9    |
|   |   |   | ZEB1         | zinc finger E-box binding homeobox 1                                            | ns                 | -3.9   | 7.0    |
|   |   |   | TXNIP        | thioredoxin interacting protein                                                 | ns                 | -2.6   | 7.0    |
|   |   |   | TRGV10       | T cell receptor gamma variable 10 (non-functional)                              | ns                 | -6.9   | 6.8    |
|   |   |   | RGS2         | regulator of G-protein signaling 2                                              | ns                 | -3.4   | 6.9    |
|   |   |   | TMEM47       | transmembrane protein 47                                                        | ns                 | -6.9   | 6.8    |
|   |   |   | EMILIN2      | elastin microfibril interfacier 2                                               | ns                 | -4.7   | 6.9    |
|   |   |   | CD2          | CD2 molecule                                                                    | ns                 | -6.3   | 6.8    |
|   |   |   | RGS22        | regulator of G-protein signaling 22                                             | ns                 | -6.8   | 5.1    |
|   |   |   | DPYD         | dihydropyrimidine dehydrogenase                                                 | ns                 | -5.0   | 6.8    |
|   |   |   | OSGIN2       | oxidative stress induced growth inhibitor family member 2                       | ns                 | -6.7   | 3.1    |
|   |   |   | SAMD9L       | sterile alpha motif domain containing 9-like                                    | ns                 | -6.7   | 4.9    |
|   |   |   | KIR2DL3      | killer cell immunoglobulin-like receptor, two domains, long cytoplasmic tail, 3 | ns                 | -6.6   | 5.6    |
|   |   |   | RNASE6       | ribonuclease, RNase A family, k6                                                | ns                 | -4.7   | 6.6    |
|   |   |   | CXCL16       | chemokine (C-X-C motif) ligand 16                                               | ns                 | -6.6   | 3.8    |
|   |   |   | CD248        | CD248 molecule, endosialin                                                      | ns                 | -4.3   | 6.6    |
|   |   |   | PDGFRA       | platelet-derived growth factor receptor, alpha polypeptide                      | ns                 | -2.9   | 6.6    |
|   |   |   | KCND2        | potassium channel, voltage gated Shal related subfamily D, member 2             | ns                 | -6.5   | 5.6    |
|   |   |   | ANG          | angiogenin, ribonuclease, RNase A family, 5                                     | ns                 | -6.5   | 3.1    |
|   |   |   | METRN        | meteorin, glial cell differentiation regulator                                  | ns                 | -6.5   | 2.9    |
|   |   |   | GLB1L2       | galactosidase beta 1 like 2                                                     | ns                 | -6.5   | 4.1    |
|   |   |   | GPR155       | G protein-coupled receptor 155                                                  | ns                 | -6.5   | 3.5    |
|   |   |   | OGN          | osteoglycin                                                                     | ns                 | -5.3   | 6.4    |
|   |   |   | KLRB1        | killer cell lectin-like receptor subfamily B, member 1                          | ns                 | -6.4   | 5.0    |
|   |   |   | EMP3         | epithelial membrane protein 3                                                   | ns                 | -6.3   | 4.3    |
|   |   |   | LOC102724994 | putative POM121-like protein 1-like                                             | ns                 | -6.3   | 5.5    |
|   |   |   | LOC441081    | POM121 membrane glycoprotein (rat) pseudogene                                   | ns                 | -6.3   | 5.5    |
|   |   |   | LOC728093    | putative POM121-like protein 1-like                                             | ns                 | -6.3   | 5.5    |
|   |   |   | CTSS         | cathepsin S                                                                     | ns                 | -5.1   | 6.3    |

| S | C | E | Symbol       | Name                                                                | Linear Fold Change |        |        |
|---|---|---|--------------|---------------------------------------------------------------------|--------------------|--------|--------|
|   |   |   |              |                                                                     | S vs C             | S vs E | E vs C |
|   |   |   | LAPTM5       | lysosomal protein transmembrane 5                                   | ns                 | -4.9   | 6.3    |
|   |   |   | MS4A6A       | membrane-spanning 4-domains, subfamily A, member 6A                 | ns                 | -4.7   | 6.2    |
|   |   |   | TUBA3E       | tubulin, alpha 3e                                                   | ns                 | -6.2   | 3.9    |
|   |   |   | SCPEP1       | serine carboxypeptidase 1                                           | ns                 | -5.8   | 6.1    |
|   |   |   | FGL2         | fibrinogen-like 2                                                   | ns                 | -4.2   | 6.1    |
|   |   |   | CCL2         | chemokine (C-C motif) ligand 2                                      | ns                 | -3.5   | 6.1    |
|   |   |   | CERS6-AS1    | CERS6 antisense RNA 1                                               | ns                 | -6.1   | 4.1    |
|   |   |   | GREB1        | growth regulation by estrogen in breast cancer 1                    | ns                 | -6.1   | 5.3    |
|   |   |   | APOBEC3C     | apolipoprotein B mRNA editing enzyme, catalytic polypeptide-like 3C | ns                 | -4.5   | 6.0    |
|   |   |   | KLF9         | Kruppel-like factor 9                                               | ns                 | -6.0   | 4.9    |
|   |   |   | EVA1C        | eva-1 homolog C (C. elegans)                                        | ns                 | -5.9   | 5.2    |
|   |   |   | STAMBPL1     | STAM binding protein-like 1                                         | ns                 | -4.1   | 5.9    |
|   |   |   | MCTP1        | multiple C2 domains, transmembrane 1                                | ns                 | -3.7   | 5.9    |
|   |   |   | MS4A7        | membrane-spanning 4-domains, subfamily A, member 7                  | ns                 | -3.5   | 5.9    |
|   |   |   | ISLR         | immunoglobulin superfamily containing leucine-rich repeat           | ns                 | -5.8   | 4.1    |
|   |   |   | THBS1        | thrombospondin 1                                                    | ns                 | -3.6   | 5.8    |
|   |   |   | RBP1         | retinol binding protein 1, cellular                                 | ns                 | -5.8   | 2.9    |
|   |   |   | MECOM        | MDS1 and EVI1 complex locus                                         | ns                 | -2.6   | 5.7    |
|   |   |   | MGP          | matrix Gla protein                                                  | ns                 | -5.7   | 5.4    |
|   |   |   | DHRS3        | dehydrogenase                                                       | ns                 | -5.7   | 2.4    |
|   |   |   | KERA         | keratocan                                                           | ns                 | -5.7   | 4.8    |
|   |   |   | HTR2B        | 5-hydroxytryptamine (serotonin) receptor 2B, G protein-coupled      | ns                 | -5.7   | 4.1    |
|   |   |   | TNFRSF11B    | tumor necrosis factor receptor superfamily, member 11b              | ns                 | -5.7   | 5.2    |
|   |   |   | LOC105376125 | uncharacterized LOC105376125                                        | ns                 | -5.7   | 5.1    |
|   |   |   | CAB39L       | calcium binding protein 39-like                                     | ns                 | -5.7   | 4.8    |
|   |   |   | FCER1G       | Fc fragment of IgE, high affinity I, receptor for gamma polypeptide | ns                 | -3.5   | 5.6    |
|   |   |   | LYZ          | lysozyme                                                            | ns                 | -5.5   | 4.1    |
|   |   |   | CST7         | cystatin F (leukocystatin)                                          | ns                 | -5.5   | 3.0    |
|   |   |   | MGST1        | microsomal glutathione S-transferase 1                              | ns                 | -5.5   | 3.6    |
|   |   |   | MFGE8        | milk fat globule-EGF factor 8 protein                               | ns                 | -5.5   | 3.8    |
|   |   |   | HAND2        | heart and neural crest derivatives expressed 2                      | ns                 | -5.5   | 4.2    |
|   |   |   | S100A3       | S100 calcium binding protein A3                                     | ns                 | -5.5   | 4.6    |
|   |   |   | CD38         | CD38 molecule                                                       | ns                 | -5.5   | 3.6    |
|   |   |   | MACC1        | metastasis associated in colon cancer 1                             | ns                 | -5.5   | 3.7    |
|   |   |   | LMOD1        | leiomodulin 1 (smooth muscle)                                       | ns                 | -3.6   | 5.5    |
|   |   |   | CEP126       | centrosomal protein 126kDa                                          | ns                 | -5.4   | 3.3    |
|   |   |   | CD53         | CD53 molecule                                                       | ns                 | -3.6   | 5.4    |
|   |   |   | MAP1LC3C     | microtubule associated protein 1 light chain 3 gamma                | ns                 | -4.1   | 5.4    |
|   |   |   | BTBD3        | BTB (POZ) domain containing 3                                       | ns                 | -2.4   | 5.3    |
|   |   |   | TLR1         | toll-like receptor 1                                                | ns                 | -5.3   | 4.1    |
|   |   |   | CERS6        | ceramide synthase 6                                                 | ns                 | -5.3   | 4.4    |
|   |   |   | TYROBP       | TYRO protein tyrosine kinase binding protein                        | ns                 | -4.7   | 5.3    |
|   |   |   | AXL          | AXL receptor tyrosine kinase                                        | ns                 | -5.0   | 5.2    |
|   |   |   | CCDC170      | coiled-coil domain containing 170                                   | ns                 | -5.2   | 3.5    |
|   |   |   | LCP2         | lymphocyte cytosolic protein 2                                      | ns                 | -3.5   | 5.2    |
|   |   |   | LINC00707    | long intergenic non-protein coding RNA 707                          | ns                 | -5.2   | 4.8    |
|   |   |   | TSPAN1       | tetraspanin 1                                                       | ns                 | -4.9   | 5.2    |
|   |   |   | LOC389033    | placenta-specific 9 pseudogene                                      | ns                 | -5.1   | 3.5    |
|   |   |   | APOO         | apolipoprotein O                                                    | ns                 | -5.0   | 5.1    |
|   |   |   | OTULINL      | OTU deubiquitinase with linear linkage specificity like             | ns                 | -4.6   | 5.0    |
|   |   |   | APCS         | amyloid P component, serum                                          | ns                 | -4.5   | 5.0    |
|   |   |   | TLR7         | toll-like receptor 7                                                | ns                 | -3.9   | 4.9    |
|   |   |   | MYO5A        | myosin VA                                                           | ns                 | -2.8   | 4.9    |
|   |   |   | C1QC         | complement component 1, q subcomponent, C chain                     | ns                 | -4.7   | 4.8    |
|   |   |   | GTF2A1L      | general transcription factor IIA 1-like                             | ns                 | -3.9   | 4.8    |

| S | C | E | Symbol       | Name                                              | Linear Fold Change |        |        |
|---|---|---|--------------|---------------------------------------------------|--------------------|--------|--------|
|   |   |   |              |                                                   | S vs C             | S vs E | E vs C |
|   |   |   | PRPS2        | phosphoribosyl pyrophosphate synthetase 2         | ns                 | -4.7   | 4.8    |
|   |   |   | NCAM1        | neural cell adhesion molecule 1                   | ns                 | -4.8   | 3.5    |
|   |   |   | SH3BGRL      | SH3 domain binding glutamate-rich protein like    | ns                 | -2.5   | 4.8    |
|   |   |   | C1QA         | complement component 1, q subcomponent, A chain   | ns                 | -3.1   | 4.8    |
|   |   |   | MSN          | moesin                                            | ns                 | -2.5   | 4.8    |
|   |   |   | ODC1         | ornithine decarboxylase 1                         | ns                 | -3.1   | 4.8    |
|   |   |   | CD68         | CD68 molecule                                     | ns                 | -4.8   | 3.0    |
|   |   |   | LONRF2       | LON peptidase N-terminal domain and ring finger 2 | ns                 | -2.3   | 4.8    |
|   |   |   | SETDB2       | SET domain, bifurcated 2                          | ns                 | -4.8   | 3.3    |
|   |   |   | HOXA11       | homeobox A11                                      | ns                 | -4.5   | 4.7    |
|   |   |   | GBP5         | guanylate binding protein 5                       | ns                 | -4.6   | 4.7    |
|   |   |   | ICAM2        | intercellular adhesion molecule 2                 | ns                 | -2.2   | 4.7    |
|   |   |   | C1GALT1C1L   | C1GALT1-specific chaperone 1 like                 | ns                 | -4.7   | 3.8    |
|   |   |   | TMEM132C     | transmembrane protein 132C                        | ns                 | -4.7   | 2.9    |
|   |   |   | SYTL4        | synaptotagmin-like 4                              | ns                 | -3.0   | 4.6    |
|   |   |   | C1S          | complement component 1, s subcomponent            | ns                 | -4.5   | 4.6    |
|   |   |   | GPRIN3       | GPRIN family member 3                             | ns                 | -4.6   | 3.8    |
|   |   |   | EOMES        | eomesodermin                                      | ns                 | -4.0   | 4.6    |
|   |   |   | C5AR1        | complement component 5a receptor 1                | ns                 | -4.6   | 4.0    |
|   |   |   | C1QB         | complement component 1, q subcomponent, B chain   | ns                 | -4.6   | 4.1    |
|   |   |   | C1R          | complement component 1, r subcomponent            | ns                 | -4.6   | 3.6    |
|   |   |   | MTDH         | metadherin                                        | ns                 | -4.5   | 2.4    |
|   |   |   | NNMT         | nicotinamide N-methyltransferase                  | ns                 | -4.5   | 4.2    |
|   |   |   | PLA2R1       | phospholipase A2 receptor 1                       | ns                 | -4.5   | 2.8    |
|   |   |   | EMCN         | endomucin                                         | ns                 | -4.5   | 3.9    |
|   |   |   | CCN4         | cellular communication network factor 4           | ns                 | -4.5   | 3.6    |
|   |   |   | TLR2         | toll-like receptor 2                              | ns                 | -4.5   | 4.0    |
|   |   |   | TIPARP       | TCDD-inducible poly(ADP-ribose) polymerase        | ns                 | -4.5   | 2.5    |
|   |   |   | MAP1B        | microtubule associated protein 1B                 | ns                 | -2.1   | 4.5    |
|   |   |   | CD3D         | CD3d molecule, delta (CD3-TCR complex)            | ns                 | -4.5   | 4.3    |
|   |   |   | FOXO1        | forkhead box O1                                   | ns                 | -4.4   | 2.3    |
|   |   |   | HCST         | hematopoietic cell signal transducer              | ns                 | -3.2   | 4.4    |
|   |   |   | PRKACB       | protein kinase, cAMP-dependent, catalytic, beta   | ns                 | -3.0   | 4.4    |
|   |   |   | ANOS1        | anosmin 1                                         | ns                 | -4.4   | 2.6    |
|   |   |   | LOC105369863 | uncharacterized LOC105369863                      | ns                 | -3.7   | 4.4    |
|   |   |   | DDR2         | discoidin domain receptor tyrosine kinase 2       | ns                 | -3.3   | 4.4    |
|   |   |   | LOC101926934 | uncharacterized LOC101926934                      | ns                 | -4.4   | 3.2    |
|   |   |   | CCL23        | chemokine (C-C motif) ligand 23                   | ns                 | -3.4   | 4.4    |
|   |   |   | VWF          | von Willebrand factor                             | ns                 | -2.7   | 4.4    |
|   |   |   | LOC101927414 | uncharacterized LOC101927414                      | ns                 | -2.8   | 4.4    |
|   |   |   | IFI16        | interferon, gamma-inducible protein 16            | ns                 | -2.4   | 4.4    |
|   |   |   | EMP1         | epithelial membrane protein 1                     | ns                 | -2.3   | 4.4    |
|   |   |   | FBLN5        | fibulin 5                                         | ns                 | -4.3   | 4.4    |
|   |   |   | MIR4263      | microRNA 4263                                     | ns                 | -3.5   | 4.3    |
|   |   |   | PCBD1        | pterin-4 alpha-carbinolamine dehydratase          | ns                 | -3.0   | 4.3    |
|   |   |   | STK39        | serine threonine kinase 39                        | ns                 | -3.4   | 4.3    |
|   |   |   | OLFML2B      | olfactomedin like 2B                              | ns                 | -2.6   | 4.3    |
|   |   |   | RNF144B      | ring finger protein 144B                          | ns                 | -4.3   | 3.1    |
|   |   |   | RGCC         | regulator of cell cycle                           | ns                 | -4.2   | 3.8    |
|   |   |   | LSAMP        | limbic system-associated membrane protein         | ns                 | -4.1   | 4.2    |
|   |   |   | LOC100505851 | uncharacterized LOC100505851                      | ns                 | -4.2   | 2.2    |
|   |   |   | DPYD-AS1     | DPYD antisense RNA 1                              | ns                 | -4.2   | 3.8    |
|   |   |   | JUN          | jun proto-oncogene                                | ns                 | -3.4   | 4.2    |
|   |   |   | CCL4L1       | chemokine (C-C motif) ligand 4-like 1             | ns                 | -3.7   | 4.2    |
|   |   |   | COPZ2        | coatamer protein complex subunit zeta 2           | ns                 | -4.2   | 3.0    |



| S | C | E | Symbol       | Name                                                                                                         | Linear Fold Change |        |        |
|---|---|---|--------------|--------------------------------------------------------------------------------------------------------------|--------------------|--------|--------|
|   |   |   |              |                                                                                                              | S vs C             | S vs E | E vs C |
|   |   |   | IFITM2       | interferon induced transmembrane protein 2                                                                   | ns                 | -2.4   | 4.2    |
|   |   |   | LPAR1        | lysophosphatidic acid receptor 1                                                                             | ns                 | -2.4   | 4.2    |
|   |   |   | IL13RA2      | interleukin 13 receptor, alpha 2                                                                             | ns                 | -4.2   | 3.9    |
|   |   |   | ALDH1A2      | aldehyde dehydrogenase 1 family, member A2                                                                   | ns                 | -4.2   | 2.9    |
|   |   |   | WNT5A        | wingless-type MMTV integration site family, member 5A                                                        | ns                 | -3.1   | 4.2    |
|   |   |   | TPST1        | tyrosylprotein sulfotransferase 1                                                                            | ns                 | -3.9   | 4.1    |
|   |   |   | ST6GALNAC3   | ST6 (alpha-N-acetyl-neuraminy-2,3-beta-galactosyl-1,3)-N-acetylgalactosaminide alpha-2,6-sialyltransferase 3 | ns                 | -2.9   | 4.1    |
|   |   |   | PDGFRB       | platelet-derived growth factor receptor, beta polypeptide                                                    | ns                 | -2.3   | 4.1    |
|   |   |   | CXCL11       | chemokine (C-X-C motif) ligand 11                                                                            | ns                 | -4.1   | 3.0    |
|   |   |   | PTGER4       | prostaglandin E receptor 4 (subtype EP4)                                                                     | ns                 | -4.1   | 3.3    |
|   |   |   | ARL4D        | ADP-ribosylation factor like GTPase 4D                                                                       | ns                 | -4.1   | 3.3    |
|   |   |   | PTGDR        | prostaglandin D2 receptor (DP)                                                                               | ns                 | -4.1   | 3.6    |
|   |   |   | GNPDA2       | glucosamine-6-phosphate deaminase 2                                                                          | ns                 | -3.2   | 4.1    |
|   |   |   | FAP          | fibroblast activation protein alpha                                                                          | ns                 | -3.7   | 4.1    |
|   |   |   | ZNF667-AS1   | ZNF667 antisense RNA 1 (head to head)                                                                        | ns                 | -2.8   | 4.1    |
|   |   |   | APCDD1       | adenomatosis polyposis coli down-regulated 1                                                                 | ns                 | -3.9   | 4.1    |
|   |   |   | FYN          | FYN proto-oncogene, Src family tyrosine kinase                                                               | ns                 | -3.7   | 4.1    |
|   |   |   | CFD          | complement factor D (adipsin)                                                                                | ns                 | -3.5   | 4.0    |
|   |   |   | ARMC9        | armadillo repeat containing 9                                                                                | ns                 | -3.3   | 4.0    |
|   |   |   | RRAS         | related RAS viral (r-ras) oncogene homolog                                                                   | ns                 | -4.0   | 3.0    |
|   |   |   | ARHGAP15     | Rho GTPase activating protein 15                                                                             | ns                 | -3.2   | 4.0    |
|   |   |   | MSR1         | macrophage scavenger receptor 1                                                                              | ns                 | -4.0   | 2.9    |
|   |   |   | INPP4B       | inositol polyphosphate-4-phosphatase type II B                                                               | ns                 | -3.9   | 3.1    |
|   |   |   | KIR2DL4      | killer cell immunoglobulin-like receptor, two domains, long cytoplasmic tail, 4                              | ns                 | -3.9   | 3.8    |
|   |   |   | CXCL12       | chemokine (C-X-C motif) ligand 12                                                                            | ns                 | -3.9   | 3.0    |
|   |   |   | XGY2         | Xg pseudogene, Y-linked 2                                                                                    | ns                 | -3.7   | 3.9    |
|   |   |   | CILP         | cartilage intermediate layer protein, nucleotide pyrophosphohydrolase                                        | ns                 | -3.9   | 3.1    |
|   |   |   | SLC25A30     | solute carrier family 25, member 30                                                                          | ns                 | -3.9   | 2.3    |
|   |   |   | TRGC2        | T cell receptor gamma constant 2                                                                             | ns                 | -3.2   | 3.9    |
|   |   |   | TRGV9        | T cell receptor gamma variable 9                                                                             | ns                 | -3.2   | 3.9    |
|   |   |   | TIMP4        | TIMP metalloproteinase inhibitor 4                                                                           | ns                 | -3.9   | 2.9    |
|   |   |   | CCL3L3       | chemokine (C-C motif) ligand 3-like 3                                                                        | ns                 | -3.9   | 3.4    |
|   |   |   | IL18         | interleukin 18                                                                                               | ns                 | -3.9   | 3.4    |
|   |   |   | PLA1A        | phospholipase A1 member A                                                                                    | ns                 | -2.8   | 3.9    |
|   |   |   | PIK3CG       | phosphatidylinositol-4,5-bisphosphate 3-kinase, catalytic subunit gamma                                      | ns                 | -3.3   | 3.9    |
|   |   |   | FAM155A      | family with sequence similarity 155, member A                                                                | ns                 | -3.8   | 3.4    |
|   |   |   | BIRC3        | baculoviral IAP repeat containing 3                                                                          | ns                 | -3.8   | 3.0    |
|   |   |   | APBB1IP      | amyloid beta (A4) precursor protein-binding, family B, member 1 interacting protein                          | ns                 | -3.8   | 2.1    |
|   |   |   | SKAP1        | src kinase associated phosphoprotein 1                                                                       | ns                 | -3.8   | 3.2    |
|   |   |   | CD58         | CD58 molecule                                                                                                | ns                 | -2.6   | 3.8    |
|   |   |   | FAM229B      | family with sequence similarity 229, member B                                                                | ns                 | -2.7   | 3.8    |
|   |   |   | CFAP300      | cilia and flagella associated protein 300                                                                    | ns                 | -3.7   | 3.8    |
|   |   |   | AOAH         | acyloxyacyl hydrolase (neutrophil)                                                                           | ns                 | -3.2   | 3.8    |
|   |   |   | CLECL1       | C-type lectin-like 1                                                                                         | ns                 | -3.8   | 3.6    |
|   |   |   | CD209        | CD209 molecule                                                                                               | ns                 | -2.8   | 3.8    |
|   |   |   | GADD45A      | growth arrest and DNA-damage-inducible, alpha                                                                | ns                 | -3.8   | 2.1    |
|   |   |   | SIPA1L2      | signal-induced proliferation-associated 1 like 2                                                             | ns                 | -3.7   | 3.8    |
|   |   |   | IL1B         | interleukin 1 beta                                                                                           | ns                 | -3.1   | 3.8    |
|   |   |   | P2RY10       | purinergic receptor P2Y, G-protein coupled, 10                                                               | ns                 | -3.8   | 2.8    |
|   |   |   | ZNF804A      | zinc finger protein 804A                                                                                     | ns                 | -3.7   | 3.4    |
|   |   |   | PYHIN1       | pyrin and HIN domain family, member 1                                                                        | ns                 | -3.7   | 3.1    |
|   |   |   | NIPAL2       | NIPA-like domain containing 2                                                                                | ns                 | -3.7   | 3.2    |
|   |   |   | LOC102723721 | uncharacterized LOC102723721                                                                                 | ns                 | -3.7   | 3.1    |
|   |   |   | GLIDR        | glioblastoma down-regulated RNA                                                                              | ns                 | -3.0   | 3.7    |
|   |   |   | PAMR1        | peptidase domain containing associated with muscle regeneration 1                                            | ns                 | -3.7   | 3.4    |

| S | C | E | Symbol       | Name                                                                   | Linear Fold Change |        |        |
|---|---|---|--------------|------------------------------------------------------------------------|--------------------|--------|--------|
|   |   |   |              |                                                                        | S vs C             | S vs E | E vs C |
|   |   |   | LOC101928461 | uncharacterized LOC101928461                                           | ns                 | -3.7   | 3.4    |
|   |   |   | IL18R1       | interleukin 18 receptor 1                                              | ns                 | -3.7   | 2.8    |
|   |   |   | MNDA         | myeloid cell nuclear differentiation antigen                           | ns                 | -3.7   | 3.2    |
|   |   |   | SNORA78      | small nucleolar RNA, H                                                 | ns                 | -3.4   | 3.6    |
|   |   |   | UCHL1        | ubiquitin C-terminal hydrolase L1                                      | ns                 | -3.6   | 3.1    |
|   |   |   | TPM2         | tropomyosin 2 (beta)                                                   | ns                 | -3.2   | 3.6    |
|   |   |   | CD48         | CD48 molecule                                                          | ns                 | -3.6   | 3.5    |
|   |   |   | ZNF25        | zinc finger protein 25                                                 | ns                 | -2.8   | 3.6    |
|   |   |   | CDA          | cytidine deaminase                                                     | ns                 | -3.6   | 2.9    |
|   |   |   | KCNH1        | potassium channel, voltage gated eag related subfamily H, member 1     | ns                 | -3.6   | 3.0    |
|   |   |   | PWWP3B       | PWWP domain containing 3B                                              | ns                 | -3.4   | 3.5    |
|   |   |   | NPR1         | natriuretic peptide receptor 1                                         | ns                 | -2.7   | 3.5    |
|   |   |   | SOD2         | superoxide dismutase 2, mitochondrial                                  | ns                 | -3.5   | 2.7    |
|   |   |   | TASL         | TLR adaptor interacting with endolysosomal SLC15A4                     | ns                 | -3.3   | 3.5    |
|   |   |   | TAGAP        | T-cell activation RhoGTPase activating protein                         | ns                 | -2.8   | 3.5    |
|   |   |   | DOCK2        | dedicator of cytokinesis 2                                             | ns                 | -2.6   | 3.5    |
|   |   |   | SEMA3B-AS1   | SEMA3B antisense RNA 1 (head to head)                                  | ns                 | -3.5   | 2.9    |
|   |   |   | MPZL2        | myelin protein zero-like 2                                             | ns                 | -3.3   | 3.5    |
|   |   |   | RASD1        | RAS, dexamethasone-induced 1                                           | ns                 | -3.5   | 2.6    |
|   |   |   | PRPS1        | phosphoribosyl pyrophosphate synthetase 1                              | ns                 | -3.5   | 2.3    |
|   |   |   | MDM1         | Mdm1 nuclear protein                                                   | ns                 | -2.7   | 3.5    |
|   |   |   | OXT          | oxytocin                                                               | ns                 | -3.5   | 2.9    |
|   |   |   | BRINP2       | bone morphogenetic protein                                             | ns                 | -3.5   | 2.2    |
|   |   |   | TNC          | tenascin C                                                             | ns                 | -3.5   | 2.3    |
|   |   |   | C8orf88      | chromosome 8 open reading frame 88                                     | ns                 | -2.6   | 3.5    |
|   |   |   | SLC46A3      | solute carrier family 46, member 3                                     | ns                 | -3.2   | 3.4    |
|   |   |   | EMX2         | empty spiracles homeobox 2                                             | ns                 | -3.4   | 2.8    |
|   |   |   | DNLZ         | DNL-type zinc finger                                                   | ns                 | -3.4   | 2.7    |
|   |   |   | ID4          | inhibitor of DNA binding 4, dominant negative helix-loop-helix protein | ns                 | -3.4   | 3.1    |
|   |   |   | TAGLN        | transgelin                                                             | ns                 | -3.1   | 3.4    |
|   |   |   | SORL1        | sortilin-related receptor, L(DLR class) A repeats containing           | ns                 | -2.8   | 3.4    |
|   |   |   | FOLR2        | folate receptor 2 (fetal)                                              | ns                 | -2.2   | 3.4    |
|   |   |   | POLR1F       | RNA polymerase I subunit F                                             | ns                 | -2.9   | 3.4    |
|   |   |   | TMSB4X       | thymosin beta 4, X-linked                                              | ns                 | -3.4   | 3.3    |
|   |   |   | TRPS1        | trichorhinophalangeal syndrome I                                       | ns                 | -2.4   | 3.4    |
|   |   |   | ZBTB20       | zinc finger and BTB domain containing 20                               | ns                 | -2.2   | 3.4    |
|   |   |   | WDR41        | WD repeat domain 41                                                    | ns                 | -3.4   | 2.9    |
|   |   |   | LOC101928100 | uncharacterized LOC101928100                                           | ns                 | -2.7   | 3.3    |
|   |   |   | TP53I3       | tumor protein p53 inducible protein 3                                  | ns                 | -3.0   | 3.3    |
|   |   |   | ADA2         | adenosine deaminase 2                                                  | ns                 | -2.7   | 3.3    |
|   |   |   | QPCT         | glutamyl-peptide cyclotransferase                                      | ns                 | -3.3   | 3.2    |
|   |   |   | PLAT         | plasminogen activator, tissue                                          | ns                 | -3.3   | 2.7    |
|   |   |   | TNFSF13B     | tumor necrosis factor (ligand) superfamily, member 13b                 | ns                 | -3.0   | 3.3    |
|   |   |   | SPAG1        | sperm associated antigen 1                                             | ns                 | -3.3   | 2.9    |
|   |   |   | ABLIM3       | actin binding LIM protein family, member 3                             | ns                 | -2.7   | 3.2    |
|   |   |   | LINC00924    | long intergenic non-protein coding RNA 924                             | ns                 | -3.2   | 2.8    |
|   |   |   | GSTM5        | glutathione S-transferase mu 5                                         | ns                 | -3.2   | 3.0    |
|   |   |   | ALCAM        | activated leukocyte cell adhesion molecule                             | ns                 | -2.1   | 3.2    |
|   |   |   | NCOA7        | nuclear receptor coactivator 7                                         | ns                 | -3.2   | 3.2    |
|   |   |   | LCP1         | lymphocyte cytosolic protein 1 (L-plastin)                             | ns                 | -2.5   | 3.2    |
|   |   |   | PRSS23       | protease, serine, 23                                                   | ns                 | -3.2   | 3.1    |
|   |   |   | ACSL1        | acyl-CoA synthetase long-chain family member 1                         | ns                 | -2.3   | 3.2    |
|   |   |   | SMIM10       | small integral membrane protein 10                                     | ns                 | -3.2   | 3.2    |
|   |   |   | LSAMP-AS1    | uncharacterized LOC101926903                                           | ns                 | -3.2   | 2.6    |
|   |   |   | SNCAIP       | synuclein alpha interacting protein                                    | ns                 | -3.2   | 2.9    |



| S | C | E | Symbol      | Name                                                                                  | Linear Fold Change |        |        |
|---|---|---|-------------|---------------------------------------------------------------------------------------|--------------------|--------|--------|
|   |   |   |             |                                                                                       | S vs C             | S vs E | E vs C |
|   |   |   | PLD1        | phospholipase D1, phosphatidylcholine-specific                                        | ns                 | -3.2   | 2.6    |
|   |   |   | MCC         | mutated in colorectal cancers                                                         | ns                 | -2.4   | 3.2    |
|   |   |   | ARMCX1      | armadillo repeat containing, X-linked 1                                               | ns                 | -2.2   | 3.2    |
|   |   |   | CLEC2D      | C-type lectin domain family 2, member D                                               | ns                 | -3.2   | 2.6    |
|   |   |   | LGALS1      | lectin, galactoside-binding, soluble, 1                                               | ns                 | -2.7   | 3.2    |
|   |   |   | UG0898H09   | uncharacterized LOC643763                                                             | ns                 | -2.9   | 3.2    |
|   |   |   | SAMHD1      | SAM domain and HD domain 1                                                            | ns                 | -2.7   | 3.2    |
|   |   |   | HLA-DMB     | major histocompatibility complex, class II, DM beta                                   | ns                 | -3.0   | 3.2    |
|   |   |   | MANEA       | mannosidase, endo-alpha                                                               | ns                 | -3.1   | 2.5    |
|   |   |   | JAKMIP2     | janus kinase and microtubule interacting protein 2                                    | ns                 | -3.0   | 3.1    |
|   |   |   | MEF2A       | myocyte enhancer factor 2A                                                            | ns                 | -2.5   | 3.1    |
|   |   |   | C2CD4B      | C2 calcium-dependent domain containing 4B                                             | ns                 | -2.4   | 3.1    |
|   |   |   | MIR99AHG    | mir-99a-let-7c cluster host gene                                                      | ns                 | -2.9   | 3.1    |
|   |   |   | HLA-DPB1    | major histocompatibility complex, class II, DP beta 1                                 | ns                 | -3.1   | 2.4    |
|   |   |   | WNT4        | wingless-type MMTV integration site family, member 4                                  | ns                 | -3.1   | 2.2    |
|   |   |   | C1RL        | complement component 1, r subcomponent-like                                           | ns                 | -3.1   | 2.2    |
|   |   |   | PRXL2A      | peroxiredoxin like 2A                                                                 | ns                 | -2.5   | 3.1    |
|   |   |   | EVI2B       | ecotropic viral integration site 2B                                                   | ns                 | -3.0   | 3.1    |
|   |   |   | RCBTB1      | regulator of chromosome condensation (RCC1) and BTB (POZ) domain containing protein 1 | ns                 | -3.1   | 2.3    |
|   |   |   | KATNAL1     | katanin p60 subunit A-like 1                                                          | ns                 | -2.5   | 3.1    |
|   |   |   | MID2        | midline 2                                                                             | ns                 | -2.2   | 3.1    |
|   |   |   | ADAMTS2     | ADAM metalloproteinase with thrombospondin type 1 motif 2                             | ns                 | -2.9   | 3.0    |
|   |   |   | INE2        | inactivation escape 2 (non-protein coding)                                            | ns                 | -3.0   | 2.3    |
|   |   |   | KCNK6       | potassium channel, two pore domain subfamily K, member 6                              | ns                 | -2.8   | 3.0    |
|   |   |   | GALNT13     | polypeptide N-acetylgalactosaminyltransferase 13                                      | ns                 | -3.0   | 2.4    |
|   |   |   | PTGDS       | prostaglandin D2 synthase 21kDa (brain)                                               | ns                 | -3.0   | 2.3    |
|   |   |   | RAI2        | retinoic acid induced 2                                                               | ns                 | -3.0   | 2.3    |
|   |   |   | SIGLEC7     | sialic acid binding Ig-like lectin 7                                                  | ns                 | -2.3   | 3.0    |
|   |   |   | EDNRB       | endothelin receptor type B                                                            | ns                 | -3.0   | 2.2    |
|   |   |   | MSANTD4     | Myb                                                                                   | ns                 | -2.5   | 3.0    |
|   |   |   | CLEC14A     | C-type lectin domain family 14, member A                                              | ns                 | -2.4   | 3.0    |
|   |   |   | FBLN2       | fibulin 2                                                                             | ns                 | -3.0   | 2.4    |
|   |   |   | S100A16     | S100 calcium binding protein A16                                                      | ns                 | -2.3   | 3.0    |
|   |   |   | CYBRD1      | cytochrome b reductase 1                                                              | ns                 | -2.8   | 3.0    |
|   |   |   | FAM155A-IT1 | FAM155A intronic transcript 1                                                         | ns                 | -3.0   | 2.8    |
|   |   |   | CORIN       | corin, serine peptidase                                                               | ns                 | -2.9   | 3.0    |
|   |   |   | MLLT11      | myeloid                                                                               | ns                 | -3.0   | 2.9    |
|   |   |   | TMEM220     | transmembrane protein 220                                                             | ns                 | -3.0   | 2.7    |
|   |   |   | RGL1        | ral guanine nucleotide dissociation stimulator-like 1                                 | ns                 | -2.1   | 3.0    |
|   |   |   | SAMD3       | sterile alpha motif domain containing 3                                               | ns                 | -3.0   | 2.1    |
|   |   |   | EPHX4       | epoxide hydrolase 4                                                                   | ns                 | -2.3   | 3.0    |
|   |   |   | DNASE1L3    | deoxyribonuclease I-like 3                                                            | ns                 | -3.0   | 2.2    |
|   |   |   | NFE2L1      | nuclear factor, erythroid 2-like 1                                                    | ns                 | -2.9   | 2.4    |
|   |   |   | KIR2DS3     | killer cell immunoglobulin-like receptor, two domains, short cytoplasmic tail, 3      | ns                 | -2.9   | 2.5    |
|   |   |   | ITGAX       | integrin alpha X                                                                      | ns                 | -2.9   | 2.8    |
|   |   |   | HAVCR2      | hepatitis A virus cellular receptor 2                                                 | ns                 | -2.2   | 2.9    |
|   |   |   | CRYZ        | crystallin zeta                                                                       | ns                 | -2.4   | 2.9    |
|   |   |   | NR1D1       | nuclear receptor subfamily 1, group D, member 1                                       | ns                 | -2.9   | 2.8    |
|   |   |   | TTC30A      | tetratricopeptide repeat domain 30A                                                   | ns                 | -2.9   | 2.9    |
|   |   |   | EOGT        | EGF domain-specific O-linked N-acetylglucosamine (GlcNAc) transferase                 | ns                 | -2.1   | 2.9    |
|   |   |   | KALRN       | kalirin, RhoGEF kinase                                                                | ns                 | -2.3   | 2.8    |
|   |   |   | SMOX        | spermine oxidase                                                                      | ns                 | -2.8   | 2.8    |
|   |   |   | OSBPL1A     | oxysterol binding protein-like 1A                                                     | ns                 | -2.2   | 2.8    |
|   |   |   | CFL2        | cofilin 2 (muscle)                                                                    | ns                 | -2.8   | 2.3    |
|   |   |   | DNAAF4      | dynein axonemal assembly factor 4                                                     | ns                 | -2.4   | 2.8    |

| S | C | E | Symbol       | Name                                                                                                          | Linear Fold Change |        |        |
|---|---|---|--------------|---------------------------------------------------------------------------------------------------------------|--------------------|--------|--------|
|   |   |   |              |                                                                                                               | S vs C             | S vs E | E vs C |
|   |   |   | RNF138P1     | ring finger protein 138, E3 ubiquitin protein ligase pseudogene 1                                             | ns                 | -2.5   | 2.8    |
|   |   |   | IRS2         | insulin receptor substrate 2                                                                                  | ns                 | -2.8   | 2.4    |
|   |   |   | LOC105376272 | uncharacterized LOC105376272                                                                                  | ns                 | -2.6   | 2.8    |
|   |   |   | ARL3         | ADP-ribosylation factor like GTPase 3                                                                         | ns                 | -2.8   | 2.3    |
|   |   |   | CCL3         | chemokine (C-C motif) ligand 3                                                                                | ns                 | -2.3   | 2.8    |
|   |   |   | S1PR4        | sphingosine-1-phosphate receptor 4                                                                            | ns                 | -2.2   | 2.8    |
|   |   |   | FAM110C      | family with sequence similarity 110, member C                                                                 | ns                 | -2.4   | 2.8    |
|   |   |   | HLA-DMA      | major histocompatibility complex, class II, DM alpha                                                          | ns                 | -2.7   | 2.0    |
|   |   |   | NIBAN1       | niban apoptosis regulator 1                                                                                   | ns                 | -2.7   | 2.2    |
|   |   |   | LOC100507195 | uncharacterized LOC100507195                                                                                  | ns                 | -2.7   | 2.4    |
|   |   |   | ZNF287       | zinc finger protein 287                                                                                       | ns                 | -2.2   | 2.7    |
|   |   |   | NUPR1        | nuclear protein 1, transcriptional regulator                                                                  | ns                 | -2.7   | 2.3    |
|   |   |   | ATP2B4       | ATPase, Ca <sup>++</sup> transporting, plasma membrane 4                                                      | ns                 | -2.5   | 2.7    |
|   |   |   | TMEM98       | transmembrane protein 98                                                                                      | ns                 | -2.3   | 2.7    |
|   |   |   | TMEM35B      | transmembrane protein 35B                                                                                     | ns                 | -2.5   | 2.7    |
|   |   |   | C15orf65     | chromosome 15 open reading frame 65                                                                           | ns                 | -2.1   | 2.7    |
|   |   |   | CELF2        | CUGBP, Elav-like family member 2                                                                              | ns                 | -2.5   | 2.7    |
|   |   |   | CERK         | ceramide kinase                                                                                               | ns                 | -2.7   | 2.2    |
|   |   |   | TLR6         | toll-like receptor 6                                                                                          | ns                 | -2.5   | 2.7    |
|   |   |   | SLFN12       | schlafen family member 12                                                                                     | ns                 | -2.7   | 2.4    |
|   |   |   | GJA1         | gap junction protein alpha 1                                                                                  | ns                 | -2.7   | 2.6    |
|   |   |   | IL2RA        | interleukin 2 receptor, alpha                                                                                 | ns                 | -2.7   | 2.6    |
|   |   |   | ZNF438       | zinc finger protein 438                                                                                       | ns                 | -2.6   | 2.2    |
|   |   |   | HLA-A        | major histocompatibility complex, class I, A                                                                  | ns                 | -2.6   | 2.2    |
|   |   |   | SOD3         | superoxide dismutase 3, extracellular                                                                         | ns                 | -2.6   | 2.6    |
|   |   |   | CHST2        | carbohydrate (N-acetylglucosamine-6-O) sulfotransferase 2                                                     | ns                 | -2.1   | 2.6    |
|   |   |   | ZNF516       | zinc finger protein 516                                                                                       | ns                 | -2.6   | 2.5    |
|   |   |   | RBKS         | ribokinase                                                                                                    | ns                 | -2.6   | 2.3    |
|   |   |   | C1orf162     | chromosome 1 open reading frame 162                                                                           | ns                 | -2.2   | 2.6    |
|   |   |   | MRPL33       | mitochondrial ribosomal protein L33                                                                           | ns                 | -2.6   | 2.3    |
|   |   |   | CDKN2C       | cyclin-dependent kinase inhibitor 2C (p18, inhibits CDK4)                                                     | ns                 | -2.1   | 2.6    |
|   |   |   | KANK2        | KN motif and ankyrin repeat domains 2                                                                         | ns                 | -2.6   | 2.5    |
|   |   |   | GLB1L        | galactosidase beta 1 like                                                                                     | ns                 | -2.6   | 2.0    |
|   |   |   | CH25H        | cholesterol 25-hydroxylase                                                                                    | ns                 | -2.6   | 2.5    |
|   |   |   | ALDH3A2      | aldehyde dehydrogenase 3 family, member A2                                                                    | ns                 | -2.3   | 2.6    |
|   |   |   | PLXNC1       | plexin C1                                                                                                     | ns                 | -2.3   | 2.5    |
|   |   |   | SELPLG       | selectin P ligand                                                                                             | ns                 | -2.1   | 2.5    |
|   |   |   | STAB1        | stabilin 1                                                                                                    | ns                 | -2.0   | 2.5    |
|   |   |   | HLA-DPB2     | major histocompatibility complex, class II, DP beta 2 (pseudogene)                                            | ns                 | -2.5   | 2.1    |
|   |   |   | CACNB2       | calcium channel, voltage-dependent, beta 2 subunit                                                            | ns                 | -2.5   | 2.2    |
|   |   |   | ALKBH3       | alkB homolog 3, alpha-ketoglutarate-dependent dioxygenase                                                     | ns                 | -2.1   | 2.5    |
|   |   |   | LY75-CD302   | LY75-CD302 readthrough                                                                                        | ns                 | -2.5   | 2.3    |
|   |   |   | TGFBR2       | transforming growth factor beta receptor II                                                                   | ns                 | -2.0   | 2.5    |
|   |   |   | XG           | Xg blood group                                                                                                | ns                 | -2.5   | 2.1    |
|   |   |   | ZNF271P      | zinc finger protein 271, pseudogene                                                                           | ns                 | -2.5   | 2.3    |
|   |   |   | GLIPR2       | GLI pathogenesis-related 2                                                                                    | ns                 | -2.4   | 2.5    |
|   |   |   | SCIMP        | SLP adaptor and CSK interacting membrane protein                                                              | ns                 | -2.3   | 2.5    |
|   |   |   | EFEMP2       | EGF containing fibulin-like extracellular matrix protein 2                                                    | ns                 | -2.0   | 2.5    |
|   |   |   | ST6GALNAC6   | ST6 (alpha-N-acetyl-neuraminyl-2,3-beta-galactosyl-1,3)-N-acetylgalactosaminide alpha-2,6-sialyltransferase 6 | ns                 | -2.4   | 2.4    |
|   |   |   | LARGE1       | LARGE xylosyl- and glucuronyltransferase 1                                                                    | ns                 | -2.2   | 2.4    |
|   |   |   | ADCY1        | adenylate cyclase 1 (brain)                                                                                   | ns                 | -2.1   | 2.4    |
|   |   |   | LOC105372674 | uncharacterized LOC105372674                                                                                  | ns                 | -2.4   | 2.4    |
|   |   |   | SSC5D        | scavenger receptor cysteine rich family, 5 domains                                                            | ns                 | -2.3   | 2.4    |
|   |   |   | TMX4         | thioredoxin-related transmembrane protein 4                                                                   | ns                 | -2.1   | 2.4    |
|   |   |   | PBX3         | pre-B-cell leukemia homeobox 3                                                                                | ns                 | -2.1   | 2.4    |

| S | C | E | Symbol       | Name                                                                         | Linear Fold Change |        |        |
|---|---|---|--------------|------------------------------------------------------------------------------|--------------------|--------|--------|
|   |   |   |              |                                                                              | S vs C             | S vs E | E vs C |
|   |   |   | RIN2         | Ras and Rab interactor 2                                                     | ns                 | -2.3   | 2.4    |
|   |   |   | TCN2         | transcobalamin II                                                            | ns                 | -2.2   | 2.4    |
|   |   |   | TRGV8        | T cell receptor gamma variable 8                                             | ns                 | -2.4   | 2.2    |
|   |   |   | IMPA1        | inositol(myo)-1(or 4)-monophosphatase 1                                      | ns                 | -2.3   | 2.4    |
|   |   |   | KRT37        | keratin 37, type I                                                           | ns                 | -2.4   | 2.3    |
|   |   |   | SIGLEC14     | sialic acid binding Ig-like lectin 14                                        | ns                 | -2.3   | 2.1    |
|   |   |   | BMERB1       | bMERB domain containing 1                                                    | ns                 | -2.3   | 2.2    |
|   |   |   | SNAP91       | synaptosome associated protein 91kDa                                         | ns                 | -2.2   | 2.3    |
|   |   |   | SGPL1        | sphingosine-1-phosphate lyase 1                                              | ns                 | -2.3   | 2.3    |
|   |   |   | RNASET2      | ribonuclease T2                                                              | ns                 | -2.3   | 2.1    |
|   |   |   | FCGR2A       | Fc fragment of IgG, low affinity IIa, receptor (CD32)                        | ns                 | -2.2   | 2.3    |
|   |   |   | DNAJC12      | DnaJ (Hsp40) homolog, subfamily C, member 12                                 | ns                 | -2.3   | 2.2    |
|   |   |   | ICAM1        | intercellular adhesion molecule 1                                            | ns                 | -2.3   | 2.3    |
|   |   |   | NECTIN2      | nectin cell adhesion molecule 2                                              | ns                 | -2.3   | 2.1    |
|   |   |   | TARS3        | threonyl-tRNA synthetase 3                                                   | ns                 | -2.3   | 2.2    |
|   |   |   | CTSD         | cathepsin D                                                                  | ns                 | -2.2   | 2.3    |
|   |   |   | CD83         | CD83 molecule                                                                | ns                 | -2.1   | 2.3    |
|   |   |   | ATL1         | atlastin GTPase 1                                                            | ns                 | -2.3   | 2.1    |
|   |   |   | AKAP6        | A kinase (PRKA) anchor protein 6                                             | ns                 | -2.2   | 2.2    |
|   |   |   | PLLP         | plasmalipin                                                                  | ns                 | -2.2   | 2.2    |
|   |   |   | GANC         | glucosidase, alpha; neutral C                                                | ns                 | -2.2   | 2.0    |
|   |   |   | PRNP         | prion protein                                                                | ns                 | -2.1   | 2.1    |
|   |   |   | PLXND1       | plexin D1                                                                    | ns                 | -2.1   | 2.1    |
|   |   |   | HCK          | HCK proto-oncogene, Src family tyrosine kinase                               | ns                 | -2.1   | 2.1    |
|   |   |   | PLXNA4       | plexin A4                                                                    | ns                 | -2.1   | 2.1    |
|   |   |   | ASAP2        | ArfGAP with SH3 domain, ankyrin repeat and PH domain 2                       | ns                 | -2.1   | 2.0    |
|   |   |   | PIRC66       | piwi-interacting RNA cluster 66                                              | ns                 | 151.3  | -86.8  |
|   |   |   | CGB8         | chorionic gonadotropin, beta polypeptide 8                                   | ns                 | 89.1   | -106.9 |
|   |   |   | BMP5         | bone morphogenetic protein 5                                                 | ns                 | 86.0   | -21.1  |
|   |   |   | F5           | coagulation factor V (proaccelerin, labile factor)                           | ns                 | 74.3   | -20.0  |
|   |   |   | EGFL6        | EGF-like-domain, multiple 6                                                  | ns                 | 70.0   | -15.5  |
|   |   |   | CYP19A1      | cytochrome P450, family 19, subfamily A, polypeptide 1                       | ns                 | 61.7   | -29.4  |
|   |   |   | MIR1323      | microRNA 1323                                                                | ns                 | 47.1   | -30.7  |
|   |   |   | LGALS13      | lectin, galactoside-binding, soluble, 13                                     | ns                 | 43.7   | -16.5  |
|   |   |   | CGB3         | chorionic gonadotropin subunit beta 3                                        | ns                 | 23.5   | -33.7  |
|   |   |   | LGALS16      | lectin, galactoside-binding, soluble, 16                                     | ns                 | 29.7   | -12.0  |
|   |   |   | HSD3B1       | hydroxy-delta-5-steroid dehydrogenase, 3 beta- and steroid delta-isomerase 1 | ns                 | 29.7   | -12.6  |
|   |   |   | DSC3         | desmocollin 3                                                                | ns                 | 27.2   | -21.8  |
|   |   |   | TFPI2        | tissue factor pathway inhibitor 2                                            | ns                 | 26.0   | -18.3  |
|   |   |   | HGF          | hepatocyte growth factor (hepapoietin A; scatter factor)                     | ns                 | 24.1   | -7.8   |
|   |   |   | PAGE4        | P antigen family, member 4 (prostate associated)                             | ns                 | 19.2   | -10.6  |
|   |   |   | DLK1         | delta-like 1 homolog (Drosophila)                                            | ns                 | 17.7   | -9.6   |
|   |   |   | MUC15        | mucin 15, cell surface associated                                            | ns                 | 16.9   | -10.2  |
|   |   |   | C21orf91-OT1 | C21orf91 overlapping transcript 1                                            | ns                 | 16.5   | -4.3   |
|   |   |   | ANGPT2       | angiopoietin 2                                                               | ns                 | 15.9   | -6.4   |
|   |   |   | CDO1         | cysteine dioxygenase type 1                                                  | ns                 | 15.4   | -9.9   |
|   |   |   | SPTLC3       | serine palmitoyltransferase, long chain base subunit 3                       | ns                 | 14.1   | -7.7   |
|   |   |   | ERVW-1       | endogenous retrovirus group W, member 1                                      | ns                 | 13.6   | -6.9   |
|   |   |   | OLAH         | oleoyl-ACP hydrolase                                                         | ns                 | 13.3   | -6.1   |
|   |   |   | STS          | steroid sulfatase (microsomal), isozyme S                                    | ns                 | 12.9   | -5.5   |
|   |   |   | RHOBTB1      | Rho-related BTB domain containing 1                                          | ns                 | 12.7   | -5.6   |
|   |   |   | RRS1-AS1     | RRS1 antisense RNA 1 (head to head)                                          | ns                 | 12.5   | -6.0   |
|   |   |   | SLC19A3      | solute carrier family 19 (thiamine transporter), member 3                    | ns                 | 12.3   | -7.1   |
|   |   |   | KATNBL1      | katanin p80 subunit B-like 1                                                 | ns                 | 12.1   | -4.5   |
|   |   |   | SIGLEC6      | sialic acid binding Ig-like lectin 6                                         | ns                 | 9.8    | -12.1  |

| S | C | E | Symbol       | Name                                                                  | Linear Fold Change |        |        |
|---|---|---|--------------|-----------------------------------------------------------------------|--------------------|--------|--------|
|   |   |   |              |                                                                       | S vs C             | S vs E | E vs C |
|   |   |   | LOC729739    | peptidylprolyl isomerase A (cyclophilin A) pseudogene                 | ns                 | 11.9   | -8.3   |
|   |   |   | PRSS12       | protease, serine, 12 (neurotrypsin, motopsin)                         | ns                 | 9.0    | -11.7  |
|   |   |   | ADAMTS6      | ADAM metalloproteinase with thrombospondin type 1 motif 6             | ns                 | 11.7   | -4.7   |
|   |   |   | RADX         | RPA1 related single stranded DNA binding protein, X-linked            | ns                 | 11.6   | -5.0   |
|   |   |   | PCDH10       | protocadherin 10                                                      | ns                 | 11.5   | -5.0   |
|   |   |   | LOC55338     | uncharacterized LOC55338                                              | ns                 | 11.1   | -6.4   |
|   |   |   | CYP2J2       | cytochrome P450, family 2, subfamily J, polypeptide 2                 | ns                 | 7.0    | -11.0  |
|   |   |   | ATP6V1C2     | ATPase, H <sup>+</sup> transporting, lysosomal 42kDa, V1 subunit C2   | ns                 | 10.8   | -6.0   |
|   |   |   | CSF3R        | colony stimulating factor 3 receptor                                  | ns                 | 10.8   | -5.6   |
|   |   |   | PEG3-AS1     | PEG3 antisense RNA 1                                                  | ns                 | 10.4   | -7.8   |
|   |   |   | GLDN         | gliomedin                                                             | ns                 | 10.4   | -4.8   |
|   |   |   | PEG3         | paternally expressed 3                                                | ns                 | 10.0   | -6.5   |
|   |   |   | C7           | complement component 7                                                | ns                 | 9.9    | -5.5   |
|   |   |   | KYNU         | kynureninase                                                          | ns                 | 9.9    | -3.8   |
|   |   |   | LOC101927355 | uncharacterized LOC101927355                                          | ns                 | 9.5    | -3.6   |
|   |   |   | LOC284561    | uncharacterized LOC284561                                             | ns                 | 9.5    | -4.3   |
|   |   |   | SPINT1       | serine peptidase inhibitor, Kunitz type 1                             | ns                 | 9.4    | -6.8   |
|   |   |   | MIR498       | microRNA 498                                                          | ns                 | 9.3    | -7.8   |
|   |   |   | FOXO4        | forkhead box O4                                                       | ns                 | 9.2    | -4.7   |
|   |   |   | INHBA        | inhibin beta A                                                        | ns                 | 6.2    | -9.1   |
|   |   |   | ERVH48-1     | endogenous retrovirus group 48, member 1                              | ns                 | 7.9    | -8.3   |
|   |   |   | SLC19A2      | solute carrier family 19 (thiamine transporter), member 2             | ns                 | 7.9    | -5.6   |
|   |   |   | TP63         | tumor protein p63                                                     | ns                 | 7.9    | -4.8   |
|   |   |   | FHDC1        | FH2 domain containing 1                                               | ns                 | 7.9    | -5.7   |
|   |   |   | TREML2       | triggering receptor expressed on myeloid cells-like 2                 | ns                 | 7.8    | -3.2   |
|   |   |   | KRT23        | keratin 23, type I                                                    | ns                 | 7.5    | -4.8   |
|   |   |   | PSG5         | pregnancy specific beta-1-glycoprotein 5                              | ns                 | 7.5    | -3.2   |
|   |   |   | PSG1         | pregnancy specific beta-1-glycoprotein 1                              | ns                 | 6.9    | -4.0   |
|   |   |   | LOC100505909 | uncharacterized LOC100505909                                          | ns                 | 6.8    | -5.1   |
|   |   |   | LINC00470    | long intergenic non-protein coding RNA 470                            | ns                 | 6.7    | -4.9   |
|   |   |   | CMYA5        | cardiomyopathy associated 5                                           | ns                 | 6.5    | -3.5   |
|   |   |   | LOC101927880 | uncharacterized LOC101927880                                          | ns                 | 6.3    | -6.5   |
|   |   |   | ARHGAP32     | Rho GTPase activating protein 32                                      | ns                 | 6.5    | -2.9   |
|   |   |   | TLR3         | toll-like receptor 3                                                  | ns                 | 6.1    | -6.4   |
|   |   |   | ERVK3-2      | endogenous retrovirus group K3, member 2                              | ns                 | 6.4    | -5.0   |
|   |   |   | SPDYA        | speedy                                                                | ns                 | 6.3    | -4.7   |
|   |   |   | RPS6KA5      | ribosomal protein S6 kinase, 90kDa, polypeptide 5                     | ns                 | 6.1    | -3.5   |
|   |   |   | ZNF732       | zinc finger protein 732                                               | ns                 | 2.5    | -6.0   |
|   |   |   | OPHN1        | oligophrenin 1                                                        | ns                 | 5.9    | -3.0   |
|   |   |   | PLEKHA8P1    | pleckstrin homology domain containing, family A member 8 pseudogene 1 | ns                 | 4.2    | -5.9   |
|   |   |   | LOC105375403 | uncharacterized LOC105375403                                          | ns                 | 5.9    | -2.9   |
|   |   |   | LOC105377871 | uncharacterized LOC105377871                                          | ns                 | 5.9    | -5.0   |
|   |   |   | GLDC         | glycine dehydrogenase (decarboxylating)                               | ns                 | 5.6    | -4.8   |
|   |   |   | GDF15        | growth differentiation factor 15                                      | ns                 | 5.5    | -4.3   |
|   |   |   | DTL          | denticleless E3 ubiquitin protein ligase homolog (Drosophila)         | ns                 | 5.5    | -4.9   |
|   |   |   | ATP10D       | ATPase, class V, type 10D                                             | ns                 | 5.5    | -2.7   |
|   |   |   | DOCK9-AS1    | DOCK9 antisense RNA 1                                                 | ns                 | 5.4    | -4.2   |
|   |   |   | BET1         | Bet1 golgi vesicular membrane trafficking protein                     | ns                 | 5.4    | -2.5   |
|   |   |   | CAPN6        | calpain 6                                                             | ns                 | 5.4    | -4.5   |
|   |   |   | SDC1         | syndecan 1                                                            | ns                 | 5.2    | -2.6   |
|   |   |   | FAM13A       | family with sequence similarity 13, member A                          | ns                 | 5.1    | -3.1   |
|   |   |   | LARGE2       | LARGE xylosyl- and glucuronyltransferase 2                            | ns                 | 5.1    | -3.3   |
|   |   |   | CEMIP2       | cell migration inducing hyaluronidase 2                               | ns                 | 5.1    | -2.3   |
|   |   |   | RNF128       | ring finger protein 128, E3 ubiquitin protein ligase                  | ns                 | 5.1    | -4.5   |
|   |   |   | GPR87        | G protein-coupled receptor 87                                         | ns                 | 2.9    | -5.0   |



| S | C | E | Symbol       | Name                                                                             | Linear Fold Change |        |        |
|---|---|---|--------------|----------------------------------------------------------------------------------|--------------------|--------|--------|
|   |   |   |              |                                                                                  | S vs C             | S vs E | E vs C |
|   |   |   | SPDYE11      | speedy                                                                           | ns                 | 4.9    | -3.2   |
|   |   |   | SPDYE8       | speedy/RINGO cell cycle regulator family member E8                               | ns                 | 4.9    | -3.2   |
|   |   |   | NEBL         | nebullette                                                                       | ns                 | 4.9    | -4.4   |
|   |   |   | SLC7A5       | solute carrier family 7 (amino acid transporter light chain, L system), member 5 | ns                 | 3.8    | -4.8   |
|   |   |   | SLC22A11     | solute carrier family 22 (organic anion                                          | ns                 | 4.8    | -3.0   |
|   |   |   | MTARC1       | mitochondrial amidoxime reducing component 1                                     | ns                 | 4.7    | -3.5   |
|   |   |   | CCNB1        | cyclin B1                                                                        | ns                 | 3.4    | -4.7   |
|   |   |   | DEPDC1       | DEP domain containing 1                                                          | ns                 | 4.6    | -4.2   |
|   |   |   | TPRXL        | tetra-peptide repeat homeobox-like                                               | ns                 | 4.6    | -3.6   |
|   |   |   | FDX1         | ferredoxin 1                                                                     | ns                 | 4.5    | -3.0   |
|   |   |   | LOC101928408 | uncharacterized LOC101928408                                                     | ns                 | 4.5    | -2.4   |
|   |   |   | TOP2A        | topoisomerase (DNA) II alpha                                                     | ns                 | 4.4    | -3.1   |
|   |   |   | ATP6V1B1     | ATPase, H <sup>+</sup> transporting, lysosomal 56                                | ns                 | 4.4    | -2.6   |
|   |   |   | DIAPH3       | diaphanous-related formin 3                                                      | ns                 | 2.8    | -4.4   |
|   |   |   | GAB1         | GRB2-associated binding protein 1                                                | ns                 | 4.4    | -3.2   |
|   |   |   | ANLN         | anillin actin binding protein                                                    | ns                 | 2.9    | -4.4   |
|   |   |   | LOC105377872 | uncharacterized LOC105377872                                                     | ns                 | 3.0    | -4.3   |
|   |   |   | ST8SIA6-AS1  | ST8SIA6 antisense RNA 1                                                          | ns                 | 4.3    | -2.9   |
|   |   |   | TYMS         | thymidylate synthetase                                                           | ns                 | 4.3    | -2.2   |
|   |   |   | CLIP1        | CAP-GLY domain containing linker protein 1                                       | ns                 | 4.3    | -2.1   |
|   |   |   | MBNL3        | muscleblind-like splicing regulator 3                                            | ns                 | 4.2    | -3.0   |
|   |   |   | TMEM40       | transmembrane protein 40                                                         | ns                 | 4.2    | -2.8   |
|   |   |   | LOC105378019 | uncharacterized LOC105378019                                                     | ns                 | 4.2    | -2.6   |
|   |   |   | ZNF292       | zinc finger protein 292                                                          | ns                 | 4.2    | -2.9   |
|   |   |   | ZFAT-AS1     | ZFAT antisense RNA 1                                                             | ns                 | 4.2    | -2.3   |
|   |   |   | HS3ST3B1     | heparan sulfate (glucosamine) 3-O-sulfotransferase 3B1                           | ns                 | 4.1    | -2.3   |
|   |   |   | NEDD4L       | neural precursor cell expressed, developmentally down-regulated 4-like           | ns                 | 4.1    | -2.5   |
|   |   |   | TNS4         | tensin 4                                                                         | ns                 | 3.4    | -4.1   |
|   |   |   | FXYD3        | FXYD domain containing ion transport regulator 3                                 | ns                 | 4.0    | -2.3   |
|   |   |   | MEST         | mesoderm specific transcript                                                     | ns                 | 4.0    | -2.4   |
|   |   |   | LOC105376910 | uncharacterized LOC105376910                                                     | ns                 | 4.0    | -3.2   |
|   |   |   | MET          | MET proto-oncogene, receptor tyrosine kinase                                     | ns                 | 3.6    | -4.0   |
|   |   |   | GRAMD2A      | GRAM domain containing 2A                                                        | ns                 | 4.0    | -3.0   |
|   |   |   | MB21D2       | Mab-21 domain containing 2                                                       | ns                 | 4.0    | -2.2   |
|   |   |   | SLC38A9      | solute carrier family 38, member 9                                               | ns                 | 3.4    | -4.0   |
|   |   |   | LOC105379521 | uncharacterized LOC105379521                                                     | ns                 | 4.0    | -3.8   |
|   |   |   | LINC01194    | long intergenic non-protein coding RNA 1194                                      | ns                 | 2.2    | -3.9   |
|   |   |   | ITGB4        | integrin beta 4                                                                  | ns                 | 3.2    | -3.9   |
|   |   |   | TENM3        | teneurin transmembrane protein 3                                                 | ns                 | 3.9    | -3.7   |
|   |   |   | CCNA2        | cyclin A2                                                                        | ns                 | 3.9    | -3.0   |
|   |   |   | CDK2         | cyclin-dependent kinase 2                                                        | ns                 | 3.8    | -3.6   |
|   |   |   | STK26        | serine                                                                           | ns                 | 3.8    | -2.3   |
|   |   |   | SLC38A1      | solute carrier family 38, member 1                                               | ns                 | 3.8    | -2.6   |
|   |   |   | SLC2A1       | solute carrier family 2 (facilitated glucose transporter), member 1              | ns                 | 3.7    | -3.8   |
|   |   |   | CCSAP        | centriole, cilia and spindle-associated protein                                  | ns                 | 2.8    | -3.8   |
|   |   |   | CYP11A1      | cytochrome P450, family 11, subfamily A, polypeptide 1                           | ns                 | 3.7    | -3.1   |
|   |   |   | WEE1         | WEE1 G2 checkpoint kinase                                                        | ns                 | 2.1    | -3.7   |
|   |   |   | ZNF750       | zinc finger protein 750                                                          | ns                 | 3.7    | -2.3   |
|   |   |   | DPP4         | dipeptidyl-peptidase 4                                                           | ns                 | 3.1    | -3.7   |
|   |   |   | SLC5A6       | solute carrier family 5 (sodium                                                  | ns                 | 3.7    | -2.8   |
|   |   |   | FERMT1       | fermitin family member 1                                                         | ns                 | 3.4    | -3.7   |
|   |   |   | CLN3         | ceroid-lipofuscinosis, neuronal 3                                                | ns                 | 2.8    | -3.7   |
|   |   |   | PCOLCE2      | procollagen C-endopeptidase enhancer 2                                           | ns                 | 3.6    | -2.9   |
|   |   |   | NCOA3        | nuclear receptor coactivator 3                                                   | ns                 | 3.6    | -2.2   |
|   |   |   | LOC105377943 | uncharacterized LOC105377943                                                     | ns                 | 3.6    | -3.0   |

| S | C | E | Symbol       | Name                                                                      | Linear Fold Change |        |        |
|---|---|---|--------------|---------------------------------------------------------------------------|--------------------|--------|--------|
|   |   |   |              |                                                                           | S vs C             | S vs E | E vs C |
|   |   |   | FIGN         | fidgetin                                                                  | ns                 | 3.6    | -2.7   |
|   |   |   | EBLN2        | endogenous Bornavirus-like nucleoprotein 2                                | ns                 | 3.6    | -2.5   |
|   |   |   | TBX20        | T-box 20                                                                  | ns                 | 3.6    | -2.5   |
|   |   |   | PGAP1        | post-GPI attachment to proteins 1                                         | ns                 | 3.6    | -2.8   |
|   |   |   | PHLPP1       | PH domain and leucine rich repeat protein phosphatase 1                   | ns                 | 3.6    | -2.3   |
|   |   |   | GDA          | guanine deaminase                                                         | ns                 | 3.6    | -3.6   |
|   |   |   | SLC29A1      | solute carrier family 29 (equilibrative nucleoside transporter), member 1 | ns                 | 2.3    | -3.6   |
|   |   |   | PARD6B       | par-6 family cell polarity regulator beta                                 | ns                 | 3.5    | -3.0   |
|   |   |   | RFC3         | replication factor C subunit 3                                            | ns                 | 3.0    | -3.5   |
|   |   |   | FAM156B      | family with sequence similarity 156, member B                             | ns                 | 3.4    | -2.6   |
|   |   |   | TFAP2A-AS1   | TFAP2A antisense RNA 1                                                    | ns                 | 3.4    | -3.2   |
|   |   |   | SMAD4        | SMAD family member 4                                                      | ns                 | 3.4    | -2.1   |
|   |   |   | ADAM12       | ADAM metalloproteinase domain 12                                          | ns                 | 3.4    | -2.4   |
|   |   |   | KNL1         | kinetochore scaffold 1                                                    | ns                 | 3.2    | -3.4   |
|   |   |   | EXO1         | exonuclease 1                                                             | ns                 | 2.4    | -3.4   |
|   |   |   | IRF6         | interferon regulatory factor 6                                            | ns                 | 3.4    | -2.5   |
|   |   |   | CGA          | glycoprotein hormones, alpha polypeptide                                  | ns                 | 3.4    | -3.0   |
|   |   |   | TEX10        | testis expressed 10                                                       | ns                 | 3.4    | -2.0   |
|   |   |   | RASA1        | RAS p21 protein activator (GTPase activating protein) 1                   | ns                 | 3.4    | -2.5   |
|   |   |   | SNORD16      | small nucleolar RNA, C                                                    | ns                 | 2.2    | -3.3   |
|   |   |   | CCDC162P     | coiled-coil domain containing 162, pseudogene                             | ns                 | 3.3    | -2.5   |
|   |   |   | PIP5K1B      | phosphatidylinositol-4-phosphate 5-kinase, type I, beta                   | ns                 | 3.3    | -2.0   |
|   |   |   | TICRR        | TOPBP1-interacting checkpoint and replication regulator                   | ns                 | 2.9    | -3.3   |
|   |   |   | ST7-OT4      | ST7 overlapping transcript 4                                              | ns                 | 3.3    | -2.1   |
|   |   |   | LOC105376501 | uncharacterized LOC105376501                                              | ns                 | 3.2    | -2.6   |
|   |   |   | SLC52A1      | solute carrier family 52 (riboflavin transporter), member 1               | ns                 | 2.9    | -3.2   |
|   |   |   | IGF2BP3      | insulin-like growth factor 2 mRNA binding protein 3                       | ns                 | 3.2    | -2.5   |
|   |   |   | MAN1A2       | mannosidase, alpha, class 1A, member 2                                    | ns                 | 3.2    | -2.2   |
|   |   |   | ATAD5        | ATPase family, AAA domain containing 5                                    | ns                 | 2.6    | -3.2   |
|   |   |   | SGO1         | shugoshin 1                                                               | ns                 | 3.2    | -2.8   |
|   |   |   | LOC105374160 | uncharacterized LOC105374160                                              | ns                 | 2.2    | -3.2   |
|   |   |   | MYH10        | myosin, heavy chain 10, non-muscle                                        | ns                 | 3.2    | -2.5   |
|   |   |   | COBLL1       | cordon-bleu WH2 repeat protein like 1                                     | ns                 | 3.1    | -2.7   |
|   |   |   | LRRC1        | leucine rich repeat containing 1                                          | ns                 | 2.6    | -3.1   |
|   |   |   | RGPD2        | RANBP2-like and GRIP domain containing 2                                  | ns                 | 3.1    | -2.1   |
|   |   |   | CEP295NL     | CEP295 N-terminal like                                                    | ns                 | 3.1    | -2.9   |
|   |   |   | STC1         | stanniocalcin 1                                                           | ns                 | 2.4    | -3.1   |
|   |   |   | ATP7B        | ATPase, Cu <sup>++</sup> transporting, beta polypeptide                   | ns                 | 3.1    | -2.0   |
|   |   |   | TDRP         | testis development related protein                                        | ns                 | 3.0    | -3.0   |
|   |   |   | UBE2T        | ubiquitin conjugating enzyme E2T                                          | ns                 | 3.0    | -2.5   |
|   |   |   | EML4         | echinoderm microtubule associated protein like 4                          | ns                 | 3.0    | -2.1   |
|   |   |   | CDC6         | cell division cycle 6                                                     | ns                 | 3.0    | -2.8   |
|   |   |   | RDH13        | retinol dehydrogenase 13 (all-trans                                       | ns                 | 3.0    | -3.0   |
|   |   |   | NET1         | neuroepithelial cell transforming 1                                       | ns                 | 2.4    | -3.0   |
|   |   |   | P2RY6        | pyrimidinergic receptor P2Y, G-protein coupled, 6                         | ns                 | 3.0    | -2.3   |
|   |   |   | LINC00540    | long intergenic non-protein coding RNA 540                                | ns                 | 3.0    | -2.0   |
|   |   |   | TPX2         | TPX2, microtubule-associated                                              | ns                 | 3.0    | -2.5   |
|   |   |   | SKP2         | S-phase kinase-associated protein 2, E3 ubiquitin protein ligase          | ns                 | 2.4    | -3.0   |
|   |   |   | CHML         | choroideremia-like (Rab escort protein 2)                                 | ns                 | 2.1    | -3.0   |
|   |   |   | GRHL1        | grainyhead-like transcription factor 1                                    | ns                 | 2.1    | -3.0   |
|   |   |   | S1PR2        | sphingosine-1-phosphate receptor 2                                        | ns                 | 2.5    | -2.9   |
|   |   |   | CCDC169      | coiled-coil domain containing 169                                         | ns                 | 2.3    | -2.9   |
|   |   |   | STEAP4       | STEAP family member 4                                                     | ns                 | 2.9    | -2.7   |
|   |   |   | WDR76        | WD repeat domain 76                                                       | ns                 | 2.9    | -2.4   |
|   |   |   | RFESD        | Rieske (Fe-S) domain containing                                           | ns                 | 2.9    | -2.4   |



| S | C | E | Symbol        | Name                                                                          | Linear Fold Change |        |        |
|---|---|---|---------------|-------------------------------------------------------------------------------|--------------------|--------|--------|
|   |   |   |               |                                                                               | S vs C             | S vs E | E vs C |
|   |   |   | VGLL1         | vestigial-like family member 1                                                | ns                 | 2.9    | -2.6   |
|   |   |   | PROSER1       | proline and serine rich 1                                                     | ns                 | 2.9    | -2.1   |
|   |   |   | ITIH5         | inter-alpha-trypsin inhibitor heavy chain family, member 5                    | ns                 | 2.9    | -2.5   |
|   |   |   | LOC101927853  | uncharacterized LOC101927853                                                  | ns                 | 2.9    | -2.8   |
|   |   |   | TENT5A        | terminal nucleotidyltransferase 5A                                            | ns                 | 2.9    | -2.4   |
|   |   |   | MFSD4B        | major facilitator superfamily domain containing 4B                            | ns                 | 2.9    | -2.5   |
|   |   |   | LOC105377770  | uncharacterized LOC105377770                                                  | ns                 | 2.9    | -2.8   |
|   |   |   | LOC101926943  | uncharacterized LOC101926943                                                  | ns                 | 2.4    | -2.9   |
|   |   |   | GRHL2         | grainyhead-like transcription factor 2                                        | ns                 | 2.8    | -2.7   |
|   |   |   | NUSAP1        | nucleolar and spindle associated protein 1                                    | ns                 | 2.7    | -2.8   |
|   |   |   | CENPF         | centromere protein F                                                          | ns                 | 2.8    | -2.8   |
|   |   |   | NECTIN4       | nectin cell adhesion molecule 4                                               | ns                 | 2.0    | -2.8   |
|   |   |   | DOCK9         | dedicator of cytokinesis 9                                                    | ns                 | 2.8    | -2.6   |
|   |   |   | TMC1          | transmembrane channel like 1                                                  | ns                 | 2.5    | -2.8   |
|   |   |   | PRC1          | protein regulator of cytokinesis 1                                            | ns                 | 2.7    | -2.4   |
|   |   |   | SKA3          | spindle and kinetochore associated complex subunit 3                          | ns                 | 2.0    | -2.7   |
|   |   |   | TFAP2A        | transcription factor AP-2 alpha (activating enhancer binding protein 2 alpha) | ns                 | 2.4    | -2.7   |
|   |   |   | LOC105379715  | uncharacterized LOC105379715                                                  | ns                 | 2.6    | -2.7   |
|   |   |   | KIF2A         | kinesin heavy chain member 2A                                                 | ns                 | 2.7    | -2.0   |
|   |   |   | GTF2I         | general transcription factor Iii                                              | ns                 | 2.7    | -2.6   |
|   |   |   | MCM5          | minichromosome maintenance complex component 5                                | ns                 | 2.3    | -2.6   |
|   |   |   | CENPI         | centromere protein I                                                          | ns                 | 2.6    | -2.6   |
|   |   |   | FMR1          | fragile X mental retardation 1                                                | ns                 | 2.1    | -2.6   |
|   |   |   | EZH2          | enhancer of zeste 2 polycomb repressive complex 2 subunit                     | ns                 | 2.6    | -2.6   |
|   |   |   | EZR           | ezrin                                                                         | ns                 | 2.5    | -2.6   |
|   |   |   | GPSM2         | G-protein signaling modulator 2                                               | ns                 | 2.3    | -2.6   |
|   |   |   | AHSA2P        | activator of HSP90 ATPase homolog 2, pseudogene                               | ns                 | 2.6    | -2.1   |
|   |   |   | LIMK2         | LIM domain kinase 2                                                           | ns                 | 2.6    | -2.1   |
|   |   |   | LOC105370921  | uncharacterized LOC105370921                                                  | ns                 | 2.5    | -2.6   |
|   |   |   | IMMP2L        | inner mitochondrial membrane peptidase subunit 2                              | ns                 | 2.6    | -2.4   |
|   |   |   | GLCCI1        | glucocorticoid induced 1                                                      | ns                 | 2.6    | -2.1   |
|   |   |   | UBE2C         | ubiquitin-conjugating enzyme E2C                                              | ns                 | 2.5    | -2.5   |
|   |   |   | RTTN          | rotatin                                                                       | ns                 | 2.5    | -2.1   |
|   |   |   | MCTS2P        | malignant T-cell amplified sequence 2, pseudogene                             | ns                 | 2.1    | -2.5   |
|   |   |   | ATF3          | activating transcription factor 3                                             | ns                 | 2.5    | -2.2   |
|   |   |   | MAST4         | microtubule associated serine                                                 | ns                 | 2.5    | -2.2   |
|   |   |   | DNMT1         | DNA (cytosine-5-)-methyltransferase 1                                         | ns                 | 2.5    | -2.2   |
|   |   |   | MBTD1         | mbt domain containing 1                                                       | ns                 | 2.5    | -2.3   |
|   |   |   | SGO1-AS1      | SGO1 antisense RNA 1                                                          | ns                 | 2.0    | -2.4   |
|   |   |   | POLA1         | polymerase (DNA directed), alpha 1, catalytic subunit                         | ns                 | 2.4    | -2.1   |
|   |   |   | DCP2          | decapping mRNA 2                                                              | ns                 | 2.4    | -2.4   |
|   |   |   | DKFZP586I1420 | uncharacterized protein DKFZp586I1420                                         | ns                 | 2.2    | -2.4   |
|   |   |   | ANGPTL4       | angiopoietin like 4                                                           | ns                 | 2.2    | -2.3   |
|   |   |   | LGALS8        | lectin, galactoside-binding, soluble, 8                                       | ns                 | 2.3    | -2.2   |
|   |   |   | PPP1R15B      | protein phosphatase 1, regulatory subunit 15B                                 | ns                 | 2.1    | -2.3   |
|   |   |   | SCARNA9       | small Cajal body-specific RNA 9                                               | ns                 | 2.2    | -2.2   |
|   |   |   | ERVMER34-1    | endogenous retrovirus group MER34, member 1                                   | ns                 | 2.0    | -2.2   |
|   |   |   | DACT2         | dishevelled-binding antagonist of beta-catenin 2                              | ns                 | 2.0    | -2.2   |
|   |   |   | CDCA2         | cell division cycle associated 2                                              | ns                 | 2.2    | -2.0   |
|   |   |   | SLC29A2       | solute carrier family 29 (equilibrative nucleoside transporter), member 2     | ns                 | 2.0    | -2.2   |
|   |   |   | ADK           | adenosine kinase                                                              | ns                 | 2.0    | -2.2   |
|   |   |   | TBC1D3E       | TBC1 domain family, member 3E                                                 | ns                 | 2.0    | -2.2   |
|   |   |   | CYRIA         | CYFIP related Rac1 interactor A                                               | ns                 | 2.1    | -2.1   |
|   |   |   | TMEM30B       | transmembrane protein 30B                                                     | ns                 | 2.0    | -2.1   |
|   |   |   | FAM117B       | family with sequence similarity 117, member B                                 | ns                 | 2.0    | -2.1   |

| S | C | E | Symbol     | Name                                                                                                | Linear Fold Change |        |        |
|---|---|---|------------|-----------------------------------------------------------------------------------------------------|--------------------|--------|--------|
|   |   |   |            |                                                                                                     | S vs C             | S vs E | E vs C |
|   |   |   | ZNF808     | zinc finger protein 808                                                                             | ns                 | 2.1    | -2.1   |
|   |   |   | SPC25      | SPC25, NDC80 kinetochore complex component                                                          | ns                 | 2.0    | -2.1   |
|   |   |   | KIF23      | kinesin family member 23                                                                            | ns                 | 2.0    | -2.0   |
|   |   |   | MMP12      | matrix metalloproteinase 12                                                                         | -75.0              | -173.6 | ns     |
|   |   |   | IGFBP1     | insulin like growth factor binding protein 1                                                        | -53.3              | -151.0 | ns     |
|   |   |   | EPYC       | epiphycan                                                                                           | -11.1              | -74.0  | ns     |
|   |   |   | PRG2       | proteoglycan 2, bone marrow (natural killer cell activator, eosinophil granule major basic protein) | -66.5              | -73.7  | ns     |
|   |   |   | MT1H       | metallothionein 1H                                                                                  | -67.7              | -30.5  | ns     |
|   |   |   | LAIR2      | leukocyte-associated immunoglobulin-like receptor 2                                                 | -45.2              | -31.5  | ns     |
|   |   |   | NOTUM      | notum pectinacetyltransferase homolog (Drosophila)                                                  | -44.8              | -31.3  | ns     |
|   |   |   | MT1G       | metallothionein 1G                                                                                  | -26.2              | -32.8  | ns     |
|   |   |   | HNRNPA1P33 | heterogeneous nuclear ribonucleoprotein A1 pseudogene 33                                            | -32.1              | -10.2  | ns     |
|   |   |   | HTRA4      | HtrA serine peptidase 4                                                                             | -30.0              | -28.7  | ns     |
|   |   |   | HCAR2      | hydroxycarboxylic acid receptor 2                                                                   | -29.7              | -12.5  | ns     |
|   |   |   | AOC1       | amine oxidase, copper containing 1                                                                  | -16.6              | -22.5  | ns     |
|   |   |   | LINC01602  | long intergenic non-protein coding RNA 1602                                                         | -9.7               | -22.4  | ns     |
|   |   |   | MT1X       | metallothionein 1X                                                                                  | -18.9              | -21.9  | ns     |
|   |   |   | MAMDC2     | MAM domain containing 2                                                                             | -9.4               | -21.0  | ns     |
|   |   |   | DIO2       | deiodinase, iodothyronine, type II                                                                  | -20.9              | -6.7   | ns     |
|   |   |   | PDCD1LG2   | programmed cell death 1 ligand 2                                                                    | -16.0              | -20.7  | ns     |
|   |   |   | IL1R2      | interleukin 1 receptor, type II                                                                     | -14.1              | -17.6  | ns     |
|   |   |   | MT1F       | metallothionein 1F                                                                                  | -17.2              | -14.0  | ns     |
|   |   |   | RASGRF2    | Ras protein-specific guanine nucleotide-releasing factor 2                                          | -17.1              | -8.7   | ns     |
|   |   |   | PLA2G10    | phospholipase A2, group X                                                                           | -16.4              | -15.2  | ns     |
|   |   |   | ISG15      | ISG15 ubiquitin-like modifier                                                                       | -11.9              | -14.0  | ns     |
|   |   |   | TNFSF10    | tumor necrosis factor (ligand) superfamily, member 10                                               | -12.8              | -7.7   | ns     |
|   |   |   | HAPLN3     | hyaluronan and proteoglycan link protein 3                                                          | -12.6              | -4.3   | ns     |
|   |   |   | PLAC8      | placenta specific 8                                                                                 | -12.5              | -7.1   | ns     |
|   |   |   | HSPG2      | heparan sulfate proteoglycan 2                                                                      | -12.3              | -11.0  | ns     |
|   |   |   | DEPDC7     | DEP domain containing 7                                                                             | -12.3              | -7.1   | ns     |
|   |   |   | GLIPR1     | GLI pathogenesis-related 1                                                                          | -11.7              | -9.4   | ns     |
|   |   |   | SLC16A6    | solute carrier family 16, member 6                                                                  | -11.4              | -5.7   | ns     |
|   |   |   | RFPL4B     | ret finger protein-like 4B                                                                          | -8.5               | -11.2  | ns     |
|   |   |   | DAPP1      | dual adaptor of phosphotyrosine and 3-phosphoinositides                                             | -8.7               | -11.0  | ns     |
|   |   |   | MMP2       | matrix metalloproteinase 2                                                                          | -7.7               | -10.8  | ns     |
|   |   |   | PLA2G7     | phospholipase A2, group VII (platelet-activating factor acetylhydrolase, plasma)                    | -5.2               | -10.4  | ns     |
|   |   |   | GPR32      | G protein-coupled receptor 32                                                                       | -10.1              | -7.8   | ns     |
|   |   |   | FAT2       | FAT atypical cadherin 2                                                                             | -9.8               | -8.1   | ns     |
|   |   |   | NOG        | noggin                                                                                              | -9.7               | -6.9   | ns     |
|   |   |   | CST6       | cystatin E                                                                                          | -9.6               | -4.4   | ns     |
|   |   |   | SLC4A7     | solute carrier family 4, sodium bicarbonate cotransporter, member 7                                 | -9.4               | -6.9   | ns     |
|   |   |   | TCF7L2     | transcription factor 7-like 2 (T-cell specific, HMG-box)                                            | -9.3               | -6.0   | ns     |
|   |   |   | SDC4       | syndecan 4                                                                                          | -9.2               | -3.9   | ns     |
|   |   |   | PTGES      | prostaglandin E synthase                                                                            | -9.1               | -4.8   | ns     |
|   |   |   | CCR1       | chemokine (C-C motif) receptor 1                                                                    | -8.8               | -6.2   | ns     |
|   |   |   | MYCNUT     | MYCN upstream transcript (non-protein coding)                                                       | -8.7               | -5.2   | ns     |
|   |   |   | JPT1       | Jupiter microtubule associated homolog 1                                                            | -8.6               | -7.4   | ns     |
|   |   |   | QSOX1      | quiescin Q6 sulfhydryl oxidase 1                                                                    | -8.5               | -7.6   | ns     |
|   |   |   | REPS2      | RALBP1 associated Eps domain containing 2                                                           | -8.5               | -6.3   | ns     |
|   |   |   | SERPING1   | serpin peptidase inhibitor, clade G (C1 inhibitor), member 1                                        | -4.9               | -8.3   | ns     |
|   |   |   | FLNB       | filamin B, beta                                                                                     | -8.3               | -4.5   | ns     |
|   |   |   | UPK1B      | uroplakin 1B                                                                                        | -8.3               | -5.2   | ns     |
|   |   |   | IL2RB      | interleukin 2 receptor, beta                                                                        | -7.3               | -8.2   | ns     |
|   |   |   | GREB1L     | growth regulation by estrogen in breast cancer-like                                                 | -7.7               | -4.0   | ns     |
|   |   |   | ADAM19     | ADAM metalloproteinase domain 19                                                                    | -7.6               | -6.2   | ns     |

| S | C | E | Symbol     | Name                                                                      | Linear Fold Change |        |        |
|---|---|---|------------|---------------------------------------------------------------------------|--------------------|--------|--------|
|   |   |   |            |                                                                           | S vs C             | S vs E | E vs C |
|   |   |   | PLAUR      | plasminogen activator, urokinase receptor                                 | -3.4               | -7.5   | ns     |
|   |   |   | CRISPLD2   | cysteine-rich secretory protein LCCL domain containing 2                  | -3.3               | -7.5   | ns     |
|   |   |   | SAMD9      | sterile alpha motif domain containing 9                                   | -5.2               | -7.4   | ns     |
|   |   |   | SPRR2G     | small proline-rich protein 2G                                             | -6.6               | -7.3   | ns     |
|   |   |   | GALNT3     | polypeptide N-acetylgalactosaminyltransferase 3                           | -7.3               | -6.1   | ns     |
|   |   |   | IL10RA     | interleukin 10 receptor, alpha                                            | -7.2               | -3.6   | ns     |
|   |   |   | SNAI1      | snail family zinc finger 1                                                | -7.1               | -4.9   | ns     |
|   |   |   | CCNE1      | cyclin E1                                                                 | -7.0               | -3.4   | ns     |
|   |   |   | IFI27      | interferon, alpha-inducible protein 27                                    | -3.5               | -7.0   | ns     |
|   |   |   | CITED2     | Cbp                                                                       | -5.3               | -7.0   | ns     |
|   |   |   | FN1        | fibronectin 1                                                             | -6.9               | -5.5   | ns     |
|   |   |   | TGFB2      | transforming growth factor beta 2                                         | -6.8               | -6.3   | ns     |
|   |   |   | C12orf75   | chromosome 12 open reading frame 75                                       | -6.8               | -5.4   | ns     |
|   |   |   | HUNK       | hormonally up-regulated Neu-associated kinase                             | -4.0               | -6.8   | ns     |
|   |   |   | CLNK       | cytokine-dependent hematopoietic cell linker                              | -6.7               | -4.7   | ns     |
|   |   |   | IFIT1      | interferon-induced protein with tetratricopeptide repeats 1               | -5.5               | -6.7   | ns     |
|   |   |   | TAP1       | transporter 1, ATP-binding cassette, sub-family B (MDR                    | -5.9               | -6.6   | ns     |
|   |   |   | GALNT7     | polypeptide N-acetylgalactosaminyltransferase 7                           | -6.6               | -5.7   | ns     |
|   |   |   | RAB6C-AS1  | RAB6C antisense RNA 1                                                     | -6.6               | -3.7   | ns     |
|   |   |   | HTRA1      | HtrA serine peptidase 1                                                   | -6.5               | -4.4   | ns     |
|   |   |   | TPM1       | tropomyosin 1 (alpha)                                                     | -6.5               | -3.7   | ns     |
|   |   |   | HLA-G      | major histocompatibility complex, class I, G                              | -5.3               | -6.5   | ns     |
|   |   |   | MXRA8      | matrix-remodelling associated 8                                           | -4.7               | -6.4   | ns     |
|   |   |   | MIR181A2HG | MIR181A2 host gene                                                        | -6.4               | -2.7   | ns     |
|   |   |   | GPRC5A     | G protein-coupled receptor, class C, group 5, member A                    | -6.4               | -6.2   | ns     |
|   |   |   | TIMP3      | TIMP metalloproteinase inhibitor 3                                        | -4.4               | -6.2   | ns     |
|   |   |   | MX1        | MX dynamin-like GTPase 1                                                  | -5.1               | -6.2   | ns     |
|   |   |   | CHRM5      | cholinergic receptor, muscarinic 5                                        | -6.2               | -3.6   | ns     |
|   |   |   | UBE2L6     | ubiquitin-conjugating enzyme E2L 6                                        | -2.8               | -5.9   | ns     |
|   |   |   | KDEL3      | KDEL (Lys-Asp-Glu-Leu) endoplasmic reticulum protein retention receptor 3 | -5.4               | -5.8   | ns     |
|   |   |   | ISM2       | isthmin 2                                                                 | -5.8               | -4.9   | ns     |
|   |   |   | LGALS3BP   | lectin, galactoside-binding, soluble, 3 binding protein                   | -5.7               | -4.3   | ns     |
|   |   |   | EPSTI1     | epithelial stromal interaction 1 (breast)                                 | -5.7               | -4.8   | ns     |
|   |   |   | LAMA4      | laminin, alpha 4                                                          | -3.7               | -5.7   | ns     |
|   |   |   | IFITM1     | interferon induced transmembrane protein 1                                | -2.8               | -5.6   | ns     |
|   |   |   | LVRN       | laeverin                                                                  | -5.5               | -4.5   | ns     |
|   |   |   | UBL3       | ubiquitin-like 3                                                          | -5.4               | -3.3   | ns     |
|   |   |   | PTPRF      | protein tyrosine phosphatase, receptor type, F                            | -5.4               | -3.7   | ns     |
|   |   |   | ARHGDI3    | Rho GDP dissociation inhibitor (GDI) beta                                 | -5.3               | -4.8   | ns     |
|   |   |   | HCG4       | HLA complex group 4 (non-protein coding)                                  | -4.5               | -5.2   | ns     |
|   |   |   | SH3PXD2B   | SH3 and PX domains 2B                                                     | -5.2               | -4.1   | ns     |
|   |   |   | SOX4       | SRY box 4                                                                 | -5.2               | -3.3   | ns     |
|   |   |   | ART4       | ADP-ribosyltransferase 4 (Dombrock blood group)                           | -5.2               | -3.5   | ns     |
|   |   |   | UGDH       | UDP-glucose 6-dehydrogenase                                               | -3.6               | -5.2   | ns     |
|   |   |   | PIPOX      | pipecolic acid oxidase                                                    | -3.3               | -5.1   | ns     |
|   |   |   | SOAT1      | sterol O-acyltransferase 1                                                | -3.9               | -5.1   | ns     |
|   |   |   | GALNT6     | polypeptide N-acetylgalactosaminyltransferase 6                           | -5.0               | -3.7   | ns     |
|   |   |   | COL12A1    | collagen, type XII, alpha 1                                               | -4.2               | -5.0   | ns     |
|   |   |   | NPC2       | Niemann-Pick disease, type C2                                             | -2.8               | -5.0   | ns     |
|   |   |   | SCUBE1     | signal peptide, CUB domain, EGF-like 1                                    | -5.0               | -3.2   | ns     |
|   |   |   | NRIP1      | nuclear receptor interacting protein 1                                    | -4.9               | -2.8   | ns     |
|   |   |   | GPR78      | G protein-coupled receptor 78                                             | -4.9               | -3.1   | ns     |
|   |   |   | IFIH1      | interferon induced, with helicase C domain 1                              | -4.9               | -3.9   | ns     |
|   |   |   | TIMP1      | TIMP metalloproteinase inhibitor 1                                        | -2.9               | -4.9   | ns     |
|   |   |   | RAB8B      | RAB8B, member RAS oncogene family                                         | -4.8               | -3.7   | ns     |

| S | C | E | Symbol       | Name                                                                                                          | Linear Fold Change |        |        |
|---|---|---|--------------|---------------------------------------------------------------------------------------------------------------|--------------------|--------|--------|
|   |   |   |              |                                                                                                               | S vs C             | S vs E | E vs C |
|   |   |   | CD276        | CD276 molecule                                                                                                | -4.7               | -3.4   | ns     |
|   |   |   | GRK3         | G protein-coupled receptor kinase 3                                                                           | -4.7               | -3.8   | ns     |
|   |   |   | PARP9        | poly(ADP-ribose) polymerase family member 9                                                                   | -3.5               | -4.6   | ns     |
|   |   |   | LRRC32       | leucine rich repeat containing 32                                                                             | -4.6               | -2.5   | ns     |
|   |   |   | MGAT4A       | mannosyl (alpha-1,3-)-glycoprotein beta-1,4-N-acetylglucosaminyltransferase, isozyme A                        | -4.6               | -4.5   | ns     |
|   |   |   | LTBP1        | latent transforming growth factor beta binding protein 1                                                      | -2.9               | -4.6   | ns     |
|   |   |   | P4HA1        | prolyl 4-hydroxylase, alpha polypeptide I                                                                     | -4.5               | -2.5   | ns     |
|   |   |   | LOC105379311 | uncharacterized LOC105379311                                                                                  | -4.5               | -3.0   | ns     |
|   |   |   | GBP2         | guanylate binding protein 2, interferon-inducible                                                             | -4.0               | -4.5   | ns     |
|   |   |   | GAL          | galanin                                                                                                       | -2.3               | -4.5   | ns     |
|   |   |   | LAYN         | layilin                                                                                                       | -3.0               | -4.5   | ns     |
|   |   |   | CPED1        | cadherin-like and PC-esterase domain containing 1                                                             | -3.2               | -4.4   | ns     |
|   |   |   | LOC105377105 | uncharacterized LOC105377105                                                                                  | -4.4               | -2.5   | ns     |
|   |   |   | HLA-E        | major histocompatibility complex, class I, E                                                                  | -2.6               | -4.4   | ns     |
|   |   |   | ITGA5        | integrin alpha 5                                                                                              | -4.4               | -2.4   | ns     |
|   |   |   | GCNT1        | glucosaminyl (N-acetyl) transferase 1, core 2                                                                 | -2.9               | -4.4   | ns     |
|   |   |   | GDPD3        | glycerophosphodiester phosphodiesterase domain containing 3                                                   | -4.4               | -2.6   | ns     |
|   |   |   | CYP26A1      | cytochrome P450, family 26, subfamily A, polypeptide 1                                                        | -3.3               | -4.4   | ns     |
|   |   |   | FHOD3        | formin homology 2 domain containing 3                                                                         | -4.3               | -4.4   | ns     |
|   |   |   | OAS1         | 2-5-oligoadenylate synthetase 1                                                                               | -4.1               | -4.4   | ns     |
|   |   |   | PXN          | paxillin                                                                                                      | -4.3               | -2.2   | ns     |
|   |   |   | DNAPTP3      | histone demethylase UTY-like                                                                                  | -4.3               | -3.7   | ns     |
|   |   |   | MTSS2        | MTSS I-BAR domain containing 2                                                                                | -4.3               | -2.4   | ns     |
|   |   |   | SLC25A15     | solute carrier family 25 (mitochondrial carrier; ornithine transporter) member 15                             | -4.2               | -3.4   | ns     |
|   |   |   | IGFBP3       | insulin like growth factor binding protein 3                                                                  | -4.2               | -2.1   | ns     |
|   |   |   | ST6GALNAC2   | ST6 (alpha-N-acetyl-neuraminyl-2,3-beta-galactosyl-1,3)-N-acetylgalactosaminide alpha-2,6-sialyltransferase 2 | -3.8               | -4.2   | ns     |
|   |   |   | ACSL5        | acyl-CoA synthetase long-chain family member 5                                                                | -3.0               | -4.2   | ns     |
|   |   |   | KRT19        | keratin 19, type I                                                                                            | -4.2               | -2.4   | ns     |
|   |   |   | HLA-C        | major histocompatibility complex, class I, C                                                                  | -2.6               | -4.2   | ns     |
|   |   |   | ASAP3        | ArfGAP with SH3 domain, ankyrin repeat and PH domain 3                                                        | -4.2               | -3.2   | ns     |
|   |   |   | TSPO         | translocator protein (18kDa)                                                                                  | -2.9               | -4.2   | ns     |
|   |   |   | PEA15        | phosphoprotein enriched in astrocytes 15                                                                      | -2.2               | -4.1   | ns     |
|   |   |   | LPCAT1       | lysophosphatidylcholine acyltransferase 1                                                                     | -4.1               | -2.1   | ns     |
|   |   |   | FBXO32       | F-box protein 32                                                                                              | -3.1               | -4.1   | ns     |
|   |   |   | PCSK6        | proprotein convertase subtilisin                                                                              | -4.1               | -2.4   | ns     |
|   |   |   | ADAMTS1      | ADAM metalloproteinase with thrombospondin type 1 motif 1                                                     | -4.1               | -3.7   | ns     |
|   |   |   | LINC01296    | long intergenic non-protein coding RNA 1296                                                                   | -4.1               | -2.9   | ns     |
|   |   |   | HPGD         | hydroxyprostaglandin dehydrogenase 15-(NAD)                                                                   | -4.0               | -3.0   | ns     |
|   |   |   | SEMA3C       | semaphorin 3C                                                                                                 | -3.0               | -4.0   | ns     |
|   |   |   | PTGER3       | prostaglandin E receptor 3 (subtype EP3)                                                                      | -3.6               | -4.0   | ns     |
|   |   |   | AFAP1        | actin filament associated protein 1                                                                           | -4.0               | -2.4   | ns     |
|   |   |   | IL1R1        | interleukin 1 receptor, type I                                                                                | -2.5               | -3.9   | ns     |
|   |   |   | PLOD2        | procollagen-lysine, 2-oxoglutarate 5-dioxygenase 2                                                            | -3.9               | -2.4   | ns     |
|   |   |   | STAT1        | signal transducer and activator of transcription 1                                                            | -2.9               | -3.8   | ns     |
|   |   |   | APOL6        | apolipoprotein L, 6                                                                                           | -3.2               | -3.8   | ns     |
|   |   |   | KAT14        | lysine acetyltransferase 14                                                                                   | -3.8               | -2.2   | ns     |
|   |   |   | LY6K         | lymphocyte antigen 6 complex, locus K                                                                         | -3.7               | -2.5   | ns     |
|   |   |   | UGCG         | UDP-glucose ceramide glucosyltransferase                                                                      | -3.1               | -3.7   | ns     |
|   |   |   | DHRS7        | dehydrogenase                                                                                                 | -2.8               | -3.7   | ns     |
|   |   |   | CNN2         | calponin 2                                                                                                    | -3.3               | -3.7   | ns     |
|   |   |   | HCAR1        | hydroxycarboxylic acid receptor 1                                                                             | -3.7               | -2.4   | ns     |
|   |   |   | CSGALNACT2   | chondroitin sulfate N-acetylgalactosaminyltransferase 2                                                       | -2.5               | -3.7   | ns     |
|   |   |   | PARP4        | poly(ADP-ribose) polymerase family member 4                                                                   | -2.8               | -3.6   | ns     |
|   |   |   | PLSCR1       | phospholipid scramblase 1                                                                                     | -3.6               | -2.7   | ns     |
|   |   |   | MYADM        | myeloid-associated differentiation marker                                                                     | -3.6               | -2.4   | ns     |



| S | C | E | Symbol    | Name                                                                                          | Linear Fold Change |        |        |
|---|---|---|-----------|-----------------------------------------------------------------------------------------------|--------------------|--------|--------|
|   |   |   |           |                                                                                               | S vs C             | S vs E | E vs C |
|   |   |   | PTPRS     | protein tyrosine phosphatase, receptor type, S                                                | -3.0               | -3.5   | ns     |
|   |   |   | EXTL3     | exostosin-like glycosyltransferase 3                                                          | -3.5               | -2.2   | ns     |
|   |   |   | MACIR     | macrophage immunometabolism regulator                                                         | -3.5               | -2.8   | ns     |
|   |   |   | LIMA1     | LIM domain and actin binding 1                                                                | -3.5               | -3.1   | ns     |
|   |   |   | ETS2      | v-ets avian erythroblastosis virus E26 oncogene homolog 2                                     | -2.9               | -3.5   | ns     |
|   |   |   | PDIA5     | protein disulfide isomerase family A, member 5                                                | -3.5               | -2.6   | ns     |
|   |   |   | FHL2      | four and a half LIM domains 2                                                                 | -3.5               | -2.4   | ns     |
|   |   |   | HLA-F-AS1 | HLA-F antisense RNA 1                                                                         | -2.8               | -3.5   | ns     |
|   |   |   | MEX3D     | mex-3 RNA binding family member D                                                             | -3.5               | -2.9   | ns     |
|   |   |   | SLC2A10   | solute carrier family 2 (facilitated glucose transporter), member 10                          | -3.5               | -3.1   | ns     |
|   |   |   | GCH1      | GTP cyclohydrolase 1                                                                          | -3.4               | -3.4   | ns     |
|   |   |   | COTL1     | coactosin-like F-actin binding protein 1                                                      | -3.4               | -2.9   | ns     |
|   |   |   | CRACDL    | CRACD like                                                                                    | -3.4               | -2.1   | ns     |
|   |   |   | SLC15A3   | solute carrier family 15 (oligopeptide transporter), member 3                                 | -3.4               | -2.6   | ns     |
|   |   |   | PSMB8     | proteasome subunit beta 8                                                                     | -2.1               | -3.4   | ns     |
|   |   |   | TNFAIP2   | tumor necrosis factor, alpha-induced protein 2                                                | -3.4               | -3.1   | ns     |
|   |   |   | CMTM3     | CKLF-like MARVEL transmembrane domain containing 3                                            | -3.3               | -2.8   | ns     |
|   |   |   | RRAD      | Ras-related associated with diabetes                                                          | -3.3               | -2.9   | ns     |
|   |   |   | PLK2      | polo-like kinase 2                                                                            | -3.3               | -2.7   | ns     |
|   |   |   | MEGF9     | multiple EGF-like-domains 9                                                                   | -2.6               | -3.3   | ns     |
|   |   |   | SSR3      | signal sequence receptor, gamma (translocon-associated protein gamma)                         | -2.5               | -3.2   | ns     |
|   |   |   | ECE1      | endothelin converting enzyme 1                                                                | -2.9               | -3.2   | ns     |
|   |   |   | TUBB2A    | tubulin, beta 2A class IIa                                                                    | -3.2               | -3.2   | ns     |
|   |   |   | SH3D19    | SH3 domain containing 19                                                                      | -3.2               | -2.8   | ns     |
|   |   |   | ASCL2     | achaete-scute family bHLH transcription factor 2                                              | -3.2               | -2.7   | ns     |
|   |   |   | LACTB     | lactamase, beta                                                                               | -2.7               | -3.2   | ns     |
|   |   |   | CLN5      | ceroid-lipofuscinosis, neuronal 5                                                             | -3.2               | -2.8   | ns     |
|   |   |   | PLOD1     | procollagen-lysine, 2-oxoglutarate 5-dioxygenase 1                                            | -3.2               | -2.8   | ns     |
|   |   |   | WIPF1     | WAS                                                                                           | -2.2               | -3.2   | ns     |
|   |   |   | ERP27     | endoplasmic reticulum protein 27                                                              | -3.2               | -2.7   | ns     |
|   |   |   | IL13RA1   | interleukin 13 receptor, alpha 1                                                              | -2.4               | -3.2   | ns     |
|   |   |   | RPS27L    | ribosomal protein S27-like                                                                    | -3.2               | -2.2   | ns     |
|   |   |   | SERPINE2  | serpin peptidase inhibitor, clade E (nexin, plasminogen activator inhibitor type 1), member 2 | -3.1               | -3.0   | ns     |
|   |   |   | KCNK12    | potassium channel, two pore domain subfamily K, member 12                                     | -3.0               | -3.1   | ns     |
|   |   |   | KLF6      | Kruppel-like factor 6                                                                         | -3.0               | -3.1   | ns     |
|   |   |   | HEG1      | heart development protein with EGF-like domains 1                                             | -3.1               | -2.8   | ns     |
|   |   |   | FAM110A   | family with sequence similarity 110, member A                                                 | -3.0               | -2.6   | ns     |
|   |   |   | PLOD3     | procollagen-lysine, 2-oxoglutarate 5-dioxygenase 3                                            | -3.0               | -3.0   | ns     |
|   |   |   | MICAL2    | microtubule associated monooxygenase, calponin and LIM domain containing 2                    | -2.6               | -3.0   | ns     |
|   |   |   | SESTD1    | SEC14 and spectrin domains 1                                                                  | -3.0               | -2.2   | ns     |
|   |   |   | PARP12    | poly(ADP-ribose) polymerase family member 12                                                  | -2.8               | -3.0   | ns     |
|   |   |   | CCN1      | cellular communication network factor 1                                                       | -3.0               | -3.0   | ns     |
|   |   |   | OCIAD2    | OCIA domain containing 2                                                                      | -3.0               | -2.9   | ns     |
|   |   |   | RHOU      | ras homolog family member U                                                                   | -3.0               | -2.8   | ns     |
|   |   |   | PIGT      | phosphatidylinositol glycan anchor biosynthesis class T                                       | -2.5               | -3.0   | ns     |
|   |   |   | MMP14     | matrix metalloproteinase 14 (membrane-inserted)                                               | -3.0               | -2.9   | ns     |
|   |   |   | CD9       | CD9 molecule                                                                                  | -3.0               | -2.5   | ns     |
|   |   |   | SYNE1     | spectrin repeat containing, nuclear envelope 1                                                | -2.6               | -3.0   | ns     |
|   |   |   | EIF4EBP1  | eukaryotic translation initiation factor 4E binding protein 1                                 | -3.0               | -2.4   | ns     |
|   |   |   | PGRMC1    | progesterone receptor membrane component 1                                                    | -2.9               | -2.7   | ns     |
|   |   |   | JAK1      | Janus kinase 1                                                                                | -2.9               | -2.3   | ns     |
|   |   |   | GALM      | galactose mutarotase (aldose 1-epimerase)                                                     | -2.9               | -2.7   | ns     |
|   |   |   | STXBP5    | syntaxin binding protein 5 (tomosyn)                                                          | -2.9               | -2.1   | ns     |
|   |   |   | TRIM14    | tripartite motif containing 14                                                                | -2.9               | -2.4   | ns     |
|   |   |   | HACD4     | 3-hydroxyacyl-CoA dehydratase 4                                                               | -2.7               | -2.9   | ns     |



| S | C | E | Symbol       | Name                                                                             | Linear Fold Change |        |        |
|---|---|---|--------------|----------------------------------------------------------------------------------|--------------------|--------|--------|
|   |   |   |              |                                                                                  | S vs C             | S vs E | E vs C |
|   |   |   | LINC00324    | long intergenic non-protein coding RNA 324                                       | -2.3               | -2.9   | ns     |
|   |   |   | CEACAM1      | carcinoembryonic antigen-related cell adhesion molecule 1 (biliary glycoprotein) | -2.8               | -2.4   | ns     |
|   |   |   | EHBP1        | EH domain binding protein 1                                                      | -2.8               | -2.8   | ns     |
|   |   |   | TUBB6        | tubulin, beta 6 class V                                                          | -2.8               | -2.2   | ns     |
|   |   |   | C5orf46      | chromosome 5 open reading frame 46                                               | -2.8               | -2.3   | ns     |
|   |   |   | PRDX4        | peroxiredoxin 4                                                                  | -2.8               | -2.8   | ns     |
|   |   |   | RABAC1       | Rab acceptor 1 (prenylated)                                                      | -2.8               | -2.7   | ns     |
|   |   |   | EFNB1        | ephrin-B1                                                                        | -2.8               | -2.2   | ns     |
|   |   |   | TES          | testin LIM domain protein                                                        | -2.7               | -2.8   | ns     |
|   |   |   | CDC42SE2     | CDC42 small effector 2                                                           | -2.8               | -2.2   | ns     |
|   |   |   | ZC3HAV1      | zinc finger CCCH-type, antiviral 1                                               | -2.3               | -2.8   | ns     |
|   |   |   | GPR180       | G protein-coupled receptor 180                                                   | -2.7               | -2.6   | ns     |
|   |   |   | AIF1L        | allograft inflammatory factor 1-like                                             | -2.7               | -2.7   | ns     |
|   |   |   | VASP         | vasodilator-stimulated phosphoprotein                                            | -2.7               | -2.4   | ns     |
|   |   |   | RPL39L       | ribosomal protein L39-like                                                       | -2.5               | -2.7   | ns     |
|   |   |   | DTX3L        | deltex 3 like, E3 ubiquitin ligase                                               | -2.3               | -2.7   | ns     |
|   |   |   | DENND1B      | DENN                                                                             | -2.7               | -2.0   | ns     |
|   |   |   | ADA          | adenosine deaminase                                                              | -2.6               | -2.6   | ns     |
|   |   |   | SP110        | SP110 nuclear body protein                                                       | -2.6               | -2.6   | ns     |
|   |   |   | PLAAT4       | phospholipase A and acyltransferase 4                                            | -2.5               | -2.6   | ns     |
|   |   |   | ATP11A       | ATPase, class VI, type 11A                                                       | -2.6               | -2.6   | ns     |
|   |   |   | P3H1         | prolyl 3-hydroxylase 1                                                           | -2.6               | -2.3   | ns     |
|   |   |   | KCTD12       | potassium channel tetramerization domain containing 12                           | -2.2               | -2.6   | ns     |
|   |   |   | NCOA1        | nuclear receptor coactivator 1                                                   | -2.6               | -2.6   | ns     |
|   |   |   | SLC50A1      | solute carrier family 50 (sugar efflux transporter), member 1                    | -2.6               | -2.1   | ns     |
|   |   |   | LPCAT4       | lysophosphatidylcholine acyltransferase 4                                        | -2.5               | -2.2   | ns     |
|   |   |   | TMEM14A      | transmembrane protein 14A                                                        | -2.5               | -2.5   | ns     |
|   |   |   | GTPBP1       | GTP binding protein 1                                                            | -2.4               | -2.5   | ns     |
|   |   |   | GPX8         | glutathione peroxidase 8 (putative)                                              | -2.5               | -2.2   | ns     |
|   |   |   | FYB1         | FYN binding protein 1                                                            | -2.5               | -2.1   | ns     |
|   |   |   | HSPA2        | heat shock 70kDa protein 2                                                       | -2.5               | -2.4   | ns     |
|   |   |   | ASPSCR1      | alveolar soft part sarcoma chromosome region, candidate 1                        | -2.1               | -2.5   | ns     |
|   |   |   | RARS2        | arginyl-tRNA synthetase 2, mitochondrial                                         | -2.2               | -2.5   | ns     |
|   |   |   | GYS1         | glycogen synthase 1 (muscle)                                                     | -2.0               | -2.4   | ns     |
|   |   |   | FADS3        | fatty acid desaturase 3                                                          | -2.3               | -2.4   | ns     |
|   |   |   | CAPN2        | calpain 2, (m                                                                    | -2.0               | -2.4   | ns     |
|   |   |   | CPM          | carboxypeptidase M                                                               | -2.4               | -2.4   | ns     |
|   |   |   | DDX58        | DEAD (Asp-Glu-Ala-Asp) box polypeptide 58                                        | -2.4               | -2.2   | ns     |
|   |   |   | IFNGR2       | interferon gamma receptor 2 (interferon gamma transducer 1)                      | -2.3               | -2.4   | ns     |
|   |   |   | PLS3         | plastin 3                                                                        | -2.3               | -2.2   | ns     |
|   |   |   | IFNAR2       | interferon (alpha, beta and omega) receptor 2                                    | -2.3               | -2.1   | ns     |
|   |   |   | FSTL1        | folliculin like 1                                                                | -2.3               | -2.3   | ns     |
|   |   |   | IFNAR1       | interferon (alpha, beta and omega) receptor 1                                    | -2.3               | -2.0   | ns     |
|   |   |   | PSMB10       | proteasome subunit beta 10                                                       | -2.2               | -2.3   | ns     |
|   |   |   | APH1B        | APH1B gamma secretase subunit                                                    | -2.3               | -2.1   | ns     |
|   |   |   | CAPG         | capping protein (actin filament), gelsolin-like                                  | -2.3               | -2.2   | ns     |
|   |   |   | ADAM9        | ADAM metalloproteinase domain 9                                                  | -2.3               | -2.0   | ns     |
|   |   |   | ADAM15       | ADAM metalloproteinase domain 15                                                 | -2.2               | -2.2   | ns     |
|   |   |   | ID1          | inhibitor of DNA binding 1, dominant negative helix-loop-helix protein           | -2.2               | -2.2   | ns     |
|   |   |   | ABRA1        | ABRA C-terminal like                                                             | -2.2               | -2.2   | ns     |
|   |   |   | DPP7         | dipeptidyl-peptidase 7                                                           | -2.2               | -2.1   | ns     |
|   |   |   | LOC100132215 | uncharacterized LOC100132215                                                     | -2.2               | -2.1   | ns     |
|   |   |   | POGLUT2      | protein O-glucosyltransferase 2                                                  | -2.2               | -2.1   | ns     |
|   |   |   | LASP1        | LIM and SH3 protein 1                                                            | -2.2               | -2.2   | ns     |
|   |   |   | SIK1         | salt-inducible kinase 1                                                          | -2.2               | -2.0   | ns     |

| S | C | E | Symbol   | Name                                                                     | Linear Fold Change |        |        |
|---|---|---|----------|--------------------------------------------------------------------------|--------------------|--------|--------|
|   |   |   |          |                                                                          | S vs C             | S vs E | E vs C |
|   |   |   | SP100    | SP100 nuclear antigen                                                    | -2.1               | -2.2   | ns     |
|   |   |   | CHIC2    | cysteine rich hydrophobic domain 2                                       | -2.1               | -2.1   | ns     |
|   |   |   | MGLL     | monoglyceride lipase                                                     | -2.1               | -2.1   | ns     |
|   |   |   | PRCP     | prolylcarboxypeptidase                                                   | -2.0               | -2.0   | ns     |
|   |   |   | ADGRL4   | adhesion G protein-coupled receptor L4                                   | 6.6                | ns     | 22.0   |
|   |   |   | KDR      | kinase insert domain receptor                                            | 13.1               | ns     | 5.8    |
|   |   |   | SNRPN    | small nuclear ribonucleoprotein polypeptide N                            | 4.6                | ns     | 11.4   |
|   |   |   | CD34     | CD34 molecule                                                            | 10.1               | ns     | 5.9    |
|   |   |   | CLEC3B   | C-type lectin domain family 3, member B                                  | 4.1                | ns     | 10.1   |
|   |   |   | TM4SF1   | transmembrane 4 L six family member 1                                    | 4.8                | ns     | 10.0   |
|   |   |   | PREX2    | phosphatidylinositol-3,4,5-trisphosphate-dependent Rac exchange factor 2 | 9.6                | ns     | 4.4    |
|   |   |   | A2M      | alpha-2-macroglobulin                                                    | 4.0                | ns     | 9.0    |
|   |   |   | IL33     | interleukin 33                                                           | 8.6                | ns     | 6.5    |
|   |   |   | MYCT1    | myc target 1                                                             | 8.2                | ns     | 7.0    |
|   |   |   | RAMP2    | receptor (G protein-coupled) activity modifying protein 2                | 7.8                | ns     | 6.4    |
|   |   |   | CACHD1   | cache domain containing 1                                                | 6.3                | ns     | 3.2    |
|   |   |   | CALCRL   | calcitonin receptor like receptor                                        | 2.8                | ns     | 6.1    |
|   |   |   | TRPC6    | transient receptor potential cation channel, subfamily C, member 6       | 6.1                | ns     | 5.9    |
|   |   |   | IL1A     | interleukin 1 alpha                                                      | 3.0                | ns     | 5.8    |
|   |   |   | S1PR1    | sphingosine-1-phosphate receptor 1                                       | 5.8                | ns     | 5.7    |
|   |   |   | ARHGEF6  | Rac                                                                      | 5.8                | ns     | 5.6    |
|   |   |   | PPP1R14A | protein phosphatase 1, regulatory (inhibitor) subunit 14A                | 3.6                | ns     | 5.4    |
|   |   |   | ACTA2    | actin, alpha 2, smooth muscle, aorta                                     | 4.4                | ns     | 5.3    |
|   |   |   | IDO1     | indoleamine 2,3-dioxygenase 1                                            | 4.1                | ns     | 5.2    |
|   |   |   | DYNC2H1  | dynein, cytoplasmic 2, heavy chain 1                                     | 2.7                | ns     | 4.9    |
|   |   |   | GMFG     | glia maturation factor, gamma                                            | 3.3                | ns     | 4.8    |
|   |   |   | MERTK    | MER proto-oncogene, tyrosine kinase                                      | 2.7                | ns     | 4.8    |
|   |   |   | PRKAR2B  | protein kinase, cAMP-dependent, regulatory, type II, beta                | 4.8                | ns     | 2.5    |
|   |   |   | WLS      | wntless Wnt ligand secretion mediator                                    | 4.7                | ns     | 3.4    |
|   |   |   | ZSWIM6   | zinc finger, SWIM-type containing 6                                      | 3.3                | ns     | 4.6    |
|   |   |   | SDC2     | syndecan 2                                                               | 2.3                | ns     | 4.3    |
|   |   |   | IGF1     | insulin-like growth factor 1 (somatomedin C)                             | 3.5                | ns     | 4.3    |
|   |   |   | IRS1     | insulin receptor substrate 1                                             | 2.4                | ns     | 4.3    |
|   |   |   | EBF1     | early B-cell factor 1                                                    | 4.2                | ns     | 3.9    |
|   |   |   | NID1     | nidogen 1                                                                | 4.2                | ns     | 3.7    |
|   |   |   | NPL      | N-acetylneuraminase pyruvate lyase (dihydrodipicolinate synthase)        | 4.1                | ns     | 2.4    |
|   |   |   | VAMP5    | vesicle associated membrane protein 5                                    | 4.1                | ns     | 4.0    |
|   |   |   | DOCK4    | dedicator of cytokinesis 4                                               | 2.1                | ns     | 4.1    |
|   |   |   | SNAI2    | snail family zinc finger 2                                               | 4.0                | ns     | 2.7    |
|   |   |   | ASS1     | argininosuccinate synthase 1                                             | 3.9                | ns     | 2.9    |
|   |   |   | ABCC9    | ATP binding cassette subfamily C member 9                                | 3.1                | ns     | 3.8    |
|   |   |   | TCF4     | transcription factor 4                                                   | 3.8                | ns     | 3.7    |
|   |   |   | DEFB109A | defensin beta 109A (pseudogene)                                          | 3.5                | ns     | 3.7    |
|   |   |   | ICA1     | islet cell autoantigen 1                                                 | 3.7                | ns     | 2.3    |
|   |   |   | SPRY2    | sprouty RTK signaling antagonist 2                                       | 2.1                | ns     | 3.7    |
|   |   |   | MTSS1    | metastasis suppressor 1                                                  | 3.7                | ns     | 2.2    |
|   |   |   | PTPRB    | protein tyrosine phosphatase, receptor type, B                           | 2.7                | ns     | 3.6    |
|   |   |   | FAT4     | FAT atypical cadherin 4                                                  | 3.5                | ns     | 2.9    |
|   |   |   | EPB41L2  | erythrocyte membrane protein band 4.1-like 2                             | 3.5                | ns     | 2.3    |
|   |   |   | PWAR5    | Prader Willi                                                             | 3.4                | ns     | 3.5    |
|   |   |   | MEIS1    | Meis homeobox 1                                                          | 3.4                | ns     | 3.3    |
|   |   |   | ANKRD44  | ankyrin repeat domain 44                                                 | 3.4                | ns     | 2.7    |
|   |   |   | CD93     | CD93 molecule                                                            | 2.9                | ns     | 3.2    |
|   |   |   | ETS1     | v-ets avian erythroblastosis virus E26 oncogene homolog 1                | 2.9                | ns     | 3.2    |
|   |   |   | MEF2C    | myocyte enhancer factor 2C                                               | 3.2                | ns     | 2.5    |

| S | C | E | Symbol       | Name                                                                     | Linear Fold Change |        |        |
|---|---|---|--------------|--------------------------------------------------------------------------|--------------------|--------|--------|
|   |   |   |              |                                                                          | S vs C             | S vs E | E vs C |
|   |   |   | EML1         | echinoderm microtubule associated protein like 1                         | 3.2                | ns     | 2.1    |
|   |   |   | LOC105373192 | uncharacterized LOC105373192                                             | 3.0                | ns     | 3.2    |
|   |   |   | PIK3R3       | phosphoinositide-3-kinase, regulatory subunit 3 (gamma)                  | 2.4                | ns     | 3.0    |
|   |   |   | EAF2         | ELL associated factor 2                                                  | 2.9                | ns     | 2.8    |
|   |   |   | ZEB2         | zinc finger E-box binding homeobox 2                                     | 2.8                | ns     | 2.2    |
|   |   |   | GLUL         | glutamate-ammonia ligase                                                 | 2.8                | ns     | 2.7    |
|   |   |   | ATP8A1       | ATPase, aminophospholipid transporter (APLT), class I, type 8A, member 1 | 2.6                | ns     | 2.6    |
|   |   |   | EFEMP1       | EGF containing fibulin-like extracellular matrix protein 1               | 2.6                | ns     | 2.4    |
|   |   |   | SSBP2        | single-stranded DNA binding protein 2                                    | 2.5                | ns     | 2.2    |
|   |   |   | ARHGEF26     | Rho guanine nucleotide exchange factor 26                                | 2.4                | ns     | 2.5    |
|   |   |   | C1QTNF1      | C1q and tumor necrosis factor related protein 1                          | 2.2                | ns     | 2.5    |
|   |   |   | TEC          | tec protein tyrosine kinase                                              | 2.3                | ns     | 2.5    |
|   |   |   | DEFB109B     | defensin beta 109B                                                       | 2.5                | ns     | 2.2    |
|   |   |   | RESF1        | retroelement silencing factor 1                                          | 2.4                | ns     | 2.1    |
|   |   |   | PLCG2        | phospholipase C, gamma 2 (phosphatidylinositol-specific)                 | 2.2                | ns     | 2.4    |
|   |   |   | FLI1         | Fli-1 proto-oncogene, ETS transcription factor                           | 2.1                | ns     | 2.4    |
|   |   |   | PCDH17       | protocadherin 17                                                         | 2.3                | ns     | 2.4    |
|   |   |   | PTPRJ        | protein tyrosine phosphatase, receptor type, J                           | 2.2                | ns     | 2.3    |
|   |   |   | LOC105375977 | uncharacterized LOC105375977                                             | 2.3                | ns     | 2.1    |
|   |   |   | SNORD114-2   | small nucleolar RNA, C                                                   | ns                 | 22.1   | ns     |
|   |   |   | SNORD114-6   | small nucleolar RNA, C                                                   | ns                 | 20.9   | ns     |
|   |   |   | SNORD114-7   | small nucleolar RNA, C                                                   | ns                 | 20.5   | ns     |
|   |   |   | SNORD114-19  | small nucleolar RNA, C                                                   | ns                 | 16.8   | ns     |
|   |   |   | SNORD114-12  | small nucleolar RNA, C                                                   | ns                 | 14.3   | ns     |
|   |   |   | ERVV-2       | endogenous retrovirus group V, member 2                                  | ns                 | 14.1   | ns     |
|   |   |   | CD36         | CD36 molecule (thrombospondin receptor)                                  | ns                 | 13.4   | ns     |
|   |   |   | ZNF117       | zinc finger protein 117                                                  | ns                 | 13.3   | ns     |
|   |   |   | SNORD114-15  | small nucleolar RNA, C                                                   | ns                 | 13.2   | ns     |
|   |   |   | PABPC4L      | poly(A) binding protein, cytoplasmic 4-like                              | ns                 | 13.0   | ns     |
|   |   |   | SNORD114-13  | small nucleolar RNA, C                                                   | ns                 | 12.2   | ns     |
|   |   |   | SNORD114-17  | small nucleolar RNA, C                                                   | ns                 | 12.2   | ns     |
|   |   |   | SNORD114-11  | small nucleolar RNA, C                                                   | ns                 | 11.6   | ns     |
|   |   |   | ERVV-1       | endogenous retrovirus group V, member 1                                  | ns                 | 10.7   | ns     |
|   |   |   | SNORD113-3   | small nucleolar RNA, C                                                   | ns                 | 10.7   | ns     |
|   |   |   | MIR503       | microRNA 503                                                             | ns                 | 10.2   | ns     |
|   |   |   | PCDH18       | protocadherin 18                                                         | 10.2               | ns     | ns     |
|   |   |   | PLAC1        | placenta specific 1                                                      | ns                 | 9.8    | ns     |
|   |   |   | LOC105378624 | uncharacterized LOC105378624                                             | ns                 | 9.5    | ns     |
|   |   |   | SNORD114-30  | small nucleolar RNA, C                                                   | ns                 | 9.4    | ns     |
|   |   |   | SNORD113-2   | small nucleolar RNA, C                                                   | ns                 | 9.0    | ns     |
|   |   |   | MIR1305      | microRNA 1305                                                            | ns                 | 8.9    | ns     |
|   |   |   | LINC01483    | long intergenic non-protein coding RNA 1483                              | ns                 | 8.7    | ns     |
|   |   |   | SNORD114-3   | small nucleolar RNA, C                                                   | ns                 | 8.7    | ns     |
|   |   |   | SNORD114-27  | small nucleolar RNA, C                                                   | ns                 | 8.5    | ns     |
|   |   |   | SNORD113-9   | small nucleolar RNA, C                                                   | ns                 | 8.2    | ns     |
|   |   |   | LOC105376127 | uncharacterized LOC105376127                                             | ns                 | 7.9    | ns     |
|   |   |   | SNORD114-21  | small nucleolar RNA, C                                                   | ns                 | 7.8    | ns     |
|   |   |   | PCDH11Y      | protocadherin 11 Y-linked                                                | ns                 | 7.4    | ns     |
|   |   |   | SNORD59A     | small nucleolar RNA, C                                                   | ns                 | 7.3    | ns     |
|   |   |   | SNORD114-1   | small nucleolar RNA, C                                                   | ns                 | 7.2    | ns     |
|   |   |   | PSG6         | pregnancy specific beta-1-glycoprotein 6                                 | ns                 | 7.1    | ns     |
|   |   |   | CHODL-AS1    | CHODL antisense RNA 1                                                    | ns                 | 7.1    | ns     |
|   |   |   | PSG11        | pregnancy specific beta-1-glycoprotein 11                                | ns                 | 6.9    | ns     |
|   |   |   | TCF21        | transcription factor 21                                                  | ns                 | 6.8    | ns     |
|   |   |   | SCARNA2      | small Cajal body-specific RNA 2                                          | ns                 | 6.5    | ns     |

| S | C | E | Symbol       | Name                                                                                 | Linear Fold Change |        |        |
|---|---|---|--------------|--------------------------------------------------------------------------------------|--------------------|--------|--------|
|   |   |   |              |                                                                                      | S vs C             | S vs E | E vs C |
|   |   |   | ARHGAP26-IT1 | ARHGAP26 intronic transcript 1                                                       | ns                 | 6.4    | ns     |
|   |   |   | SNORD114-22  | small nucleolar RNA, C                                                               | ns                 | 6.4    | ns     |
|   |   |   | OLR1         | oxidized low density lipoprotein (lectin-like) receptor 1                            | ns                 | 6.3    | ns     |
|   |   |   | ADGRL2       | adhesion G protein-coupled receptor L2                                               | 6.2                | ns     | ns     |
|   |   |   | LOC105375401 | uncharacterized LOC105375401                                                         | ns                 | 6.2    | ns     |
|   |   |   | LOC101927745 | uncharacterized LOC101927745                                                         | ns                 | 6.2    | ns     |
|   |   |   | MIR4659B     | microRNA 4659b                                                                       | ns                 | 6.2    | ns     |
|   |   |   | CLIP4        | CAP-GLY domain containing linker protein family, member 4                            | ns                 | 6.1    | ns     |
|   |   |   | PLCE1-AS1    | PLCE1 antisense RNA 1                                                                | ns                 | 6.0    | ns     |
|   |   |   | MORC4        | MORC family CW-type zinc finger 4                                                    | ns                 | 6.0    | ns     |
|   |   |   | L1TD1        | LINE-1 type transposase domain containing 1                                          | ns                 | 5.9    | ns     |
|   |   |   | LOC101929607 | uncharacterized LOC101929607                                                         | ns                 | 5.9    | ns     |
|   |   |   | GNG11        | guanine nucleotide binding protein (G protein), gamma 11                             | 5.8                | ns     | ns     |
|   |   |   | LOC105370804 | uncharacterized LOC105370804                                                         | ns                 | 5.8    | ns     |
|   |   |   | LOC220729    | succinate dehydrogenase complex, subunit A, flavoprotein (Fp) pseudogene             | ns                 | 5.7    | ns     |
|   |   |   | CASC9        | cancer susceptibility candidate 9 (non-protein coding)                               | ns                 | 5.7    | ns     |
|   |   |   | HELLS        | helicase, lymphoid-specific                                                          | ns                 | 5.6    | ns     |
|   |   |   | SLIT2        | slit guidance ligand 2                                                               | ns                 | 5.6    | ns     |
|   |   |   | TLL1         | tolloid like 1                                                                       | 5.5                | ns     | ns     |
|   |   |   | RAB3B        | RAB3B, member RAS oncogene family                                                    | ns                 | 5.5    | ns     |
|   |   |   | FBN2         | fibrillin 2                                                                          | ns                 | 5.5    | ns     |
|   |   |   | ENPEP        | glutamyl aminopeptidase (aminopeptidase A)                                           | 5.5                | ns     | ns     |
|   |   |   | LOC101927685 | heat shock transcription factor, X-linked-like                                       | ns                 | 5.5    | ns     |
|   |   |   | LOC100508631 | uncharacterized LOC100508631                                                         | ns                 | 5.4    | ns     |
|   |   |   | MAEL         | maelstrom spermatogenic transposon silencer                                          | ns                 | 5.3    | ns     |
|   |   |   | SIK3-IT1     | SIK3 intronic transcript 1                                                           | ns                 | 5.2    | ns     |
|   |   |   | SHANK2       | SH3 and multiple ankyrin repeat domains 2                                            | ns                 | 5.2    | ns     |
|   |   |   | ACP3         | acid phosphatase 3                                                                   | ns                 | 5.2    | ns     |
|   |   |   | NRK          | Nik related kinase                                                                   | ns                 | 5.2    | ns     |
|   |   |   | LOC102725247 | uncharacterized LOC102725247                                                         | ns                 | 5.1    | ns     |
|   |   |   | CD200        | CD200 molecule                                                                       | ns                 | 5.1    | ns     |
|   |   |   | MEG8         | maternally expressed 8 (non-protein coding)                                          | ns                 | 5.1    | ns     |
|   |   |   | SNORD13P2    | small nucleolar RNA, C                                                               | ns                 | 5.0    | ns     |
|   |   |   | AKR1B15      | aldo-keto reductase family 1, member B15                                             | ns                 | 4.9    | ns     |
|   |   |   | LRCH2        | leucine-rich repeats and calponin homology (CH) domain containing 2                  | 4.9                | ns     | ns     |
|   |   |   | SLC16A10     | solute carrier family 16 (aromatic amino acid transporter), member 10                | ns                 | 4.9    | ns     |
|   |   |   | DLG5         | discs, large homolog 5 (Drosophila)                                                  | ns                 | 4.9    | ns     |
|   |   |   | DHRS2        | dehydrogenase                                                                        | ns                 | 4.9    | ns     |
|   |   |   | GUCY1A2      | guanylate cyclase 1, soluble, alpha 2                                                | 4.8                | ns     | ns     |
|   |   |   | NFE2L3       | nuclear factor, erythroid 2-like 3                                                   | ns                 | 4.8    | ns     |
|   |   |   | SNORD116-21  | small nucleolar RNA, C                                                               | 4.7                | ns     | ns     |
|   |   |   | MIRLET7F1    | microRNA let-7f-1                                                                    | ns                 | 4.7    | ns     |
|   |   |   | SNORD113-7   | small nucleolar RNA, C                                                               | ns                 | 4.7    | ns     |
|   |   |   | LOC105376236 | uncharacterized LOC105376236                                                         | ns                 | 4.6    | ns     |
|   |   |   | RASSF6       | Ras association (RalGDS                                                              | ns                 | 4.6    | ns     |
|   |   |   | S100A9       | S100 calcium binding protein A9                                                      | ns                 | 4.6    | ns     |
|   |   |   | BDP1         | B double prime 1, subunit of RNA polymerase III transcription initiation factor IIIB | ns                 | 4.6    | ns     |
|   |   |   | PSG4         | pregnancy specific beta-1-glycoprotein 4                                             | ns                 | 4.6    | ns     |
|   |   |   | OR52E6       | olfactory receptor, family 52, subfamily E, member 6                                 | ns                 | 4.5    | ns     |
|   |   |   | HAPLN1       | hyaluronan and proteoglycan link protein 1                                           | ns                 | 4.4    | ns     |
|   |   |   | LOC105377649 | uncharacterized LOC105377649                                                         | ns                 | 4.4    | ns     |
|   |   |   | LOC105371225 | uncharacterized LOC105371225                                                         | ns                 | 4.4    | ns     |
|   |   |   | LIPG         | lipase, endothelial                                                                  | ns                 | 4.4    | ns     |
|   |   |   | GH1          | growth hormone 1                                                                     | ns                 | 4.4    | ns     |
|   |   |   | SNORD114-8   | small nucleolar RNA, C                                                               | ns                 | 4.4    | ns     |



| S | C | E | Symbol       | Name                                                                 | Linear Fold Change |        |        |
|---|---|---|--------------|----------------------------------------------------------------------|--------------------|--------|--------|
|   |   |   |              |                                                                      | S vs C             | S vs E | E vs C |
|   |   |   | OR7E91P      | olfactory receptor, family 7, subfamily E, member 91 pseudogene      | ns                 | 4.3    | ns     |
|   |   |   | CCDC68       | coiled-coil domain containing 68                                     | ns                 | 4.3    | ns     |
|   |   |   | XDH          | xanthine dehydrogenase                                               | ns                 | 4.3    | ns     |
|   |   |   | COL6A3       | collagen, type VI, alpha 3                                           | 4.3                | ns     | ns     |
|   |   |   | LOC101927359 | uncharacterized LOC101927359                                         | ns                 | 4.3    | ns     |
|   |   |   | LOC644919    | uncharacterized LOC644919                                            | ns                 | 4.3    | ns     |
|   |   |   | NDNF         | neuron-derived neurotrophic factor                                   | 4.2                | ns     | ns     |
|   |   |   | TUSC3        | tumor suppressor candidate 3                                         | ns                 | 4.2    | ns     |
|   |   |   | LOC105377196 | uncharacterized LOC105377196                                         | ns                 | 4.2    | ns     |
|   |   |   | PDE3B        | phosphodiesterase 3B, cGMP-inhibited                                 | ns                 | 4.2    | ns     |
|   |   |   | LOC101928794 | uncharacterized LOC101928794                                         | ns                 | 4.2    | ns     |
|   |   |   | CXADRP2      | coxsackie virus and adenovirus receptor pseudogene 2                 | ns                 | 4.2    | ns     |
|   |   |   | ITGB3        | integrin beta 3                                                      | 4.2                | ns     | ns     |
|   |   |   | MIR29C       | microRNA 29c                                                         | ns                 | 4.2    | ns     |
|   |   |   | CDS1         | CDP-diacylglycerol synthase 1                                        | ns                 | 4.2    | ns     |
|   |   |   | GUCY1A1      | guanylate cyclase 1 soluble subunit alpha 1                          | 4.2                | ns     | ns     |
|   |   |   | MAP3K13      | mitogen-activated protein kinase kinase kinase 13                    | ns                 | 4.1    | ns     |
|   |   |   | DAB2         | Dab, mitogen-responsive phosphoprotein, homolog 2 (Drosophila)       | ns                 | 4.1    | ns     |
|   |   |   | NAALADL2-AS3 | NAALADL2 antisense RNA 3                                             | ns                 | 4.1    | ns     |
|   |   |   | PSG2         | pregnancy specific beta-1-glycoprotein 2                             | ns                 | 4.0    | ns     |
|   |   |   | LOC102723920 | uncharacterized LOC102723920                                         | ns                 | 4.0    | ns     |
|   |   |   | SLC30A2      | solute carrier family 30 (zinc transporter), member 2                | ns                 | 4.0    | ns     |
|   |   |   | CKAP2L       | cytoskeleton associated protein 2-like                               | ns                 | 4.0    | ns     |
|   |   |   | FCGR2B       | Fc fragment of IgG, low affinity IIb, receptor (CD32)                | 3.9                | ns     | ns     |
|   |   |   | MIR3650      | microRNA 3650                                                        | ns                 | 3.9    | ns     |
|   |   |   | ZNF354B      | zinc finger protein 354B                                             | ns                 | 3.9    | ns     |
|   |   |   | MIR17HG      | miR-17-92 cluster host gene                                          | ns                 | 3.9    | ns     |
|   |   |   | LINC00622    | long intergenic non-protein coding RNA 622                           | ns                 | 3.9    | ns     |
|   |   |   | LOC100507487 | uncharacterized LOC100507487                                         | ns                 | 3.9    | ns     |
|   |   |   | RHOBTB3      | Rho-related BTB domain containing 3                                  | ns                 | 3.9    | ns     |
|   |   |   | LOC102723908 | uncharacterized LOC102723908                                         | ns                 | 3.9    | ns     |
|   |   |   | PSCA         | prostate stem cell antigen                                           | ns                 | 3.9    | ns     |
|   |   |   | C2orf81      | chromosome 2 open reading frame 81                                   | ns                 | 3.8    | ns     |
|   |   |   | MGC12916     | uncharacterized protein MGC12916                                     | ns                 | 3.7    | ns     |
|   |   |   | LOC105378300 | uncharacterized LOC105378300                                         | ns                 | 3.8    | ns     |
|   |   |   | TCHHL1       | trichohyalin like 1                                                  | ns                 | 3.8    | ns     |
|   |   |   | LOC105369897 | uncharacterized LOC105369897                                         | ns                 | 3.8    | ns     |
|   |   |   | IL1RAPL2     | interleukin 1 receptor accessory protein-like 2                      | ns                 | 3.7    | ns     |
|   |   |   | AGO2         | argonaute RISC catalytic component 2                                 | ns                 | 3.7    | ns     |
|   |   |   | PBK          | PDZ binding kinase                                                   | ns                 | 3.7    | ns     |
|   |   |   | EMSY         | EMSY BRCA2-interacting transcriptional repressor                     | ns                 | 3.7    | ns     |
|   |   |   | SDHAP2       | succinate dehydrogenase complex subunit A, flavoprotein pseudogene 2 | ns                 | 3.7    | ns     |
|   |   |   | PLGLB1       | plasminogen-like B1                                                  | ns                 | 3.7    | ns     |
|   |   |   | SEMA6D       | semaphorin 6D                                                        | ns                 | 3.7    | ns     |
|   |   |   | TMEM247      | transmembrane protein 247                                            | ns                 | 3.7    | ns     |
|   |   |   | ZNF521       | zinc finger protein 521                                              | 3.6                | ns     | ns     |
|   |   |   | DUBR         | DPPA2 upstream binding RNA                                           | ns                 | 3.6    | ns     |
|   |   |   | NAALADL2     | N-acetylated alpha-linked acidic dipeptidase-like 2                  | ns                 | 3.6    | ns     |
|   |   |   | TAB3         | TGF-beta activated kinase 1                                          | ns                 | 3.6    | ns     |
|   |   |   | LRRN3        | leucine rich repeat neuronal 3                                       | ns                 | 3.6    | ns     |
|   |   |   | SLC6A15      | solute carrier family 6 (neutral amino acid transporter), member 15  | ns                 | 3.6    | ns     |
|   |   |   | GTF2IP20     | general transcription factor Ili pseudogene 20                       | ns                 | 3.5    | ns     |
|   |   |   | RBMS3        | RNA binding motif, single stranded interacting protein 3             | ns                 | 3.5    | ns     |
|   |   |   | PDZD2        | PDZ domain containing 2                                              | ns                 | 3.5    | ns     |
|   |   |   | LOC100134868 | uncharacterized LOC100134868                                         | ns                 | 3.5    | ns     |



| S | C | E | Symbol       | Name                                                                 | Linear Fold Change |        |        |
|---|---|---|--------------|----------------------------------------------------------------------|--------------------|--------|--------|
|   |   |   |              |                                                                      | S vs C             | S vs E | E vs C |
|   |   |   | ADIRF        | adipogenesis regulatory factor                                       | 3.5                | ns     | ns     |
|   |   |   | MIR487B      | microRNA 487b                                                        | ns                 | 3.5    | ns     |
|   |   |   | LOC102723439 | uncharacterized LOC102723439                                         | ns                 | 3.5    | ns     |
|   |   |   | SNORA38B     | small nucleolar RNA, H                                               | ns                 | 3.5    | ns     |
|   |   |   | KCNK5        | potassium channel, two pore domain subfamily K, member 5             | ns                 | 3.5    | ns     |
|   |   |   | OGFRL1       | opioid growth factor receptor-like 1                                 | 3.4                | ns     | ns     |
|   |   |   | TFRC         | transferrin receptor                                                 | ns                 | 3.4    | ns     |
|   |   |   | SCN9A        | sodium channel, voltage gated, type IX alpha subunit                 | ns                 | 3.4    | ns     |
|   |   |   | LONP2        | lon peptidase 2, peroxisomal                                         | ns                 | 3.4    | ns     |
|   |   |   | ATG9B        | autophagy related 9B                                                 | ns                 | 3.4    | ns     |
|   |   |   | SERPINF1     | serpin peptidase inhibitor F1                                        | ns                 | 3.4    | ns     |
|   |   |   | MIRLET7G     | microRNA let-7g                                                      | ns                 | 3.4    | ns     |
|   |   |   | RAPGEF5      | Rap guanine nucleotide exchange factor 5                             | 3.4                | ns     | ns     |
|   |   |   | EXOC6        | exocyst complex component 6                                          | 3.4                | ns     | ns     |
|   |   |   | CARD17       | caspase recruitment domain family, member 17                         | ns                 | 3.4    | ns     |
|   |   |   | FBXO9        | F-box protein 9                                                      | ns                 | 3.4    | ns     |
|   |   |   | MTNR1B       | melatonin receptor 1B                                                | ns                 | 3.4    | ns     |
|   |   |   | LOC389765    | kinesin family member 27 pseudogene                                  | ns                 | 3.4    | ns     |
|   |   |   | ZNF83        | zinc finger protein 83                                               | ns                 | 3.3    | ns     |
|   |   |   | MIR581       | microRNA 581                                                         | ns                 | 3.3    | ns     |
|   |   |   | ARL15        | ADP-ribosylation factor like GTPase 15                               | ns                 | 3.3    | ns     |
|   |   |   | LINC01091    | long intergenic non-protein coding RNA 1091                          | ns                 | 3.3    | ns     |
|   |   |   | LOC102724917 | uncharacterized LOC102724917                                         | ns                 | 3.3    | ns     |
|   |   |   | SDHAP1       | succinate dehydrogenase complex subunit A, flavoprotein pseudogene 1 | ns                 | 3.3    | ns     |
|   |   |   | NFIB         | nuclear factor I                                                     | 3.3                | ns     | ns     |
|   |   |   | RIMKLB       | ribosomal modification protein rimK-like family member B             | ns                 | 3.3    | ns     |
|   |   |   | LOC101929787 | uncharacterized LOC101929787                                         | ns                 | 3.3    | ns     |
|   |   |   | DUSP6        | dual specificity phosphatase 6                                       | 3.3                | ns     | ns     |
|   |   |   | RNF43        | ring finger protein 43                                               | ns                 | 3.3    | ns     |
|   |   |   | LOC100133331 | uncharacterized LOC100133331                                         | ns                 | 3.3    | ns     |
|   |   |   | XKRX         | X-linked Kx blood group related, X-linked                            | ns                 | 3.3    | ns     |
|   |   |   | LOC101926892 | uncharacterized LOC101926892                                         | ns                 | 3.3    | ns     |
|   |   |   | LOC101928324 | uncharacterized LOC101928324                                         | ns                 | 3.3    | ns     |
|   |   |   | CYTH3        | cytohesin 3                                                          | ns                 | 3.3    | ns     |
|   |   |   | ITGBL1       | integrin beta like 1                                                 | ns                 | 3.2    | ns     |
|   |   |   | NPIP4        | nuclear pore complex interacting protein family, member B4           | ns                 | 3.2    | ns     |
|   |   |   | LINC01355    | long intergenic non-protein coding RNA 1355                          | ns                 | 3.2    | ns     |
|   |   |   | CLMN         | calmin (calponin-like, transmembrane)                                | ns                 | 3.2    | ns     |
|   |   |   | ZFP2         | ZFP2 zinc finger protein                                             | ns                 | 3.2    | ns     |
|   |   |   | DVL3         | dishevelled segment polarity protein 3                               | ns                 | 3.2    | ns     |
|   |   |   | NIPAL1       | NIPA-like domain containing 1                                        | ns                 | 3.2    | ns     |
|   |   |   | WARS1        | tryptophanyl-tRNA synthetase 1                                       | 3.2                | ns     | ns     |
|   |   |   | TTBK2        | tau tubulin kinase 2                                                 | ns                 | 3.2    | ns     |
|   |   |   | SYCP2L       | synaptonemal complex protein 2-like                                  | ns                 | 3.2    | ns     |
|   |   |   | SNAR-G1      | small ILF3                                                           | ns                 | 3.2    | ns     |
|   |   |   | HBA2         | hemoglobin, alpha 2                                                  | 3.2                | ns     | ns     |
|   |   |   | LINC00939    | long intergenic non-protein coding RNA 939                           | ns                 | 3.2    | ns     |
|   |   |   | MMD          | monocyte to macrophage differentiation-associated                    | ns                 | 3.2    | ns     |
|   |   |   | CYYR1        | cysteine                                                             | 3.2                | ns     | ns     |
|   |   |   | CLIP1-AS1    | CLIP1 antisense RNA 1                                                | ns                 | 3.2    | ns     |
|   |   |   | SCIN         | scinderin                                                            | ns                 | 3.2    | ns     |
|   |   |   | ST3GAL4      | ST3 beta-galactoside alpha-2,3-sialyltransferase 4                   | ns                 | 3.1    | ns     |
|   |   |   | ELMO1-AS1    | ELMO1 antisense RNA 1                                                | ns                 | 3.1    | ns     |
|   |   |   | RGPD6        | RANBP2-like and GRIP domain containing 6                             | ns                 | 3.1    | ns     |
|   |   |   | IKZF2        | IKAROS family zinc finger 2                                          | ns                 | 3.1    | ns     |

| S | C | E | Symbol       | Name                                                                                                 | Linear Fold Change |        |        |
|---|---|---|--------------|------------------------------------------------------------------------------------------------------|--------------------|--------|--------|
|   |   |   |              |                                                                                                      | S vs C             | S vs E | E vs C |
|   |   |   | SLC45A4      | solute carrier family 45, member 4                                                                   | 3.1                | ns     | ns     |
|   |   |   | FAM124B      | family with sequence similarity 124 member B                                                         | ns                 | 3.1    | ns     |
|   |   |   | BEX2         | brain expressed X-linked 2                                                                           | ns                 | 3.1    | ns     |
|   |   |   | OCLN         | occludin                                                                                             | ns                 | 3.1    | ns     |
|   |   |   | SPIRE2       | spire-type actin nucleation factor 2                                                                 | ns                 | 3.1    | ns     |
|   |   |   | LOC101928344 | protein GVQW1-like                                                                                   | ns                 | 3.1    | ns     |
|   |   |   | RGPD8        | RANBP2-like and GRIP domain containing 8                                                             | ns                 | 3.1    | ns     |
|   |   |   | SYNJ1        | synaptojanin 1                                                                                       | ns                 | 3.1    | ns     |
|   |   |   | DHCR24       | 24-dehydrocholesterol reductase                                                                      | ns                 | 3.1    | ns     |
|   |   |   | LOC100505938 | uncharacterized LOC100505938                                                                         | ns                 | 3.1    | ns     |
|   |   |   | PLSCR4       | phospholipid scramblase 4                                                                            | 3.1                | ns     | ns     |
|   |   |   | C21orf91     | chromosome 21 open reading frame 91                                                                  | ns                 | 3.1    | ns     |
|   |   |   | LRRTM2       | leucine rich repeat transmembrane neuronal 2                                                         | ns                 | 3.1    | ns     |
|   |   |   | GPNMB        | glycoprotein (transmembrane) nmb                                                                     | 3.1                | ns     | ns     |
|   |   |   | CCNE2        | cyclin E2                                                                                            | ns                 | 3.0    | ns     |
|   |   |   | SH3GLB2      | SH3-domain GRB2-like endophilin B2                                                                   | ns                 | 3.0    | ns     |
|   |   |   | DHRX         | dehydrogenase                                                                                        | ns                 | 3.0    | ns     |
|   |   |   | LOC101929494 | uncharacterized LOC101929494                                                                         | ns                 | 3.0    | ns     |
|   |   |   | GJC1         | gap junction protein gamma 1                                                                         | 3.0                | ns     | ns     |
|   |   |   | ORC6         | origin recognition complex subunit 6                                                                 | ns                 | 3.0    | ns     |
|   |   |   | STX3         | syntaxin 3                                                                                           | ns                 | 3.0    | ns     |
|   |   |   | CCNB2        | cyclin B2                                                                                            | ns                 | 2.9    | ns     |
|   |   |   | SLIT2-IT1    | SLIT2 intronic transcript 1                                                                          | ns                 | 3.0    | ns     |
|   |   |   | CEP152       | centrosomal protein 152kDa                                                                           | ns                 | 3.0    | ns     |
|   |   |   | SH3GL1P2     | SH3-domain GRB2-like 1 pseudogene 2                                                                  | ns                 | 3.0    | ns     |
|   |   |   | LOC105371471 | uncharacterized LOC105371471                                                                         | ns                 | 3.0    | ns     |
|   |   |   | SPDYE6       | speedy                                                                                               | ns                 | 3.0    | ns     |
|   |   |   | LOC105374911 | uncharacterized LOC105374911                                                                         | ns                 | 3.0    | ns     |
|   |   |   | MIR223       | microRNA 223                                                                                         | ns                 | 3.0    | ns     |
|   |   |   | CSGALNACT1   | chondroitin sulfate N-acetylgalactosaminyltransferase 1                                              | ns                 | 3.0    | ns     |
|   |   |   | PAQR7        | progesterin and adipoQ receptor family member VII                                                    | ns                 | 3.0    | ns     |
|   |   |   | CGB7         | chorionic gonadotropin, beta polypeptide 7                                                           | ns                 | 2.9    | ns     |
|   |   |   | ADGRG1       | adhesion G protein-coupled receptor G1                                                               | ns                 | 2.9    | ns     |
|   |   |   | MIR218-1     | microRNA 218-1                                                                                       | ns                 | 2.9    | ns     |
|   |   |   | ZNF250       | zinc finger protein 250                                                                              | ns                 | 2.9    | ns     |
|   |   |   | AMMECR1      | Alport syndrome, mental retardation, midface hypoplasia and elliptocytosis chromosomal region gene 1 | ns                 | 2.9    | ns     |
|   |   |   | LOC101930100 | uncharacterized LOC101930100                                                                         | ns                 | 2.9    | ns     |
|   |   |   | LOC100133091 | uncharacterized LOC100133091                                                                         | ns                 | 2.9    | ns     |
|   |   |   | LRIG3        | leucine-rich repeats and immunoglobulin-like domains 3                                               | 2.9                | ns     | ns     |
|   |   |   | LOC101929709 | uncharacterized LOC101929709                                                                         | ns                 | 2.9    | ns     |
|   |   |   | EPHB4        | EPH receptor B4                                                                                      | ns                 | 2.9    | ns     |
|   |   |   | ANKRD20A2P   | ankyrin repeat domain 20 family member A2, pseudogene                                                | ns                 | 2.9    | ns     |
|   |   |   | TRIM25       | tripartite motif containing 25                                                                       | ns                 | 2.9    | ns     |
|   |   |   | PDXDC2P      | pyridoxal-dependent decarboxylase domain containing 2, pseudogene                                    | ns                 | 2.9    | ns     |
|   |   |   | GGCT         | gamma-glutamylcyclotransferase                                                                       | ns                 | 2.9    | ns     |
|   |   |   | LOC105369204 | uncharacterized LOC105369204                                                                         | 2.9                | ns     | ns     |
|   |   |   | ACADVL       | acyl-CoA dehydrogenase, very long chain                                                              | ns                 | 2.9    | ns     |
|   |   |   | BTG2         | BTG family, member 2                                                                                 | 2.9                | ns     | ns     |
|   |   |   | BCL2         | B-cell CLL                                                                                           | 2.9                | ns     | ns     |
|   |   |   | AUNIP        | aurora kinase A and ninein interacting protein                                                       | ns                 | 2.9    | ns     |
|   |   |   | SH2D4A       | SH2 domain containing 4A                                                                             | ns                 | 2.9    | ns     |
|   |   |   | LIN28B       | lin-28 homolog B (C. elegans)                                                                        | ns                 | 2.9    | ns     |
|   |   |   | MCM6         | minichromosome maintenance complex component 6                                                       | ns                 | 2.9    | ns     |
|   |   |   | AGL          | amylo-alpha-1, 6-glucosidase, 4-alpha-glucanotransferase                                             | ns                 | 2.9    | ns     |
|   |   |   | ARRDC3-AS1   | ARRDC3 antisense RNA 1                                                                               | ns                 | 2.9    | ns     |

| S | C | E | Symbol       | Name                                                                                           | Linear Fold Change |        |        |
|---|---|---|--------------|------------------------------------------------------------------------------------------------|--------------------|--------|--------|
|   |   |   |              |                                                                                                | S vs C             | S vs E | E vs C |
|   |   |   | TOMM34       | translocase of outer mitochondrial membrane 34                                                 | ns                 | 2.9    | ns     |
|   |   |   | CNN3         | calponin 3, acidic                                                                             | ns                 | 2.9    | ns     |
|   |   |   | VSTM5        | V-set and transmembrane domain containing 5                                                    | ns                 | 2.8    | ns     |
|   |   |   | LOC100506606 | uncharacterized LOC100506606                                                                   | ns                 | 2.8    | ns     |
|   |   |   | RERG-AS1     | RERG antisense RNA 1                                                                           | ns                 | 2.8    | ns     |
|   |   |   | LOC105376073 | uncharacterized LOC105376073                                                                   | ns                 | 2.8    | ns     |
|   |   |   | MIR521-1     | microRNA 521-1                                                                                 | ns                 | 2.8    | ns     |
|   |   |   | LOC101930131 | uncharacterized LOC101930131                                                                   | ns                 | 2.8    | ns     |
|   |   |   | PGF          | placental growth factor                                                                        | ns                 | 2.8    | ns     |
|   |   |   | NUFIP2       | nuclear fragile X mental retardation protein interacting protein 2                             | ns                 | 2.8    | ns     |
|   |   |   | SECISBP2L    | SECIS binding protein 2-like                                                                   | ns                 | 2.8    | ns     |
|   |   |   | MAP3K4       | mitogen-activated protein kinase kinase kinase 4                                               | ns                 | 2.8    | ns     |
|   |   |   | AKTIP        | AKT interacting protein                                                                        | ns                 | 2.8    | ns     |
|   |   |   | ZC2HC1A      | zinc finger, C2HC-type containing 1A                                                           | ns                 | 2.8    | ns     |
|   |   |   | RPIA         | ribose 5-phosphate isomerase A                                                                 | ns                 | 2.8    | ns     |
|   |   |   | PSTIP2       | proline-serine-threonine phosphatase interacting protein 2                                     | ns                 | 2.8    | ns     |
|   |   |   | HSD17B1P1    | hydroxysteroid (17-beta) dehydrogenase 1 pseudogene 1                                          | ns                 | 2.8    | ns     |
|   |   |   | CRYBG2       | crystallin beta-gamma domain containing 2                                                      | ns                 | 2.8    | ns     |
|   |   |   | ADAM20       | ADAM metalloproteinase domain 20                                                               | ns                 | 2.8    | ns     |
|   |   |   | LOC105369468 | uncharacterized LOC105369468                                                                   | ns                 | 2.8    | ns     |
|   |   |   | RGPD1        | RANBP2-like and GRIP domain containing 1                                                       | ns                 | 2.8    | ns     |
|   |   |   | NDC80        | NDC80 kinetochore complex component                                                            | ns                 | 2.8    | ns     |
|   |   |   | LOC101929570 | uncharacterized LOC101929570                                                                   | ns                 | 2.8    | ns     |
|   |   |   | TTC7B        | tetratricopeptide repeat domain 7B                                                             | ns                 | 2.8    | ns     |
|   |   |   | LOC101928472 | uncharacterized LOC101928472                                                                   | ns                 | 2.8    | ns     |
|   |   |   | ALDH7A1      | aldehyde dehydrogenase 7 family, member A1                                                     | ns                 | 2.8    | ns     |
|   |   |   | LOC105374895 | uncharacterized LOC105374895                                                                   | ns                 | 2.8    | ns     |
|   |   |   | NEDD4        | neural precursor cell expressed, developmentally down-regulated 4, E3 ubiquitin protein ligase | ns                 | 2.8    | ns     |
|   |   |   | USP43        | ubiquitin specific peptidase 43                                                                | ns                 | 2.8    | ns     |
|   |   |   | EGFR         | epidermal growth factor receptor                                                               | ns                 | 2.8    | ns     |
|   |   |   | STARD4       | StAR-related lipid transfer domain containing 4                                                | ns                 | 2.8    | ns     |
|   |   |   | PIK3C2B      | phosphatidylinositol-4-phosphate 3-kinase, catalytic subunit type 2 beta                       | ns                 | 2.7    | ns     |
|   |   |   | RPS6KA6      | ribosomal protein S6 kinase, 90kDa, polypeptide 6                                              | ns                 | 2.7    | ns     |
|   |   |   | HERC2P4      | hect domain and RLD 2 pseudogene 4                                                             | ns                 | 2.7    | ns     |
|   |   |   | MRTFB        | myocardin related transcription factor B                                                       | ns                 | 2.7    | ns     |
|   |   |   | SHCBP1       | SHC SH2-domain binding protein 1                                                               | ns                 | 2.7    | ns     |
|   |   |   | NPIP11       | nuclear pore complex interacting protein family, member B11                                    | ns                 | 2.7    | ns     |
|   |   |   | BCORL1       | BCL6 corepressor-like 1                                                                        | ns                 | 2.7    | ns     |
|   |   |   | SPATA9       | spermatogenesis associated 9                                                                   | ns                 | 2.7    | ns     |
|   |   |   | RFX2         | regulatory factor X, 2 (influences HLA class II expression)                                    | ns                 | 2.7    | ns     |
|   |   |   | MARVELD3     | MARVEL domain containing 3                                                                     | ns                 | 2.7    | ns     |
|   |   |   | LOC101929461 | uncharacterized LOC101929461                                                                   | ns                 | 2.7    | ns     |
|   |   |   | PCAT19       | prostate cancer associated transcript 19 (non-protein coding)                                  | 2.7                | ns     | ns     |
|   |   |   | ALDH4A1      | aldehyde dehydrogenase 4 family, member A1                                                     | ns                 | 2.7    | ns     |
|   |   |   | NPIPA1       | nuclear pore complex interacting protein family member A1                                      | ns                 | 2.7    | ns     |
|   |   |   | LYPD5        | LY6                                                                                            | ns                 | 2.7    | ns     |
|   |   |   | TGM2         | transglutaminase 2                                                                             | 2.7                | ns     | ns     |
|   |   |   | OR6W1P       | olfactory receptor, family 6, subfamily W, member 1 pseudogene                                 | ns                 | 2.7    | ns     |
|   |   |   | DCAF1        | DDB1 and CUL4 associated factor 1                                                              | ns                 | 2.7    | ns     |
|   |   |   | GAP43        | growth associated protein 43                                                                   | ns                 | 2.7    | ns     |
|   |   |   | NAPB         | N-ethylmaleimide-sensitive factor attachment protein, beta                                     | ns                 | 2.7    | ns     |
|   |   |   | ARGLU1       | arginine and glutamate rich 1                                                                  | ns                 | 2.7    | ns     |
|   |   |   | CCL28        | chemokine (C-C motif) ligand 28                                                                | ns                 | 2.7    | ns     |
|   |   |   | LMO7         | LIM domain 7                                                                                   | ns                 | 2.7    | ns     |
|   |   |   | CAT          | catalase                                                                                       | 2.7                | ns     | ns     |

| S | C | E | Symbol       | Name                                                            | Linear Fold Change |        |        |
|---|---|---|--------------|-----------------------------------------------------------------|--------------------|--------|--------|
|   |   |   |              |                                                                 | S vs C             | S vs E | E vs C |
|   |   |   | SOS2         | SOS Ras                                                         | ns                 | 2.7    | ns     |
|   |   |   | ZNF443       | zinc finger protein 443                                         | ns                 | 2.7    | ns     |
|   |   |   | ZNRF3        | zinc and ring finger 3                                          | ns                 | 2.7    | ns     |
|   |   |   | ZNF525       | zinc finger protein 525                                         | ns                 | 2.7    | ns     |
|   |   |   | ECI2         | enoyl-CoA delta isomerase 2                                     | 2.7                | ns     | ns     |
|   |   |   | HYMAI        | hydatidiform mole associated and imprinted (non-protein coding) | ns                 | 2.6    | ns     |
|   |   |   | NEMP1        | nuclear envelope integral membrane protein 1                    | ns                 | 2.7    | ns     |
|   |   |   | RGPD3        | RANBP2-like and GRIP domain containing 3                        | ns                 | 2.6    | ns     |
|   |   |   | NPIP3        | nuclear pore complex interacting protein family, member B3      | ns                 | 2.6    | ns     |
|   |   |   | NPIP3        | nuclear pore complex interacting protein family, member B3      | ns                 | 2.6    | ns     |
|   |   |   | NPIP9        | nuclear pore complex interacting protein family, member B9      | ns                 | 2.6    | ns     |
|   |   |   | PCP4         | Purkinje cell protein 4                                         | ns                 | 2.6    | ns     |
|   |   |   | FILIP1       | filamin A interacting protein 1                                 | ns                 | 2.6    | ns     |
|   |   |   | ADAMTSL3     | ADAMTS like 3                                                   | ns                 | 2.6    | ns     |
|   |   |   | PEAK1        | pseudopodium-enriched atypical kinase 1                         | 2.6                | ns     | ns     |
|   |   |   | H2BC21       | H2B clustered histone 21                                        | ns                 | 2.6    | ns     |
|   |   |   | ATXN7        | ataxin 7                                                        | ns                 | 2.6    | ns     |
|   |   |   | PITX2        | paired-like homeodomain 2                                       | ns                 | 2.6    | ns     |
|   |   |   | IL36RN       | interleukin 36 receptor antagonist                              | ns                 | 2.6    | ns     |
|   |   |   | CPPED1       | calcineurin-like phosphoesterase domain containing 1            | ns                 | 2.6    | ns     |
|   |   |   | GRIK1        | glutamate receptor, ionotropic, kainate 1                       | ns                 | 2.6    | ns     |
|   |   |   | LARP4B       | La ribonucleoprotein domain family, member 4B                   | ns                 | 2.6    | ns     |
|   |   |   | LOC105379161 | uncharacterized LOC105379161                                    | ns                 | 2.6    | ns     |
|   |   |   | DLG1         | discs, large homolog 1 (Drosophila)                             | ns                 | 2.6    | ns     |
|   |   |   | NPIP5        | nuclear pore complex interacting protein family, member B5      | ns                 | 2.6    | ns     |
|   |   |   | RMI2         | RecQ mediated genome instability 2                              | ns                 | 2.6    | ns     |
|   |   |   | STEAP3       | STEAP family member 3, metalloredutase                          | ns                 | 2.6    | ns     |
|   |   |   | CCDC125      | coiled-coil domain containing 125                               | ns                 | 2.6    | ns     |
|   |   |   | PCP4L1       | Purkinje cell protein 4 like 1                                  | ns                 | 2.6    | ns     |
|   |   |   | TRIM33       | tripartite motif containing 33                                  | ns                 | 2.6    | ns     |
|   |   |   | MTMR1        | myotubularin related protein 1                                  | ns                 | 2.6    | ns     |
|   |   |   | RBM22        | RNA binding motif protein 22                                    | ns                 | 2.6    | ns     |
|   |   |   | PPP1R9A      | protein phosphatase 1, regulatory subunit 9A                    | ns                 | 2.6    | ns     |
|   |   |   | SIK3         | SIK family kinase 3                                             | ns                 | 2.6    | ns     |
|   |   |   | RASGRP3      | RAS guanyl releasing protein 3 (calcium and DAG-regulated)      | 2.6                | ns     | ns     |
|   |   |   | LINC00643    | long intergenic non-protein coding RNA 643                      | ns                 | 2.6    | ns     |
|   |   |   | TFDP2        | transcription factor Dp-2 (E2F dimerization partner 2)          | ns                 | 2.6    | ns     |
|   |   |   | RBL1         | retinoblastoma-like 1                                           | ns                 | 2.6    | ns     |
|   |   |   | KCNN4        | potassium channel, calcium activated intermediate               | ns                 | 2.6    | ns     |
|   |   |   | LOC105374155 | uncharacterized LOC105374155                                    | ns                 | 2.6    | ns     |
|   |   |   | ABCA5        | ATP binding cassette subfamily A member 5                       | ns                 | 2.6    | ns     |
|   |   |   | RBBP7        | retinoblastoma binding protein 7                                | ns                 | 2.6    | ns     |
|   |   |   | EFNB2        | ephrin-B2                                                       | 2.6                | ns     | ns     |
|   |   |   | LINC01061    | long intergenic non-protein coding RNA 1061                     | ns                 | 2.6    | ns     |
|   |   |   | SMAD7        | SMAD family member 7                                            | ns                 | 2.6    | ns     |
|   |   |   | LOC100288069 | uncharacterized LOC100288069                                    | ns                 | 2.5    | ns     |
|   |   |   | GPD1L        | glycerol-3-phosphate dehydrogenase 1-like                       | ns                 | 2.5    | ns     |
|   |   |   | FAR2         | fatty acyl-CoA reductase 2                                      | ns                 | 2.5    | ns     |
|   |   |   | KCTD3        | potassium channel tetramerization domain containing 3           | ns                 | 2.5    | ns     |
|   |   |   | ACBD6        | acyl-CoA binding domain containing 6                            | ns                 | 2.5    | ns     |
|   |   |   | SLAIN1       | SLAIN motif family member 1                                     | 2.5                | ns     | ns     |
|   |   |   | TRIM55       | tripartite motif containing 55                                  | ns                 | 2.5    | ns     |
|   |   |   | BAGE2        | B melanoma antigen family, member 2                             | ns                 | 2.5    | ns     |
|   |   |   | LOC100996442 | uncharacterized LOC100996442                                    | ns                 | 2.5    | ns     |
|   |   |   | MCUB         | mitochondrial calcium uniporter dominant negative subunit beta  | ns                 | 2.5    | ns     |
|   |   |   | UTRN         | utrophin                                                        | 2.5                | ns     | ns     |



| S | C | E | Symbol       | Name                                                                              | Linear Fold Change |        |        |
|---|---|---|--------------|-----------------------------------------------------------------------------------|--------------------|--------|--------|
|   |   |   |              |                                                                                   | S vs C             | S vs E | E vs C |
|   |   |   | RFTN2        | raftlin family member 2                                                           | 2.5                | ns     | ns     |
|   |   |   | MTM1         | myotubularin 1                                                                    | ns                 | 2.5    | ns     |
|   |   |   | ENOSF1       | enolase superfamily member 1                                                      | ns                 | 2.5    | ns     |
|   |   |   | TBC1D32      | TBC1 domain family, member 32                                                     | ns                 | 2.5    | ns     |
|   |   |   | KCTD4        | potassium channel tetramerization domain containing 4                             | ns                 | 2.5    | ns     |
|   |   |   | DIO3         | deiodinase, iodothyronine, type III                                               | ns                 | 2.5    | ns     |
|   |   |   | GAS2L3       | growth arrest-specific 2 like 3                                                   | ns                 | 2.5    | ns     |
|   |   |   | MCM3         | minichromosome maintenance complex component 3                                    | ns                 | 2.5    | ns     |
|   |   |   | DNMT3A       | DNA (cytosine-5-)-methyltransferase 3 alpha                                       | ns                 | 2.5    | ns     |
|   |   |   | RGPD4        | RANBP2-like and GRIP domain containing 4                                          | ns                 | 2.5    | ns     |
|   |   |   | FREM1        | FRAS1 related extracellular matrix 1                                              | ns                 | 2.5    | ns     |
|   |   |   | ZNF22-AS1    | ZNF22 antisense RNA 1                                                             | 2.5                | ns     | ns     |
|   |   |   | SPDYE2B      | speedy                                                                            | ns                 | 2.5    | ns     |
|   |   |   | TKT          | transketolase                                                                     | ns                 | 2.5    | ns     |
|   |   |   | YTHDC1       | YTH domain containing 1                                                           | ns                 | 2.5    | ns     |
|   |   |   | SLC2A11      | solute carrier family 2 (facilitated glucose transporter), member 11              | ns                 | 2.5    | ns     |
|   |   |   | SPDYE2       | speedy                                                                            | ns                 | 2.5    | ns     |
|   |   |   | GINS1        | GINS complex subunit 1 (Psf1 homolog)                                             | ns                 | 2.5    | ns     |
|   |   |   | LOC100506514 | uncharacterized LOC100506514                                                      | ns                 | 2.5    | ns     |
|   |   |   | CAVIN2       | caveolae associated protein 2                                                     | 2.5                | ns     | ns     |
|   |   |   | AMOTL1       | angiomin like 1                                                                   | ns                 | 2.5    | ns     |
|   |   |   | MDM4         | MDM4, p53 regulator                                                               | ns                 | 2.4    | ns     |
|   |   |   | SMS          | spermine synthase                                                                 | ns                 | 2.4    | ns     |
|   |   |   | SMG1P2       | SMG1 pseudogene 2                                                                 | ns                 | 2.4    | ns     |
|   |   |   | LARP1B       | La ribonucleoprotein domain family, member 1B                                     | ns                 | 2.4    | ns     |
|   |   |   | AKR1B1       | aldo-keto reductase family 1, member B1 (aldose reductase)                        | ns                 | 2.4    | ns     |
|   |   |   | SMG1P3       | SMG1 pseudogene 3                                                                 | ns                 | 2.4    | ns     |
|   |   |   | PAXBP1       | PAX3 and PAX7 binding protein 1                                                   | ns                 | 2.4    | ns     |
|   |   |   | LOC100128242 | uncharacterized LOC100128242                                                      | ns                 | 2.4    | ns     |
|   |   |   | PTPRK        | protein tyrosine phosphatase, receptor type, K                                    | ns                 | 2.4    | ns     |
|   |   |   | LOC401585    | uncharacterized LOC401585                                                         | ns                 | 2.4    | ns     |
|   |   |   | HMGN2        | high mobility group nucleosomal binding domain 2                                  | ns                 | 2.4    | ns     |
|   |   |   | GLI3         | GLI family zinc finger 3                                                          | ns                 | 2.4    | ns     |
|   |   |   | TAF4B        | TAF4b RNA polymerase II, TATA box binding protein (TBP)-associated factor, 105kDa | ns                 | 2.4    | ns     |
|   |   |   | NR2F1-AS1    | NR2F1 antisense RNA 1                                                             | 2.4                | ns     | ns     |
|   |   |   | DIAPH2-AS1   | DIAPH2 antisense RNA 1                                                            | ns                 | 2.4    | ns     |
|   |   |   | TCAM1P       | testicular cell adhesion molecule 1, pseudogene                                   | ns                 | 2.4    | ns     |
|   |   |   | KCTD1        | potassium channel tetramerization domain containing 1                             | ns                 | 2.4    | ns     |
|   |   |   | EXTL2        | exostosin-like glycosyltransferase 2                                              | ns                 | 2.4    | ns     |
|   |   |   | LOC105379272 | putative ankyrin repeat domain-containing protein 20A12 pseudogene                | ns                 | 2.4    | ns     |
|   |   |   | KLHL5        | kelch-like family member 5                                                        | ns                 | 2.4    | ns     |
|   |   |   | HSPBAP1      | HSPB (heat shock 27kDa) associated protein 1                                      | ns                 | 2.4    | ns     |
|   |   |   | SNORD51      | small nucleolar RNA, C                                                            | ns                 | 2.4    | ns     |
|   |   |   | LOC113230    | uncharacterized protein LOC113230                                                 | ns                 | 2.4    | ns     |
|   |   |   | CBX5         | chromobox homolog 5                                                               | ns                 | 2.4    | ns     |
|   |   |   | LINC01004    | long intergenic non-protein coding RNA 1004                                       | ns                 | 2.4    | ns     |
|   |   |   | HEXIM1       | hexamethylene bis-acetamide inducible 1                                           | ns                 | 2.4    | ns     |
|   |   |   | C4orf19      | chromosome 4 open reading frame 19                                                | ns                 | 2.4    | ns     |
|   |   |   | ZNF507       | zinc finger protein 507                                                           | ns                 | 2.4    | ns     |
|   |   |   | ENTPD1       | ectonucleoside triphosphate diphosphohydrolase 1                                  | 2.4                | ns     | ns     |
|   |   |   | CENATAC      | centrosomal AT-AC splicing factor                                                 | ns                 | 2.4    | ns     |
|   |   |   | MYO9A        | myosin IXA                                                                        | ns                 | 2.4    | ns     |
|   |   |   | SPAG5        | sperm associated antigen 5                                                        | ns                 | 2.4    | ns     |
|   |   |   | HOPX         | HOP homeobox                                                                      | ns                 | 2.4    | ns     |
|   |   |   | STOM         | stomatin                                                                          | 2.4                | ns     | ns     |



| S | C | E | Symbol       | Name                                                                                  | Linear Fold Change |        |        |
|---|---|---|--------------|---------------------------------------------------------------------------------------|--------------------|--------|--------|
|   |   |   |              |                                                                                       | S vs C             | S vs E | E vs C |
|   |   |   | TBX4         | T-box 4                                                                               | ns                 | 2.4    | ns     |
|   |   |   | SPECC1L      | sperm antigen with calponin homology and coiled-coil domains 1-like                   | ns                 | 2.4    | ns     |
|   |   |   | MGST3        | microsomal glutathione S-transferase 3                                                | ns                 | 2.4    | ns     |
|   |   |   | LOC553103    | uncharacterized LOC553103                                                             | ns                 | 2.4    | ns     |
|   |   |   | LOC400655    | uncharacterized LOC400655                                                             | ns                 | 2.4    | ns     |
|   |   |   | FER1L4       | fer-1-like family member 4, pseudogene (functional)                                   | ns                 | 2.4    | ns     |
|   |   |   | MED13        | mediator complex subunit 13                                                           | ns                 | 2.4    | ns     |
|   |   |   | LOC105379520 | uncharacterized LOC105379520                                                          | ns                 | 2.4    | ns     |
|   |   |   | NRF1         | nuclear respiratory factor 1                                                          | ns                 | 2.4    | ns     |
|   |   |   | GCNT2        | glucosaminyl (N-acetyl) transferase 2, I-branching enzyme (I blood group)             | ns                 | 2.4    | ns     |
|   |   |   | MTMR7        | myotubularin related protein 7                                                        | ns                 | 2.4    | ns     |
|   |   |   | TLCD5        | TLC domain containing 5                                                               | ns                 | 2.4    | ns     |
|   |   |   | LOC101927391 | uncharacterized LOC101927391                                                          | ns                 | 2.4    | ns     |
|   |   |   | SIRPA        | signal-regulatory protein alpha                                                       | 2.4                | ns     | ns     |
|   |   |   | TP53TG3D     | TP53 target 3D                                                                        | ns                 | 2.4    | ns     |
|   |   |   | EXOC2        | exocyst complex component 2                                                           | ns                 | 2.4    | ns     |
|   |   |   | JAM3         | junctional adhesion molecule 3                                                        | ns                 | 2.4    | ns     |
|   |   |   | N4BP2        | NEDD4 binding protein 2                                                               | ns                 | 2.4    | ns     |
|   |   |   | RANBP17      | RAN binding protein 17                                                                | ns                 | 2.4    | ns     |
|   |   |   | CPEB4        | cytoplasmic polyadenylation element binding protein 4                                 | 2.4                | ns     | ns     |
|   |   |   | SMG1P5       | SMG1 pseudogene 5                                                                     | ns                 | 2.4    | ns     |
|   |   |   | MVB12B       | multivesicular body subunit 12B                                                       | ns                 | 2.4    | ns     |
|   |   |   | CEP68        | centrosomal protein 68kDa                                                             | ns                 | 2.4    | ns     |
|   |   |   | BAZ2B        | bromodomain adjacent to zinc finger domain 2B                                         | ns                 | 2.4    | ns     |
|   |   |   | AHCYL2       | adenosylhomocysteinase-like 2                                                         | ns                 | 2.4    | ns     |
|   |   |   | MFSD2A       | major facilitator superfamily domain containing 2A                                    | ns                 | 2.4    | ns     |
|   |   |   | FDFT1        | farnesyl-diphosphate farnesyltransferase 1                                            | ns                 | 2.3    | ns     |
|   |   |   | PLEKHA7      | pleckstrin homology domain containing, family A member 7                              | ns                 | 2.3    | ns     |
|   |   |   | GABARAPL1    | GABA(A) receptor-associated protein like 1                                            | ns                 | 2.3    | ns     |
|   |   |   | HID1         | HID1 domain containing                                                                | ns                 | 2.3    | ns     |
|   |   |   | DDB1         | damage-specific DNA binding protein 1                                                 | ns                 | 2.3    | ns     |
|   |   |   | FAM135A      | family with sequence similarity 135, member A                                         | 2.3                | ns     | ns     |
|   |   |   | TSL          | testis-expressed, seven-twelve, leukemia                                              | ns                 | 2.3    | ns     |
|   |   |   | PAK6         | p21 protein (Cdc42                                                                    | ns                 | 2.3    | ns     |
|   |   |   | ILDR1        | immunoglobulin-like domain containing receptor 1                                      | 2.3                | ns     | ns     |
|   |   |   | TMEM63A      | transmembrane protein 63A                                                             | ns                 | 2.3    | ns     |
|   |   |   | TULP4        | tubby like protein 4                                                                  | ns                 | 2.3    | ns     |
|   |   |   | YAP1         | Yes-associated protein 1                                                              | ns                 | 2.3    | ns     |
|   |   |   | BBOX1        | butyrobetaine (gamma), 2-oxoglutarate dioxygenase (gamma-butyrobetaine hydroxylase) 1 | ns                 | 2.3    | ns     |
|   |   |   | ZNF721       | zinc finger protein 721                                                               | ns                 | 2.3    | ns     |
|   |   |   | SH3D21       | SH3 domain containing 21                                                              | ns                 | 2.3    | ns     |
|   |   |   | CTHRC1       | collagen triple helix repeat containing 1                                             | ns                 | 2.3    | ns     |
|   |   |   | LPCAT3       | lysophosphatidylcholine acyltransferase 3                                             | ns                 | 2.3    | ns     |
|   |   |   | MIR548AL     | microRNA 548al                                                                        | ns                 | 2.3    | ns     |
|   |   |   | CENPU        | centromere protein U                                                                  | ns                 | 2.3    | ns     |
|   |   |   | LOC101059936 | uncharacterized LOC101059936                                                          | ns                 | 2.3    | ns     |
|   |   |   | LOC105374845 | uncharacterized LOC105374845                                                          | ns                 | 2.3    | ns     |
|   |   |   | ESRP2        | epithelial splicing regulatory protein 2                                              | ns                 | 2.3    | ns     |
|   |   |   | SPDYE16      | speedy                                                                                | ns                 | 2.3    | ns     |
|   |   |   | LENG8        | leukocyte receptor cluster (LRC) member 8                                             | ns                 | 2.3    | ns     |
|   |   |   | LOC100289230 | uncharacterized LOC100289230                                                          | ns                 | 2.3    | ns     |
|   |   |   | LINC01036    | long intergenic non-protein coding RNA 1036                                           | ns                 | 2.3    | ns     |
|   |   |   | TIGD2        | tigger transposable element derived 2                                                 | ns                 | 2.3    | ns     |
|   |   |   | BEX4         | brain expressed X-linked 4                                                            | ns                 | 2.3    | ns     |
|   |   |   | LSS          | lanosterol synthase (2,3-oxidosqualene-lanosterol cyclase)                            | 2.3                | ns     | ns     |

| S | C | E | Symbol       | Name                                                                 | Linear Fold Change |        |        |
|---|---|---|--------------|----------------------------------------------------------------------|--------------------|--------|--------|
|   |   |   |              |                                                                      | S vs C             | S vs E | E vs C |
|   |   |   | HP1BP3       | heterochromatin protein 1, binding protein 3                         | ns                 | 2.3    | ns     |
|   |   |   | KMT2C        | lysine (K)-specific methyltransferase 2C                             | ns                 | 2.3    | ns     |
|   |   |   | PITPNA       | phosphatidylinositol transfer protein, alpha                         | ns                 | 2.3    | ns     |
|   |   |   | NIN          | ninein (GSK3B interacting protein)                                   | ns                 | 2.3    | ns     |
|   |   |   | MCM9         | minichromosome maintenance 9 homologous recombination repair factor  | ns                 | 2.3    | ns     |
|   |   |   | DUS2         | dihydrouridine synthase 2                                            | ns                 | 2.3    | ns     |
|   |   |   | STARD13      | StAR-related lipid transfer domain containing 13                     | ns                 | 2.3    | ns     |
|   |   |   | FLVCR2       | feline leukemia virus subgroup C cellular receptor family, member 2  | ns                 | 2.3    | ns     |
|   |   |   | BRWD1        | bromodomain and WD repeat domain containing 1                        | ns                 | 2.3    | ns     |
|   |   |   | PMP22        | peripheral myelin protein 22                                         | 2.3                | ns     | ns     |
|   |   |   | RICTOR       | RPTOR independent companion of MTOR, complex 2                       | ns                 | 2.3    | ns     |
|   |   |   | WASH5P       | WAS protein family homolog 5 pseudogene                              | ns                 | 2.3    | ns     |
|   |   |   | MCM4         | minichromosome maintenance complex component 4                       | ns                 | 2.3    | ns     |
|   |   |   | SIAH2        | siah E3 ubiquitin protein ligase 2                                   | ns                 | 2.3    | ns     |
|   |   |   | LOC100506314 | uncharacterized LOC100506314                                         | ns                 | 2.3    | ns     |
|   |   |   | OMG          | oligodendrocyte myelin glycoprotein                                  | ns                 | 2.3    | ns     |
|   |   |   | NFAT5        | nuclear factor of activated T-cells 5, tonicity-responsive           | ns                 | 2.3    | ns     |
|   |   |   | ACER3        | alkaline ceramidase 3                                                | ns                 | 2.3    | ns     |
|   |   |   | BRAF         | B-Raf proto-oncogene, serine                                         | ns                 | 2.3    | ns     |
|   |   |   | GTF2IP4      | general transcription factor Iii, pseudogene 4                       | ns                 | 2.3    | ns     |
|   |   |   | TLK1         | tousled-like kinase 1                                                | ns                 | 2.3    | ns     |
|   |   |   | CSRP2        | cysteine and glycine-rich protein 2                                  | ns                 | 2.3    | ns     |
|   |   |   | PDE4DIP      | phosphodiesterase 4D interacting protein                             | ns                 | 2.2    | ns     |
|   |   |   | GTF2IP1      | general transcription factor Iii pseudogene 1                        | ns                 | 2.2    | ns     |
|   |   |   | HSPD1        | heat shock 60kDa protein 1 (chaperonin)                              | ns                 | 2.2    | ns     |
|   |   |   | RSKR         | ribosomal protein S6 kinase related                                  | ns                 | 2.2    | ns     |
|   |   |   | GDPD5        | glycerophosphodiester phosphodiesterase domain containing 5          | ns                 | 2.2    | ns     |
|   |   |   | PIR          | pirin                                                                | 2.2                | ns     | ns     |
|   |   |   | BLMH         | bleomycin hydrolase                                                  | ns                 | 2.2    | ns     |
|   |   |   | PTPN9        | protein tyrosine phosphatase, non-receptor type 9                    | 2.2                | ns     | ns     |
|   |   |   | WSB1         | WD repeat and SOCS box containing 1                                  | ns                 | 2.2    | ns     |
|   |   |   | STK3         | serine                                                               | ns                 | 2.2    | ns     |
|   |   |   | SIPA1L1      | signal-induced proliferation-associated 1 like 1                     | ns                 | 2.2    | ns     |
|   |   |   | LOC102723575 | uncharacterized LOC102723575                                         | ns                 | 2.2    | ns     |
|   |   |   | TMEM168      | transmembrane protein 168                                            | ns                 | 2.2    | ns     |
|   |   |   | LINC00885    | long intergenic non-protein coding RNA 885                           | ns                 | 2.2    | ns     |
|   |   |   | PELI1        | pellino E3 ubiquitin protein ligase 1                                | 2.2                | ns     | ns     |
|   |   |   | SLC35B4      | solute carrier family 35 (UDP-xylose                                 | ns                 | 2.2    | ns     |
|   |   |   | CPT2         | camitine palmitoyltransferase 2                                      | ns                 | 2.2    | ns     |
|   |   |   | MYORG        | myogenesis regulating glycosidase (putative)                         | ns                 | 2.2    | ns     |
|   |   |   | DIPK2A       | divergent protein kinase domain 2A                                   | ns                 | 2.2    | ns     |
|   |   |   | TMEM139      | transmembrane protein 139                                            | ns                 | 2.2    | ns     |
|   |   |   | ARL4A        | ADP-ribosylation factor like GTPase 4A                               | 2.2                | ns     | ns     |
|   |   |   | ABHD4        | abhydrolase domain containing 4                                      | 2.2                | ns     | ns     |
|   |   |   | GSR          | glutathione reductase                                                | 2.2                | ns     | ns     |
|   |   |   | CCDC171      | coiled-coil domain containing 171                                    | ns                 | 2.2    | ns     |
|   |   |   | SMARCA2      | SWI                                                                  | ns                 | 2.2    | ns     |
|   |   |   | LOC157860    | uncharacterized LOC157860                                            | ns                 | 2.2    | ns     |
|   |   |   | TOP1         | topoisomerase (DNA) I                                                | ns                 | 2.2    | ns     |
|   |   |   | LOC105374417 | uncharacterized LOC105374417                                         | ns                 | 2.2    | ns     |
|   |   |   | MCM7         | minichromosome maintenance complex component 7                       | ns                 | 2.2    | ns     |
|   |   |   | LOC105377601 | uncharacterized LOC105377601                                         | ns                 | 2.2    | ns     |
|   |   |   | ZNF468       | zinc finger protein 468                                              | ns                 | 2.2    | ns     |
|   |   |   | ASB4         | ankyrin repeat and SOCS box containing 4                             | ns                 | 2.2    | ns     |
|   |   |   | MAGI1        | membrane associated guanylate kinase, WW and PDZ domain containing 1 | 2.2                | ns     | ns     |

| S | C | E | Symbol       | Name                                                            | Linear Fold Change |        |        |
|---|---|---|--------------|-----------------------------------------------------------------|--------------------|--------|--------|
|   |   |   |              |                                                                 | S vs C             | S vs E | E vs C |
|   |   |   | EGFLAM       | EGF-like, fibronectin type III and laminin G domains            | 2.2                | ns     | ns     |
|   |   |   | COL28A1      | collagen, type XXVIII, alpha 1                                  | ns                 | 2.2    | ns     |
|   |   |   | HNRNPD       | heterogeneous nuclear ribonucleoprotein D                       | ns                 | 2.2    | ns     |
|   |   |   | TAPT1        | transmembrane anterior posterior transformation 1               | ns                 | 2.2    | ns     |
|   |   |   | OGDH         | oxoglutarate (alpha-ketoglutarate) dehydrogenase (lipoamide)    | ns                 | 2.2    | ns     |
|   |   |   | TCAF1        | TRPM8 channel-associated factor 1                               | 2.2                | ns     | ns     |
|   |   |   | LRATD1       | LRAT domain containing 1                                        | ns                 | 2.2    | ns     |
|   |   |   | NIBAN2       | niban apoptosis regulator 2                                     | ns                 | 2.2    | ns     |
|   |   |   | ACO1         | aconitase 1, soluble                                            | 2.2                | ns     | ns     |
|   |   |   | TEAD3        | TEA domain family member 3                                      | ns                 | 2.2    | ns     |
|   |   |   | ZNF587B      | zinc finger protein 587B                                        | ns                 | 2.2    | ns     |
|   |   |   | FUCA1        | fucosidase, alpha-L- 1, tissue                                  | 2.2                | ns     | ns     |
|   |   |   | SNRK         | SNF related kinase                                              | 2.2                | ns     | ns     |
|   |   |   | ERG          | v-ets avian erythroblastosis virus E26 oncogene homolog         | 2.2                | ns     | ns     |
|   |   |   | RDX          | radixin                                                         | ns                 | 2.2    | ns     |
|   |   |   | LOC105375137 | uncharacterized LOC105375137                                    | ns                 | 2.2    | ns     |
|   |   |   | HMGB2        | high mobility group box 2                                       | ns                 | 2.2    | ns     |
|   |   |   | SNX27        | sorting nexin family member 27                                  | ns                 | 2.2    | ns     |
|   |   |   | EMP2         | epithelial membrane protein 2                                   | 2.2                | ns     | ns     |
|   |   |   | TARID        | TCF21 antisense RNA inducing promoter demethylation             | ns                 | 2.2    | ns     |
|   |   |   | RMC1         | regulator of MON1-CCZ1                                          | ns                 | 2.2    | ns     |
|   |   |   | MXD1         | MAX dimerization protein 1                                      | ns                 | 2.2    | ns     |
|   |   |   | CCND2        | cyclin D2                                                       | 2.2                | ns     | ns     |
|   |   |   | LINC00894    | long intergenic non-protein coding RNA 894                      | ns                 | 2.2    | ns     |
|   |   |   | PSMD11       | proteasome 26S subunit, non-ATPase 11                           | ns                 | 2.2    | ns     |
|   |   |   | MIR551B      | microRNA 551b                                                   | ns                 | 2.2    | ns     |
|   |   |   | SLC40A1      | solute carrier family 40 (iron-regulated transporter), member 1 | 2.2                | ns     | ns     |
|   |   |   | ETFA         | electron-transfer-flavoprotein, alpha polypeptide               | ns                 | 2.2    | ns     |
|   |   |   | SCML1        | sex comb on midleg-like 1 (Drosophila)                          | 2.1                | ns     | ns     |
|   |   |   | SRSF4        | serine                                                          | ns                 | 2.1    | ns     |
|   |   |   | PRKG1        | protein kinase, cGMP-dependent, type I                          | 2.1                | ns     | ns     |
|   |   |   | NT5DC3       | 5-nucleotidase domain containing 3                              | ns                 | 2.1    | ns     |
|   |   |   | ANKRD10      | ankyrin repeat domain 10                                        | ns                 | 2.1    | ns     |
|   |   |   | SLC16A4      | solute carrier family 16, member 4                              | ns                 | 2.1    | ns     |
|   |   |   | LINC01347    | long intergenic non-protein coding RNA 1347                     | ns                 | 2.1    | ns     |
|   |   |   | ALAS1        | 5-aminolevulinic acid synthase 1                                | ns                 | 2.1    | ns     |
|   |   |   | AAK1         | AP2 associated kinase 1                                         | ns                 | 2.1    | ns     |
|   |   |   | NOX5         | NADPH oxidase, EF-hand calcium binding domain 5                 | ns                 | 2.1    | ns     |
|   |   |   | CNOT6L       | CCR4-NOT transcription complex subunit 6-like                   | ns                 | 2.1    | ns     |
|   |   |   | SETD5        | SET domain containing 5                                         | ns                 | 2.1    | ns     |
|   |   |   | LOC100132287 | uncharacterized LOC100132287                                    | ns                 | 2.1    | ns     |
|   |   |   | PDE4B        | phosphodiesterase 4B, cAMP-specific                             | 2.1                | ns     | ns     |
|   |   |   | HES1         | hes family bHLH transcription factor 1                          | ns                 | 2.1    | ns     |
|   |   |   | NUDT3        | nudix hydrolase 3                                               | 2.1                | ns     | ns     |
|   |   |   | AMBRA1       | autophagy                                                       | ns                 | 2.1    | ns     |
|   |   |   | TAS2R60      | taste receptor, type 2, member 60                               | ns                 | 2.1    | ns     |
|   |   |   | TGFBR3       | transforming growth factor beta receptor III                    | ns                 | 2.1    | ns     |
|   |   |   | C1QTNF1-AS1  | C1QTNF1 antisense RNA 1                                         | ns                 | 2.1    | ns     |
|   |   |   | GRAMD2B      | GRAM domain containing 2B                                       | ns                 | 2.1    | ns     |
|   |   |   | FXN          | frataxin                                                        | 2.1                | ns     | ns     |
|   |   |   | DEDD         | death effector domain containing                                | ns                 | 2.1    | ns     |
|   |   |   | AGAP1        | ArfGAP with GTPase domain, ankyrin repeat and PH domain 1       | ns                 | 2.1    | ns     |
|   |   |   | ZNF552       | zinc finger protein 552                                         | ns                 | 2.1    | ns     |
|   |   |   | MAP3K20      | mitogen-activated protein kinase kinase kinase 20               | 2.1                | ns     | ns     |
|   |   |   | FAM151B      | family with sequence similarity 151, member B                   | ns                 | 2.1    | ns     |

| S | C | E | Symbol       | Name                                                                                         | Linear Fold Change |        |        |
|---|---|---|--------------|----------------------------------------------------------------------------------------------|--------------------|--------|--------|
|   |   |   |              |                                                                                              | S vs C             | S vs E | E vs C |
|   |   |   | KLHL42       | kelch-like family member 42                                                                  | ns                 | 2.1    | ns     |
|   |   |   | NASP         | nuclear autoantigenic sperm protein (histone-binding)                                        | ns                 | 2.1    | ns     |
|   |   |   | CBWD5        | COBW domain containing 5                                                                     | ns                 | 2.1    | ns     |
|   |   |   | CPT1A        | camitine palmitoyltransferase 1A (liver)                                                     | 2.1                | ns     | ns     |
|   |   |   | PTPN1        | protein tyrosine phosphatase, non-receptor type 1                                            | 2.1                | ns     | ns     |
|   |   |   | VSTM4        | V-set and transmembrane domain containing 4                                                  | 2.1                | ns     | ns     |
|   |   |   | EPB41L3      | erythrocyte membrane protein band 4.1-like 3                                                 | 2.1                | ns     | ns     |
|   |   |   | MAP4K3       | mitogen-activated protein kinase kinase kinase kinase 3                                      | ns                 | 2.1    | ns     |
|   |   |   | SQSTM1       | sequestosome 1                                                                               | ns                 | 2.1    | ns     |
|   |   |   | MYO5B        | myosin VB                                                                                    | ns                 | 2.1    | ns     |
|   |   |   | TRA2B        | transformer 2 beta homolog (Drosophila)                                                      | ns                 | 2.1    | ns     |
|   |   |   | PSD3         | pleckstrin and Sec7 domain containing 3                                                      | 2.1                | ns     | ns     |
|   |   |   | LOC100506504 | uncharacterized LOC100506504                                                                 | ns                 | 2.1    | ns     |
|   |   |   | LRRC42       | leucine rich repeat containing 42                                                            | ns                 | 2.1    | ns     |
|   |   |   | NSG1         | neuron specific gene family member 1                                                         | ns                 | 2.1    | ns     |
|   |   |   | PGAP2        | post-GPI attachment to proteins 2                                                            | ns                 | 2.1    | ns     |
|   |   |   | NPIPA5       | nuclear pore complex interacting protein family, member A5                                   | ns                 | 2.1    | ns     |
|   |   |   | MARVELD2     | MARVEL domain containing 2                                                                   | ns                 | 2.1    | ns     |
|   |   |   | NUP58        | nucleoporin 58kDa                                                                            | ns                 | 2.1    | ns     |
|   |   |   | HNRNPH1      | heterogeneous nuclear ribonucleoprotein H1 (H)                                               | ns                 | 2.1    | ns     |
|   |   |   | MCM8         | minichromosome maintenance 8 homologous recombination repair factor                          | ns                 | 2.1    | ns     |
|   |   |   | PCDH1        | protocadherin 1                                                                              | ns                 | 2.1    | ns     |
|   |   |   | SLC19A1      | solute carrier family 19 (folate transporter), member 1                                      | ns                 | 2.1    | ns     |
|   |   |   | C1orf21      | chromosome 1 open reading frame 21                                                           | ns                 | 2.1    | ns     |
|   |   |   | EPS8L1       | EPS8-like 1                                                                                  | ns                 | 2.1    | ns     |
|   |   |   | CHD2         | chromodomain helicase DNA binding protein 2                                                  | ns                 | 2.1    | ns     |
|   |   |   | HMGN1        | high mobility group nucleosome binding domain 1                                              | ns                 | 2.1    | ns     |
|   |   |   | LCOR         | ligand dependent nuclear receptor corepressor                                                | ns                 | 2.1    | ns     |
|   |   |   | NF1          | neurofibromin 1                                                                              | ns                 | 2.1    | ns     |
|   |   |   | STRA6        | stimulated by retinoic acid 6                                                                | ns                 | 2.1    | ns     |
|   |   |   | HMGCS2       | 3-hydroxy-3-methylglutaryl-CoA synthase 2 (mitochondrial)                                    | ns                 | 2.1    | ns     |
|   |   |   | FGFR2        | fibroblast growth factor receptor 2                                                          | ns                 | 2.1    | ns     |
|   |   |   | KIRREL1      | kirre like nephrin family adhesion molecule 1                                                | 2.1                | ns     | ns     |
|   |   |   | MED12        | mediator complex subunit 12                                                                  | ns                 | 2.1    | ns     |
|   |   |   | ANKRD44-IT1  | ANKRD44 intronic transcript 1                                                                | 2.1                | ns     | ns     |
|   |   |   | LOC105376363 | uncharacterized LOC105376363                                                                 | ns                 | 2.1    | ns     |
|   |   |   | NXF1         | nuclear RNA export factor 1                                                                  | ns                 | 2.0    | ns     |
|   |   |   | TNPO1        | transportin 1                                                                                | ns                 | 2.0    | ns     |
|   |   |   | LRP5         | LDL receptor related protein 5                                                               | ns                 | 2.0    | ns     |
|   |   |   | TCTEX1D4     | Tctex1 domain containing 4                                                                   | ns                 | 2.0    | ns     |
|   |   |   | FAN1         | FANCD2                                                                                       | ns                 | 2.0    | ns     |
|   |   |   | LOC100288911 | uncharacterized LOC100288911                                                                 | ns                 | 2.0    | ns     |
|   |   |   | ABI2         | abl-interactor 2                                                                             | 2.0                | ns     | ns     |
|   |   |   | MANSC1       | MANSC domain containing 1                                                                    | 2.0                | ns     | ns     |
|   |   |   | HPDL         | 4-hydroxyphenylpyruvate dioxygenase-like                                                     | ns                 | 2.0    | ns     |
|   |   |   | APBB2        | amyloid beta (A4) precursor protein-binding, family B, member 2                              | 2.0                | ns     | ns     |
|   |   |   | PLEKHA8      | pleckstrin homology domain containing, family A (phosphoinositide binding specific) member 8 | ns                 | 2.0    | ns     |
|   |   |   | SCARNA7      | small Cajal body-specific RNA 7                                                              | ns                 | 2.0    | ns     |
|   |   |   | EP300-AS1    | EP300 antisense RNA 1                                                                        | ns                 | 2.0    | ns     |
|   |   |   | RASAL2       | RAS protein activator like 2                                                                 | ns                 | 2.0    | ns     |
|   |   |   | HMGA1        | high mobility group AT-hook 1                                                                | ns                 | 2.0    | ns     |
|   |   |   | NPIPA7       | nuclear pore complex interacting protein family, member A7                                   | ns                 | 2.0    | ns     |
|   |   |   | ARID2        | AT rich interactive domain 2 (ARID, RFX-like)                                                | ns                 | 2.0    | ns     |
|   |   |   | RBM39        | RNA binding motif protein 39                                                                 | ns                 | 2.0    | ns     |
|   |   |   | SFPQ         | splicing factor proline                                                                      | ns                 | 2.0    | ns     |



| S | C | E | Symbol       | Name                                                                      | Linear Fold Change |        |        |
|---|---|---|--------------|---------------------------------------------------------------------------|--------------------|--------|--------|
|   |   |   |              |                                                                           | S vs C             | S vs E | E vs C |
|   |   |   | LYPD6        | LY6                                                                       | 2.0                | ns     | ns     |
|   |   |   | EXOC6B       | exocyst complex component 6B                                              | ns                 | 2.0    | ns     |
|   |   |   | DLG3         | discs, large homolog 3 (Drosophila)                                       | ns                 | 2.0    | ns     |
|   |   |   | NEB          | nebulin                                                                   | ns                 | 2.0    | ns     |
|   |   |   | AGFG1        | ArfGAP with FG repeats 1                                                  | ns                 | 2.0    | ns     |
|   |   |   | MOCS2        | molybdenum cofactor synthesis 2                                           | 2.0                | ns     | ns     |
|   |   |   | CASP3        | caspase 3                                                                 | ns                 | 2.0    | ns     |
|   |   |   | LOC105370489 | uncharacterized LOC105370489                                              | ns                 | 2.0    | ns     |
|   |   |   | KPNA2        | karyopherin alpha 2 (RAG cohort 1, importin alpha 1)                      | ns                 | 2.0    | ns     |
|   |   |   | HFE          | hemochromatosis                                                           | 2.0                | ns     | ns     |
|   |   |   | CSTF2        | cleavage stimulation factor, 3 pre-RNA, subunit 2                         | ns                 | 2.0    | ns     |
|   |   |   | LEP          | leptin                                                                    | -19.5              | ns     | ns     |
|   |   |   | OR5P2        | olfactory receptor, family 5, subfamily P, member 2                       | ns                 | ns     | -16.6  |
|   |   |   | LOC105375837 | uncharacterized LOC105375837                                              | -12.4              | ns     | ns     |
|   |   |   | LOC283299    | uncharacterized LOC283299                                                 | ns                 | ns     | -7.0   |
|   |   |   | UCA1         | urothelial cancer associated 1 (non-protein coding)                       | -6.4               | ns     | ns     |
|   |   |   | LAMB4        | laminin, beta 4                                                           | ns                 | ns     | -6.4   |
|   |   |   | AADACL2-AS1  | AADACL2 antisense RNA 1                                                   | ns                 | ns     | -5.8   |
|   |   |   | ZFP42        | ZFP42 zinc finger protein                                                 | -5.5               | ns     | ns     |
|   |   |   | SLC17A8      | solute carrier family 17 (vesicular glutamate transporter), member 8      | -5.5               | ns     | ns     |
|   |   |   | CA2          | carbonic anhydrase II                                                     | -5.4               | ns     | ns     |
|   |   |   | PPP4R4       | protein phosphatase 4, regulatory subunit 4                               | -5.0               | ns     | ns     |
|   |   |   | DOCK5        | dedicator of cytokinesis 5                                                | -5.0               | ns     | ns     |
|   |   |   | ZNF300P1     | zinc finger protein 300 pseudogene 1 (functional)                         | -4.9               | ns     | ns     |
|   |   |   | LOC105370445 | uncharacterized LOC105370445                                              | -4.7               | ns     | ns     |
|   |   |   | PLPP2        | phospholipid phosphatase 2                                                | -4.7               | ns     | ns     |
|   |   |   | ARSK         | arylsulfatase family, member K                                            | -4.5               | ns     | ns     |
|   |   |   | CNTNAP3      | contactin associated protein-like 3                                       | -4.4               | ns     | ns     |
|   |   |   | FOS          | FBJ murine osteosarcoma viral oncogene homolog                            | -4.3               | ns     | ns     |
|   |   |   | LOC101927857 | uncharacterized LOC101927857                                              | ns                 | ns     | -4.3   |
|   |   |   | LOC102724484 | uncharacterized LOC102724484                                              | ns                 | ns     | -4.2   |
|   |   |   | LY6E         | lymphocyte antigen 6 complex, locus E                                     | -4.1               | ns     | ns     |
|   |   |   | LOC100128979 | uncharacterized LOC100128979                                              | -4.0               | ns     | ns     |
|   |   |   | HRAT17       | heart tissue-associated transcript 17                                     | -4.0               | ns     | ns     |
|   |   |   | SFRP1        | secreted frizzled-related protein 1                                       | -4.0               | ns     | ns     |
|   |   |   | BHLHE40      | basic helix-loop-helix family, member e40                                 | -4.0               | ns     | ns     |
|   |   |   | TTK          | TTK protein kinase                                                        | ns                 | ns     | -3.9   |
|   |   |   | NUAK2        | NUAK family, SNF1-like kinase, 2                                          | -3.9               | ns     | ns     |
|   |   |   | BAIAP2L1     | BAI1-associated protein 2-like 1                                          | -3.8               | ns     | ns     |
|   |   |   | LOC105372290 | uncharacterized LOC105372290                                              | -3.8               | ns     | ns     |
|   |   |   | OR5E1P       | olfactory receptor, family 5, subfamily E, member 1 pseudogene            | ns                 | ns     | -3.7   |
|   |   |   | PRSS8        | protease, serine, 8                                                       | -3.7               | ns     | ns     |
|   |   |   | HCAR3        | hydroxycarboxylic acid receptor 3                                         | -3.7               | ns     | ns     |
|   |   |   | SNORA3B      | small nucleolar RNA, H                                                    | ns                 | ns     | -3.7   |
|   |   |   | LINC00294    | long intergenic non-protein coding RNA 294                                | -3.7               | ns     | ns     |
|   |   |   | EGLN3        | egl-9 family hypoxia-inducible factor 3                                   | -3.7               | ns     | ns     |
|   |   |   | PGPEP1       | pyroglutamyl-peptidase I                                                  | -3.6               | ns     | ns     |
|   |   |   | SASH1        | SAM and SH3 domain containing 1                                           | -3.6               | ns     | ns     |
|   |   |   | TET3         | tet methylcytosine dioxygenase 3                                          | -3.6               | ns     | ns     |
|   |   |   | SLC35A3      | solute carrier family 35 (UDP-N-acetylglucosamine transporter), member A3 | -3.5               | ns     | ns     |
|   |   |   | LINC00842    | long intergenic non-protein coding RNA 842                                | -3.5               | ns     | ns     |
|   |   |   | LOC102723446 | uncharacterized LOC102723446                                              | -3.5               | ns     | ns     |
|   |   |   | F11R         | F11 receptor                                                              | -3.5               | ns     | ns     |
|   |   |   | NOS2         | nitric oxide synthase 2, inducible                                        | -3.5               | ns     | ns     |
|   |   |   | COL21A1      | collagen, type XXI, alpha 1                                               | ns                 | ns     | -3.5   |



| S | C | E | Symbol       | Name                                                                                         | Linear Fold Change |        |        |
|---|---|---|--------------|----------------------------------------------------------------------------------------------|--------------------|--------|--------|
|   |   |   |              |                                                                                              | S vs C             | S vs E | E vs C |
|   |   |   | ACKR2        | atypical chemokine receptor 2                                                                | ns                 | ns     | -3.5   |
|   |   |   | SLC7A1       | solute carrier family 7 (cationic amino acid transporter, y+ system), member 1               | -3.4               | ns     | ns     |
|   |   |   | LOC105379109 | uncharacterized LOC105379109                                                                 | ns                 | ns     | -3.4   |
|   |   |   | MIG7         | mig-7                                                                                        | ns                 | ns     | -3.4   |
|   |   |   | TGFB1        | transforming growth factor beta 1                                                            | -3.4               | ns     | ns     |
|   |   |   | ANKRD50      | ankyrin repeat domain 50                                                                     | -3.3               | ns     | ns     |
|   |   |   | DDX60L       | DEAD (Asp-Glu-Ala-Asp) box polypeptide 60-like                                               | -3.3               | ns     | ns     |
|   |   |   | FLT1         | fms-related tyrosine kinase 1                                                                | -3.3               | ns     | ns     |
|   |   |   | ZNF726       | zinc finger protein 726                                                                      | ns                 | ns     | -3.3   |
|   |   |   | ADGRL3       | adhesion G protein-coupled receptor L3                                                       | ns                 | ns     | -3.3   |
|   |   |   | LOC101927087 | uncharacterized LOC101927087                                                                 | -3.3               | ns     | ns     |
|   |   |   | PLEKHA2      | pleckstrin homology domain containing, family A (phosphoinositide binding specific) member 2 | -3.2               | ns     | ns     |
|   |   |   | MAN2A1       | mannosidase, alpha, class 2A, member 1                                                       | -3.2               | ns     | ns     |
|   |   |   | BIRC7        | baculoviral IAP repeat containing 7                                                          | -3.2               | ns     | ns     |
|   |   |   | DSC2         | desmocollin 2                                                                                | ns                 | ns     | -3.2   |
|   |   |   | SLC1A6       | solute carrier family 1 (high affinity aspartate                                             | -3.1               | ns     | ns     |
|   |   |   | CYP8B1       | cytochrome P450, family 8, subfamily B, polypeptide 1                                        | ns                 | ns     | -3.1   |
|   |   |   | IGLJ2        | immunoglobulin lambda joining 2                                                              | ns                 | ns     | -3.1   |
|   |   |   | RUSC2        | RUN and SH3 domain containing 2                                                              | -3.1               | ns     | ns     |
|   |   |   | GJA5         | gap junction protein alpha 5                                                                 | -3.1               | ns     | ns     |
|   |   |   | LOC101928955 | uncharacterized LOC101928955                                                                 | -3.0               | ns     | ns     |
|   |   |   | FBXO46       | F-box protein 46                                                                             | -3.0               | ns     | ns     |
|   |   |   | LOC105376713 | uncharacterized LOC105376713                                                                 | ns                 | ns     | -3.0   |
|   |   |   | PANX1        | pannexin 1                                                                                   | -3.0               | ns     | ns     |
|   |   |   | TEAD1        | TEA domain family member 1 (SV40 transcriptional enhancer factor)                            | -3.0               | ns     | ns     |
|   |   |   | ELF4         | E74-like factor 4 (ets domain transcription factor)                                          | -2.9               | ns     | ns     |
|   |   |   | POTEG        | POTE ankyrin domain family, member G                                                         | -2.9               | ns     | ns     |
|   |   |   | PFKP         | phosphofructokinase, platelet                                                                | -2.9               | ns     | ns     |
|   |   |   | SH3BP5       | SH3-domain binding protein 5 (BTK-associated)                                                | -2.9               | ns     | ns     |
|   |   |   | SLC6A8       | solute carrier family 6 (neurotransmitter transporter), member 8                             | -2.9               | ns     | ns     |
|   |   |   | TCP11L1      | t-complex 11, testis-specific-like 1                                                         | -2.9               | ns     | ns     |
|   |   |   | C18orf54     | chromosome 18 open reading frame 54                                                          | ns                 | ns     | -2.9   |
|   |   |   | TCEA3        | transcription elongation factor A (SII), 3                                                   | -2.9               | ns     | ns     |
|   |   |   | SFN          | stratifin                                                                                    | -2.9               | ns     | ns     |
|   |   |   | SUGCT        | succinyl-CoA:glutarate-CoA transferase                                                       | -2.9               | ns     | ns     |
|   |   |   | LOC101929140 | uncharacterized LOC101929140                                                                 | -2.9               | ns     | ns     |
|   |   |   | SLC44A5      | solute carrier family 44, member 5                                                           | ns                 | ns     | -2.9   |
|   |   |   | RAB25        | RAB25, member RAS oncogene family                                                            | ns                 | ns     | -2.9   |
|   |   |   | TANC2        | tetratricopeptide repeat, ankyrin repeat and coiled-coil containing 2                        | -2.9               | ns     | ns     |
|   |   |   | SLC7A4       | solute carrier family 7, member 4                                                            | ns                 | ns     | -2.9   |
|   |   |   | BMT2         | base methyltransferase of 25S rRNA 2 homolog                                                 | -2.8               | ns     | ns     |
|   |   |   | IPMK         | inositol polyphosphate multikinase                                                           | -2.8               | ns     | ns     |
|   |   |   | KIF21A       | kinesin family member 21A                                                                    | -2.8               | ns     | ns     |
|   |   |   | TSC22D1      | TSC22 domain family, member 1                                                                | -2.8               | ns     | ns     |
|   |   |   | DSP          | desmoplakin                                                                                  | ns                 | ns     | -2.8   |
|   |   |   | CORO2A       | coronin, actin binding protein, 2A                                                           | -2.8               | ns     | ns     |
|   |   |   | BRIP1        | BRCA1 interacting protein C-terminal helicase 1                                              | ns                 | ns     | -2.8   |
|   |   |   | SH3PXD2A     | SH3 and PX domains 2A                                                                        | -2.8               | ns     | ns     |
|   |   |   | HYAL4        | hyaluronoglucosaminidase 4                                                                   | ns                 | ns     | -2.8   |
|   |   |   | LOC105378488 | uncharacterized LOC105378488                                                                 | -2.8               | ns     | ns     |
|   |   |   | TAF5L        | TAF5-like RNA polymerase II, p300                                                            | -2.7               | ns     | ns     |
|   |   |   | LOC105376268 | uncharacterized LOC105376268                                                                 | -2.7               | ns     | ns     |
|   |   |   | DSCR4        | Down syndrome critical region 4                                                              | ns                 | ns     | -2.7   |
|   |   |   | ERO1A        | endoplasmic reticulum oxidoreductase alpha                                                   | -2.7               | ns     | ns     |
|   |   |   | SKIL         | SKI-like proto-oncogene                                                                      | -2.7               | ns     | ns     |

| S | C | E | Symbol       | Name                                                                          | Linear Fold Change |        |        |
|---|---|---|--------------|-------------------------------------------------------------------------------|--------------------|--------|--------|
|   |   |   |              |                                                                               | S vs C             | S vs E | E vs C |
|   |   |   | LOC100505918 | uncharacterized LOC100505918                                                  | ns                 | ns     | -2.7   |
|   |   |   | LOC105370960 | uncharacterized LOC105370960                                                  | ns                 | ns     | -2.7   |
|   |   |   | COL4A1       | collagen, type IV, alpha 1                                                    | -2.7               | ns     | ns     |
|   |   |   | CDK7         | cyclin-dependent kinase 7                                                     | -2.7               | ns     | ns     |
|   |   |   | LOC101927585 | uncharacterized LOC101927585                                                  | ns                 | ns     | -2.7   |
|   |   |   | SUCNR1       | succinate receptor 1                                                          | ns                 | ns     | -2.7   |
|   |   |   | LYPD3        | LY6                                                                           | ns                 | ns     | -2.7   |
|   |   |   | LOC105376938 | uncharacterized LOC105376938                                                  | -2.7               | ns     | ns     |
|   |   |   | LOC285500    | uncharacterized LOC285500                                                     | ns                 | ns     | -2.7   |
|   |   |   | BRCA2        | breast cancer 2, early onset                                                  | ns                 | ns     | -2.7   |
|   |   |   | SOWAHD       | sosondowah ankyrin repeat domain family member D                              | -2.6               | ns     | ns     |
|   |   |   | DFFB         | DNA fragmentation factor, 40kDa, beta polypeptide (caspase-activated DNase)   | -2.6               | ns     | ns     |
|   |   |   | MME          | membrane metallo-endopeptidase                                                | ns                 | ns     | -2.6   |
|   |   |   | LOC102723985 | uncharacterized LOC102723985                                                  | ns                 | ns     | -2.6   |
|   |   |   | ZNF90        | zinc finger protein 90                                                        | ns                 | ns     | -2.6   |
|   |   |   | MFAP2        | microfibrillar associated protein 2                                           | -2.6               | ns     | ns     |
|   |   |   | MBNL2        | muscleblind-like splicing regulator 2                                         | -2.6               | ns     | ns     |
|   |   |   | LOC101927027 | uncharacterized LOC101927027                                                  | -2.6               | ns     | ns     |
|   |   |   | PRKD3        | protein kinase D3                                                             | -2.6               | ns     | ns     |
|   |   |   | SLC1A3       | solute carrier family 1 (glial high affinity glutamate transporter), member 3 | -2.6               | ns     | ns     |
|   |   |   | VAV2         | vav 2 guanine nucleotide exchange factor                                      | -2.6               | ns     | ns     |
|   |   |   | MOB3A        | MOB kinase activator 3A                                                       | -2.5               | ns     | ns     |
|   |   |   | OVOL1        | ovo-like zinc finger 1                                                        | ns                 | ns     | -2.5   |
|   |   |   | ARHGAP24     | Rho GTPase activating protein 24                                              | ns                 | ns     | -2.5   |
|   |   |   | COL4A2       | collagen, type IV, alpha 2                                                    | -2.5               | ns     | ns     |
|   |   |   | GPX3         | glutathione peroxidase 3                                                      | -2.5               | ns     | ns     |
|   |   |   | ZNF662       | zinc finger protein 662                                                       | ns                 | ns     | -2.5   |
|   |   |   | PRKAB2       | protein kinase, AMP-activated, beta 2 non-catalytic subunit                   | -2.5               | ns     | ns     |
|   |   |   | PROSER2-AS1  | PROSER2 antisense RNA 1                                                       | -2.5               | ns     | ns     |
|   |   |   | ZNF100       | zinc finger protein 100                                                       | -2.5               | ns     | ns     |
|   |   |   | MFAP5        | microfibrillar associated protein 5                                           | -2.5               | ns     | ns     |
|   |   |   | PLIN2        | perilipin 2                                                                   | ns                 | ns     | -2.5   |
|   |   |   | SLC10A7      | solute carrier family 10, member 7                                            | -2.5               | ns     | ns     |
|   |   |   | SOWAHC       | sosondowah ankyrin repeat domain family member C                              | -2.5               | ns     | ns     |
|   |   |   | HYI          | hydroxypyruvate isomerase (putative)                                          | -2.5               | ns     | ns     |
|   |   |   | PLAAT3       | phospholipase A and acyltransferase 3                                         | -2.4               | ns     | ns     |
|   |   |   | HMG3-AS1     | HMG3 antisense RNA 1                                                          | ns                 | ns     | -2.4   |
|   |   |   | PLCL2        | phospholipase C-like 2                                                        | ns                 | ns     | -2.4   |
|   |   |   | SH3BP5-AS1   | SH3BP5 antisense RNA 1                                                        | -2.4               | ns     | ns     |
|   |   |   | JPT2         | Jupiter microtubule associated homolog 2                                      | -2.4               | ns     | ns     |
|   |   |   | AP3S1        | adaptor-related protein complex 3, sigma 1 subunit                            | -2.4               | ns     | ns     |
|   |   |   | CHRD2        | chordin-like 2                                                                | -2.4               | ns     | ns     |
|   |   |   | SCAMP1       | secretory carrier membrane protein 1                                          | -2.4               | ns     | ns     |
|   |   |   | TK1          | thymidine kinase 1, soluble                                                   | ns                 | ns     | -2.4   |
|   |   |   | CCSER1       | coiled-coil serine rich protein 1                                             | ns                 | ns     | -2.4   |
|   |   |   | NDST1        | N-deacetylase                                                                 | -2.4               | ns     | ns     |
|   |   |   | PTH1R        | parathyroid hormone 1 receptor                                                | -2.4               | ns     | ns     |
|   |   |   | ACTA1        | actin, alpha 1, skeletal muscle                                               | -2.4               | ns     | ns     |
|   |   |   | PPP1R1C      | protein phosphatase 1, regulatory (inhibitor) subunit 1C                      | -2.4               | ns     | ns     |
|   |   |   | ZBTB2        | zinc finger and BTB domain containing 2                                       | -2.4               | ns     | ns     |
|   |   |   | TLE1         | transducin-like enhancer of split 1 (E(sp1) homolog, Drosophila)              | ns                 | ns     | -2.4   |
|   |   |   | CCNG2        | cyclin G2                                                                     | -2.4               | ns     | ns     |
|   |   |   | PARP14       | poly(ADP-ribose) polymerase family member 14                                  | -2.4               | ns     | ns     |
|   |   |   | SLC27A6      | solute carrier family 27 (fatty acid transporter), member 6                   | ns                 | ns     | -2.4   |
|   |   |   | B3GNT7       | UDP-GlcNAc:betaGal beta-1,3-N-acetylglucosaminyltransferase 7                 | -2.3               | ns     | ns     |

| S | C | E | Symbol       | Name                                                                      | Linear Fold Change |        |        |
|---|---|---|--------------|---------------------------------------------------------------------------|--------------------|--------|--------|
|   |   |   |              |                                                                           | S vs C             | S vs E | E vs C |
|   |   |   | PHKA2        | phosphorylase kinase, alpha 2 (liver)                                     | ns                 | ns     | -2.3   |
|   |   |   | ZNF93        | zinc finger protein 93                                                    | ns                 | ns     | -2.3   |
|   |   |   | CDKN1C       | cyclin-dependent kinase inhibitor 1C (p57, Kip2)                          | -2.3               | ns     | ns     |
|   |   |   | IGF2BP2      | insulin-like growth factor 2 mRNA binding protein 2                       | ns                 | ns     | -2.3   |
|   |   |   | GPR146       | G protein-coupled receptor 146                                            | -2.3               | ns     | ns     |
|   |   |   | PLEKHA5      | pleckstrin homology domain containing, family A member 5                  | ns                 | ns     | -2.3   |
|   |   |   | LMNB1        | lamin B1                                                                  | ns                 | ns     | -2.3   |
|   |   |   | BIRC5        | baculoviral IAP repeat containing 5                                       | ns                 | ns     | -2.3   |
|   |   |   | BZW2         | basic leucine zipper and W2 domains 2                                     | ns                 | ns     | -2.3   |
|   |   |   | MARVELD1     | MARVEL domain containing 1                                                | -2.3               | ns     | ns     |
|   |   |   | LRP10        | LDL receptor related protein 10                                           | -2.3               | ns     | ns     |
|   |   |   | LOC102723885 | uncharacterized LOC102723885                                              | ns                 | ns     | -2.3   |
|   |   |   | NR6A1        | nuclear receptor subfamily 6, group A, member 1                           | ns                 | ns     | -2.3   |
|   |   |   | SLC16A3      | solute carrier family 16 (monocarboxylate transporter), member 3          | -2.3               | ns     | ns     |
|   |   |   | FOXJ3        | forkhead box J3                                                           | -2.3               | ns     | ns     |
|   |   |   | RASL11B      | RAS-like, family 11, member B                                             | ns                 | ns     | -2.3   |
|   |   |   | FANCE        | Fanconi anemia complementation group E                                    | ns                 | ns     | -2.3   |
|   |   |   | LOC105373786 | uncharacterized LOC105373786                                              | ns                 | ns     | -2.3   |
|   |   |   | ESRP1        | epithelial splicing regulatory protein 1                                  | ns                 | ns     | -2.3   |
|   |   |   | RAB30        | RAB30, member RAS oncogene family                                         | ns                 | ns     | -2.2   |
|   |   |   | SLC39A11     | solute carrier family 39, member 11                                       | -2.2               | ns     | ns     |
|   |   |   | ARL5B        | ADP-ribosylation factor like GTPase 5B                                    | ns                 | ns     | -2.2   |
|   |   |   | TAGLN2       | transgelin 2                                                              | -2.2               | ns     | ns     |
|   |   |   | CYB5R1       | cytochrome b5 reductase 1                                                 | ns                 | ns     | -2.2   |
|   |   |   | DAG1         | dystroglycan 1 (dystrophin-associated glycoprotein 1)                     | ns                 | ns     | -2.2   |
|   |   |   | MORF4L2      | mortality factor 4 like 2                                                 | -2.2               | ns     | ns     |
|   |   |   | MIR205HG     | MIR205 host gene                                                          | ns                 | ns     | -2.2   |
|   |   |   | CENPJ        | centromere protein J                                                      | ns                 | ns     | -2.2   |
|   |   |   | SORT1        | sortilin 1                                                                | ns                 | ns     | -2.2   |
|   |   |   | CPVL         | carboxypeptidase, vitellogenic-like                                       | -2.2               | ns     | ns     |
|   |   |   | NDFIP2       | Nedd4 family interacting protein 2                                        | -2.2               | ns     | ns     |
|   |   |   | MYCN         | v-myc avian myelocytomatosis viral oncogene neuroblastoma derived homolog | -2.2               | ns     | ns     |
|   |   |   | ITPRID2      | ITPR interacting domain containing 2                                      | ns                 | ns     | -2.2   |
|   |   |   | FAM78A       | family with sequence similarity 78, member A                              | -2.2               | ns     | ns     |
|   |   |   | KRT18P54     | keratin 18 pseudogene 54                                                  | ns                 | ns     | -2.2   |
|   |   |   | NEK6         | NIMA-related kinase 6                                                     | -2.2               | ns     | ns     |
|   |   |   | LHX2         | LIM homeobox 2                                                            | -2.2               | ns     | ns     |
|   |   |   | CECR9        | cat eye syndrome chromosome region, candidate 9 (non-protein coding)      | -2.2               | ns     | ns     |
|   |   |   | MAPK3        | mitogen-activated protein kinase 3                                        | -2.1               | ns     | ns     |
|   |   |   | RPSAP58      | ribosomal protein SA pseudogene 58                                        | ns                 | ns     | -2.1   |
|   |   |   | NFIL3        | nuclear factor, interleukin 3 regulated                                   | -2.1               | ns     | ns     |
|   |   |   | KCNQ1OT1     | KCNQ1 opposite strand                                                     | ns                 | ns     | -2.1   |
|   |   |   | FAM120AOS    | family with sequence similarity 120A opposite strand                      | ns                 | ns     | -2.1   |
|   |   |   | LOC100131262 | uncharacterized LOC100131262                                              | -2.1               | ns     | ns     |
|   |   |   | LOC101929460 | uncharacterized LOC101929460                                              | -2.1               | ns     | ns     |
|   |   |   | NKRF         | NFKB repressing factor                                                    | -2.1               | ns     | ns     |
|   |   |   | GPR150       | G protein-coupled receptor 150                                            | -2.1               | ns     | ns     |
|   |   |   | DLK2         | delta-like 2 homolog (Drosophila)                                         | -2.1               | ns     | ns     |
|   |   |   | HACD2        | 3-hydroxyacyl-CoA dehydratase 2                                           | -2.1               | ns     | ns     |
|   |   |   | ARHGAP10     | Rho GTPase activating protein 10                                          | -2.1               | ns     | ns     |
|   |   |   | FAM83D       | family with sequence similarity 83, member D                              | ns                 | ns     | -2.1   |
|   |   |   | KNTC1        | kinetochore associated 1                                                  | ns                 | ns     | -2.1   |
|   |   |   | LOC105377606 | uncharacterized LOC105377606                                              | ns                 | ns     | -2.1   |
|   |   |   | CLDND1       | claudin domain containing 1                                               | -2.1               | ns     | ns     |
|   |   |   | EDEM2        | ER degradation enhancer, mannosidase alpha-like 2                         | -2.1               | ns     | ns     |

| S | C | E | Symbol       | Name                                                                      | Linear Fold Change |        |        |
|---|---|---|--------------|---------------------------------------------------------------------------|--------------------|--------|--------|
|   |   |   |              |                                                                           | S vs C             | S vs E | E vs C |
|   |   |   | LOC440461    | Rho GTPase activating protein 27 pseudogene                               | -2.1               | ns     | ns     |
|   |   |   | PPP3CA       | protein phosphatase 3, catalytic subunit, alpha isozyme                   | -2.1               | ns     | ns     |
|   |   |   | SLC29A3      | solute carrier family 29 (equilibrative nucleoside transporter), member 3 | ns                 | ns     | -2.1   |
|   |   |   | EIF2AK2      | eukaryotic translation initiation factor 2-alpha kinase 2                 | -2.1               | ns     | ns     |
|   |   |   | ANXA3        | annexin A3                                                                | ns                 | ns     | -2.1   |
|   |   |   | CSPP1        | centrosome and spindle pole associated protein 1                          | ns                 | ns     | -2.1   |
|   |   |   | TRIM24       | tripartite motif containing 24                                            | ns                 | ns     | -2.1   |
|   |   |   | USP6NL       | USP6 N-terminal like                                                      | ns                 | ns     | -2.1   |
|   |   |   | ACVR2B       | activin A receptor type IIB                                               | ns                 | ns     | -2.1   |
|   |   |   | ERBB3        | erb-b2 receptor tyrosine kinase 3                                         | -2.0               | ns     | ns     |
|   |   |   | PTPN4        | protein tyrosine phosphatase, non-receptor type 4 (megakaryocyte)         | -2.0               | ns     | ns     |
|   |   |   | POLI         | polymerase (DNA directed) iota                                            | ns                 | ns     | -2.0   |
|   |   |   | RSPRY1       | ring finger and SPRY domain containing 1                                  | -2.0               | ns     | ns     |
|   |   |   | PRRG1        | proline rich Gla (G-carboxyglutamic acid) 1                               | ns                 | ns     | -2.0   |
|   |   |   | SLC49A4      | solute carrier family 49 member 4                                         | ns                 | ns     | -2.0   |
|   |   |   | NEDD9        | neural precursor cell expressed, developmentally down-regulated 9         | ns                 | ns     | -2.0   |
|   |   |   | SNORA84      | small nucleolar RNA, H                                                    | -2.0               | ns     | ns     |
|   |   |   | LOXL1        | lysyl oxidase-like 1                                                      | -2.0               | ns     | ns     |
|   |   |   | GAA          | glucosidase, alpha; acid                                                  | -2.0               | ns     | ns     |
|   |   |   | ORC1         | origin recognition complex subunit 1                                      | ns                 | ns     | -2.0   |
|   |   |   | CDK17        | cyclin-dependent kinase 17                                                | -2.0               | ns     | ns     |
|   |   |   | HK2          | hexokinase 2                                                              | -2.0               | ns     | ns     |
|   |   |   | PXDC1        | PX domain containing 1                                                    | ns                 | ns     | -2.0   |
|   |   |   | KRTCAP3      | keratinocyte associated protein 3                                         | -2.0               | ns     | ns     |
|   |   |   | CXCL9        | chemokine (C-X-C motif) ligand 9                                          | ns                 | -50.7  | ns     |
|   |   |   | PAEP         | progesterone-associated endometrial protein                               | ns                 | -42.6  | ns     |
|   |   |   | OR5H14       | olfactory receptor, family 5, subfamily H, member 14                      | ns                 | -25.9  | ns     |
|   |   |   | LOC100506530 | uncharacterized LOC100506530                                              | ns                 | -16.6  | ns     |
|   |   |   | TAC3         | tachykinin 3                                                              | ns                 | -16.1  | ns     |
|   |   |   | LOC105374458 | uncharacterized LOC105374458                                              | ns                 | -15.4  | ns     |
|   |   |   | MYO16-AS1    | MYO16 antisense RNA 1                                                     | ns                 | -12.6  | ns     |
|   |   |   | KLRF1        | killer cell lectin-like receptor subfamily F, member 1                    | ns                 | -12.1  | ns     |
|   |   |   | SLAMF6       | SLAM family member 6                                                      | ns                 | -11.3  | ns     |
|   |   |   | LOC105373334 | uncharacterized LOC105373334                                              | ns                 | -10.8  | ns     |
|   |   |   | C1orf54      | chromosome 1 open reading frame 54                                        | ns                 | ns     | 9.9    |
|   |   |   | MMP3         | matrix metalloproteinase 3                                                | ns                 | -9.6   | ns     |
|   |   |   | SPINK2       | serine peptidase inhibitor, Kazal type 2 (acrosin-trypsin inhibitor)      | ns                 | -9.3   | ns     |
|   |   |   | LOC105379051 | uncharacterized LOC105379051                                              | ns                 | -9.2   | ns     |
|   |   |   | SRGN         | serglycin                                                                 | ns                 | ns     | 9.2    |
|   |   |   | KLRF2        | killer cell lectin-like receptor subfamily F, member 2                    | ns                 | -8.7   | ns     |
|   |   |   | KLRC2        | killer cell lectin-like receptor subfamily C, member 2                    | ns                 | -8.6   | ns     |
|   |   |   | C4BPA        | complement component 4 binding protein, alpha                             | ns                 | -8.6   | ns     |
|   |   |   | CAMK2D       | calcium                                                                   | ns                 | ns     | 8.0    |
|   |   |   | CYBB         | cytochrome b-245, beta polypeptide                                        | ns                 | ns     | 7.3    |
|   |   |   | CES1P1       | carboxylesterase 1 pseudogene 1                                           | ns                 | ns     | 7.0    |
|   |   |   | VCAM1        | vascular cell adhesion molecule 1                                         | ns                 | ns     | 6.9    |
|   |   |   | ANTXR1       | anthrax toxin receptor 1                                                  | ns                 | -6.8   | ns     |
|   |   |   | AADAC        | arylacetamide deacetylase                                                 | ns                 | -6.7   | ns     |
|   |   |   | GNLY         | granulysin                                                                | ns                 | -6.7   | ns     |
|   |   |   | IGFBP5       | insulin like growth factor binding protein 5                              | ns                 | ns     | 6.6    |
|   |   |   | CCL8         | chemokine (C-C motif) ligand 8                                            | ns                 | -6.4   | ns     |
|   |   |   | TM4SF5       | transmembrane 4 L six family member 5                                     | ns                 | -6.3   | ns     |
|   |   |   | MS4A4A       | membrane-spanning 4-domains, subfamily A, member 4A                       | ns                 | ns     | 6.3    |
|   |   |   | GBP4         | guanylate binding protein 4                                               | ns                 | ns     | 6.3    |
|   |   |   | MUC1         | mucin 1, cell surface associated                                          | ns                 | -6.2   | ns     |



| S | C | E | Symbol       | Name                                                                                          | Linear Fold Change |        |        |
|---|---|---|--------------|-----------------------------------------------------------------------------------------------|--------------------|--------|--------|
|   |   |   |              |                                                                                               | S vs C             | S vs E | E vs C |
|   |   |   | MMRN1        | multimerin 1                                                                                  | ns                 | ns     | 6.2    |
|   |   |   | OAS2         | 2-5-oligoadenylate synthetase 2                                                               | ns                 | -6.2   | ns     |
|   |   |   | NAPSB        | napsin B aspartic peptidase, pseudogene                                                       | ns                 | -5.6   | ns     |
|   |   |   | ENPP4        | ectonucleotide pyrophosphatase                                                                | ns                 | ns     | 6.0    |
|   |   |   | TOX          | thymocyte selection-associated high mobility group box                                        | ns                 | ns     | 5.9    |
|   |   |   | LINC01338    | long intergenic non-protein coding RNA 1338                                                   | ns                 | -5.9   | ns     |
|   |   |   | NTN4         | netrin 4                                                                                      | ns                 | -5.8   | ns     |
|   |   |   | C3AR1        | complement component 3a receptor 1                                                            | ns                 | ns     | 5.7    |
|   |   |   | CLTRN        | collectrin, amino acid transport regulator                                                    | ns                 | -5.3   | ns     |
|   |   |   | EDNRA        | endothelin receptor type A                                                                    | ns                 | ns     | 5.6    |
|   |   |   | ST3GAL5      | ST3 beta-galactoside alpha-2,3-sialyltransferase 5                                            | ns                 | -5.4   | ns     |
|   |   |   | S100A8       | S100 calcium binding protein A8                                                               | ns                 | -5.3   | ns     |
|   |   |   | CD163        | CD163 molecule                                                                                | ns                 | ns     | 5.3    |
|   |   |   | BICC1        | BicC family RNA binding protein 1                                                             | ns                 | ns     | 5.3    |
|   |   |   | LOC102724587 | uncharacterized LOC102724587                                                                  | ns                 | ns     | 5.3    |
|   |   |   | VIM-AS1      | VIM antisense RNA 1                                                                           | ns                 | ns     | 5.2    |
|   |   |   | GPR65        | G protein-coupled receptor 65                                                                 | ns                 | -4.5   | ns     |
|   |   |   | CLU          | clusterin                                                                                     | ns                 | -5.2   | ns     |
|   |   |   | TDRD6        | tudor domain containing 6                                                                     | ns                 | -5.1   | ns     |
|   |   |   | ADGRF5       | adhesion G protein-coupled receptor F5                                                        | ns                 | ns     | 5.0    |
|   |   |   | EPHB2        | EPH receptor B2                                                                               | ns                 | -5.0   | ns     |
|   |   |   | LOC105374732 | uncharacterized LOC105374732                                                                  | ns                 | -4.9   | ns     |
|   |   |   | CRIP1        | cysteine-rich protein 1 (intestinal)                                                          | ns                 | -4.9   | ns     |
|   |   |   | LOC100996713 | uncharacterized LOC100996713                                                                  | ns                 | ns     | 4.8    |
|   |   |   | SEMA5A       | semaphorin 5A                                                                                 | ns                 | -4.7   | ns     |
|   |   |   | IFIT3        | interferon-induced protein with tetratricopeptide repeats 3                                   | ns                 | -4.7   | ns     |
|   |   |   | ITGAD        | integrin alpha D                                                                              | ns                 | -4.7   | ns     |
|   |   |   | VSIG4        | V-set and immunoglobulin domain containing 4                                                  | ns                 | ns     | 4.7    |
|   |   |   | PROS1        | protein S (alpha)                                                                             | ns                 | ns     | 4.6    |
|   |   |   | F3           | coagulation factor III (thromboplastin, tissue factor)                                        | ns                 | ns     | 4.6    |
|   |   |   | PLXDC2       | plexin domain containing 2                                                                    | ns                 | -4.5   | ns     |
|   |   |   | LEFTY2       | left-right determination factor 2                                                             | ns                 | -4.5   | ns     |
|   |   |   | ECM2         | extracellular matrix protein 2, female organ and adipocyte specific                           | ns                 | -4.5   | ns     |
|   |   |   | MYL10        | myosin light chain 10                                                                         | ns                 | -4.5   | ns     |
|   |   |   | LOC101929531 | uncharacterized LOC101929531                                                                  | ns                 | -4.5   | ns     |
|   |   |   | GSTA1        | glutathione S-transferase alpha 1                                                             | ns                 | -4.4   | ns     |
|   |   |   | DAW1         | dynein assembly factor with WDR repeat domains 1                                              | ns                 | -4.4   | ns     |
|   |   |   | TTC39C       | tetratricopeptide repeat domain 39C                                                           | ns                 | -4.4   | ns     |
|   |   |   | DUSP23       | dual specificity phosphatase 23                                                               | ns                 | -4.4   | ns     |
|   |   |   | SMCO3        | single-pass membrane protein with coiled-coil domains 3                                       | ns                 | -4.4   | ns     |
|   |   |   | CD44         | CD44 molecule (Indian blood group)                                                            | ns                 | ns     | 4.3    |
|   |   |   | SLC12A2      | solute carrier family 12 (sodium                                                              | ns                 | ns     | 4.3    |
|   |   |   | MAGEH1       | MAGE family member H1                                                                         | ns                 | ns     | 4.3    |
|   |   |   | RNF125       | ring finger protein 125, E3 ubiquitin protein ligase                                          | ns                 | ns     | 4.2    |
|   |   |   | PZP          | pregnancy-zone protein                                                                        | ns                 | -4.2   | ns     |
|   |   |   | EHD2         | EH domain containing 2                                                                        | ns                 | ns     | 4.2    |
|   |   |   | CD109        | CD109 molecule                                                                                | ns                 | ns     | 4.2    |
|   |   |   | CCN2         | cellular communication network factor 2                                                       | ns                 | -4.1   | ns     |
|   |   |   | ITGA4        | integrin alpha 4                                                                              | ns                 | ns     | 4.1    |
|   |   |   | SLC9A9       | solute carrier family 9, subfamily A (NHE9, cation proton antiporter 9), member 9             | ns                 | ns     | 4.1    |
|   |   |   | KLRD1        | killer cell lectin-like receptor subfamily D, member 1                                        | ns                 | ns     | 4.0    |
|   |   |   | SERPINE1     | serpin peptidase inhibitor, clade E (nexin, plasminogen activator inhibitor type 1), member 1 | ns                 | -4.0   | ns     |
|   |   |   | CRLF1        | cytokine receptor-like factor 1                                                               | ns                 | -4.0   | ns     |
|   |   |   | PGM5-AS1     | PGM5 antisense RNA 1                                                                          | ns                 | -4.0   | ns     |
|   |   |   | PRKD1        | protein kinase D1                                                                             | ns                 | ns     | 4.0    |



| S | C | E | Symbol           | Name                                                                  | Linear Fold Change |        |        |
|---|---|---|------------------|-----------------------------------------------------------------------|--------------------|--------|--------|
|   |   |   |                  |                                                                       | S vs C             | S vs E | E vs C |
|   |   |   | IGLC2            | immunoglobulin lambda constant 2 (Kern-Oz- marker)                    | ns                 | -3.9   | ns     |
|   |   |   | TOB1             | transducer of ERBB2, 1                                                | ns                 | ns     | 3.9    |
|   |   |   | LL22NC03-104C7.1 | uncharacterized LOC105373004                                          | ns                 | -3.7   | ns     |
|   |   |   | ACSS3            | acyl-CoA synthetase short-chain family member 3                       | ns                 | ns     | 3.9    |
|   |   |   | ADGRF1           | adhesion G protein-coupled receptor F1                                | ns                 | -3.8   | ns     |
|   |   |   | KCNQ5-IT1        | KCNQ5 intronic transcript 1                                           | ns                 | -3.8   | ns     |
|   |   |   | CD69             | CD69 molecule                                                         | ns                 | -3.8   | ns     |
|   |   |   | GIMAP7           | GTPase, IMAP family member 7                                          | ns                 | ns     | 3.8    |
|   |   |   | MYH11            | myosin, heavy chain 11, smooth muscle                                 | ns                 | ns     | 3.7    |
|   |   |   | LOC102724156     | uncharacterized LOC102724156                                          | ns                 | -3.7   | ns     |
|   |   |   | SNORA47          | small nucleolar RNA, H                                                | ns                 | ns     | 3.7    |
|   |   |   | PMCH             | pro-melanin-concentrating hormone                                     | ns                 | -3.7   | ns     |
|   |   |   | MAP9             | microtubule-associated protein 9                                      | ns                 | ns     | 3.7    |
|   |   |   | GIMAP4           | GTPase, IMAP family member 4                                          | ns                 | ns     | 3.7    |
|   |   |   | LOC105377590     | uncharacterized LOC105377590                                          | ns                 | -3.7   | ns     |
|   |   |   | OAS3             | 2-5-oligoadenylate synthetase 3                                       | ns                 | -3.7   | ns     |
|   |   |   | PSENEN           | presenilin enhancer gamma secretase subunit                           | ns                 | -3.6   | ns     |
|   |   |   | PCGF5            | polycomb group ring finger 5                                          | ns                 | ns     | 3.6    |
|   |   |   | CD82             | CD82 molecule                                                         | ns                 | -3.6   | ns     |
|   |   |   | PLEK             | pleckstrin                                                            | ns                 | ns     | 3.6    |
|   |   |   | PRLR             | prolactin receptor                                                    | ns                 | ns     | 3.6    |
|   |   |   | PLA2G4A          | phospholipase A2, group IVA (cytosolic, calcium-dependent)            | ns                 | ns     | 3.6    |
|   |   |   | GASK1B           | golgi associated kinase 1B                                            | ns                 | ns     | 3.6    |
|   |   |   | XAF1             | XIAP associated factor 1                                              | ns                 | -3.6   | ns     |
|   |   |   | GPC4             | glypican 4                                                            | ns                 | -3.5   | ns     |
|   |   |   | MORN2            | MORN repeat containing 2                                              | ns                 | -3.5   | ns     |
|   |   |   | MPEG1            | macrophage expressed 1                                                | ns                 | ns     | 3.5    |
|   |   |   | ZNF675           | zinc finger protein 675                                               | ns                 | -3.5   | ns     |
|   |   |   | PODNL1           | podocan-like 1                                                        | ns                 | -3.5   | ns     |
|   |   |   | CDH11            | cadherin 11, type 2, OB-cadherin (osteoblast)                         | ns                 | ns     | 3.5    |
|   |   |   | GDAP1            | ganglioside induced differentiation associated protein 1              | ns                 | ns     | 3.5    |
|   |   |   | HSD17B6          | hydroxysteroid (17-beta) dehydrogenase 6                              | ns                 | ns     | 3.5    |
|   |   |   | DYNC2LI1         | dynein, cytoplasmic 2, light intermediate chain 1                     | ns                 | ns     | 3.5    |
|   |   |   | ITM2A            | integral membrane protein 2A                                          | ns                 | ns     | 3.5    |
|   |   |   | SLC30A4          | solute carrier family 30 (zinc transporter), member 4                 | ns                 | -3.5   | ns     |
|   |   |   | KCNA4            | potassium channel, voltage gated shaker related subfamily A, member 4 | ns                 | -3.5   | ns     |
|   |   |   | ALOX5AP          | arachidonate 5-lipoxygenase-activating protein                        | ns                 | ns     | 3.4    |
|   |   |   | EDIL3            | EGF-like repeats and discoidin I-like domains 3                       | ns                 | ns     | 3.4    |
|   |   |   | BDH2             | 3-hydroxybutyrate dehydrogenase, type 2                               | ns                 | ns     | 3.4    |
|   |   |   | CD86             | CD86 molecule                                                         | ns                 | ns     | 3.4    |
|   |   |   | RETREG1          | reticulophagy regulator 1                                             | ns                 | ns     | 3.4    |
|   |   |   | PDE8B            | phosphodiesterase 8B                                                  | ns                 | ns     | 3.4    |
|   |   |   | LOC101928919     | uncharacterized LOC101928919                                          | ns                 | -3.4   | ns     |
|   |   |   | LRRC15           | leucine rich repeat containing 15                                     | ns                 | -3.4   | ns     |
|   |   |   | KHDRBS3          | KH domain containing, RNA binding, signal transduction associated 3   | ns                 | -3.4   | ns     |
|   |   |   | TSPAN8           | tetraspanin 8                                                         | ns                 | -3.4   | ns     |
|   |   |   | ROS1             | ROS proto-oncogene 1, receptor tyrosine kinase                        | ns                 | -3.3   | ns     |
|   |   |   | TEK              | TEK tyrosine kinase, endothelial                                      | ns                 | ns     | 3.3    |
|   |   |   | FKBP5            | FK506 binding protein 5                                               | ns                 | ns     | 3.3    |
|   |   |   | PRTFDC1          | phosphoribosyl transferase domain containing 1                        | ns                 | ns     | 3.3    |
|   |   |   | HACD1            | 3-hydroxyacyl-CoA dehydratase 1                                       | ns                 | -3.3   | ns     |
|   |   |   | GADD45B          | growth arrest and DNA-damage-inducible, beta                          | ns                 | -3.3   | ns     |
|   |   |   | CHST7            | carbohydrate (N-acetylglucosamine 6-O) sulfotransferase 7             | ns                 | -3.3   | ns     |
|   |   |   | MAMDC2-AS1       | MAMDC2 antisense RNA 1                                                | ns                 | -3.3   | ns     |
|   |   |   | MAF              | v-maf avian musculoaponeurotic fibrosarcoma oncogene homolog          | ns                 | ns     | 3.3    |

| S | C | E | Symbol       | Name                                                                        | Linear Fold Change |        |        |
|---|---|---|--------------|-----------------------------------------------------------------------------|--------------------|--------|--------|
|   |   |   |              |                                                                             | S vs C             | S vs E | E vs C |
|   |   |   | RHOJ         | ras homolog family member J                                                 | ns                 | ns     | 3.3    |
|   |   |   | VIM          | vimentin                                                                    | ns                 | ns     | 3.3    |
|   |   |   | ZFAND4       | zinc finger, AN1-type domain 4                                              | ns                 | ns     | 3.3    |
|   |   |   | WDR86-AS1    | WDR86 antisense RNA 1                                                       | ns                 | -3.3   | ns     |
|   |   |   | ITPR1        | inositol 1,4,5-trisphosphate receptor, type 1                               | ns                 | ns     | 3.3    |
|   |   |   | ARRDC4       | arrestin domain containing 4                                                | ns                 | ns     | 3.3    |
|   |   |   | ATP13A3      | ATPase type 13A3                                                            | ns                 | -3.3   | ns     |
|   |   |   | MCAM         | melanoma cell adhesion molecule                                             | ns                 | -3.3   | ns     |
|   |   |   | SLC43A3      | solute carrier family 43, member 3                                          | ns                 | -3.3   | ns     |
|   |   |   | MIPOL1       | mirror-image polydactyly 1                                                  | ns                 | ns     | 3.3    |
|   |   |   | CCL5         | chemokine (C-C motif) ligand 5                                              | ns                 | -3.3   | ns     |
|   |   |   | APOC1        | apolipoprotein C-I                                                          | ns                 | -3.2   | ns     |
|   |   |   | CYP39A1      | cytochrome P450, family 39, subfamily A, polypeptide 1                      | ns                 | -3.2   | ns     |
|   |   |   | TTPAL        | tocopherol (alpha) transfer protein-like                                    | ns                 | -3.2   | ns     |
|   |   |   | STAB2        | stabilin 2                                                                  | ns                 | -3.2   | ns     |
|   |   |   | HSD17B14     | hydroxysteroid (17-beta) dehydrogenase 14                                   | ns                 | -3.2   | ns     |
|   |   |   | ZFP36        | ZFP36 ring finger protein                                                   | ns                 | -3.2   | ns     |
|   |   |   | MGAT2        | mannosyl (alpha-1,6-)-glycoprotein beta-1,2-N-acetylglucosaminyltransferase | ns                 | -3.2   | ns     |
|   |   |   | CDH13        | cadherin 13                                                                 | ns                 | ns     | 3.2    |
|   |   |   | MIR3918      | microRNA 3918                                                               | ns                 | -3.2   | ns     |
|   |   |   | PPDPF        | pancreatic progenitor cell differentiation and proliferation factor         | ns                 | -3.2   | ns     |
|   |   |   | LRP12        | LDL receptor related protein 12                                             | ns                 | ns     | 3.2    |
|   |   |   | CADPS2       | Ca <sup>++</sup> -dependent secretion activator 2                           | ns                 | ns     | 3.2    |
|   |   |   | LOC105377134 | uncharacterized LOC105377134                                                | ns                 | -3.2   | ns     |
|   |   |   | HERC6        | HECT and RLD domain containing E3 ubiquitin protein ligase family member 6  | ns                 | -3.2   | ns     |
|   |   |   | SLAMF8       | SLAM family member 8                                                        | ns                 | -3.1   | ns     |
|   |   |   | RAB32        | RAB32, member RAS oncogene family                                           | ns                 | -3.1   | ns     |
|   |   |   | TREM2        | triggering receptor expressed on myeloid cells 2                            | ns                 | ns     | 3.1    |
|   |   |   | SMIM14       | small integral membrane protein 14                                          | ns                 | -3.1   | ns     |
|   |   |   | LINC01139    | long intergenic non-protein coding RNA 1139                                 | ns                 | ns     | 3.1    |
|   |   |   | ABCC3        | ATP binding cassette subfamily C member 3                                   | ns                 | -3.1   | ns     |
|   |   |   | BTN3A2       | butyrophilin, subfamily 3, member A2                                        | ns                 | ns     | 3.1    |
|   |   |   | ITGAM        | integrin, alpha M (complement component 3 receptor 3 subunit)               | ns                 | -3.1   | ns     |
|   |   |   | TNFSF8       | tumor necrosis factor (ligand) superfamily, member 8                        | ns                 | ns     | 3.1    |
|   |   |   | LINC00706    | long intergenic non-protein coding RNA 706                                  | ns                 | -3.1   | ns     |
|   |   |   | SRPX2        | sushi-repeat containing protein, X-linked 2                                 | ns                 | ns     | 3.1    |
|   |   |   | PIGK         | phosphatidylinositol glycan anchor biosynthesis class K                     | ns                 | -3.1   | ns     |
|   |   |   | IL15RA       | interleukin 15 receptor, alpha                                              | ns                 | -3.1   | ns     |
|   |   |   | PVR          | poliovirus receptor                                                         | ns                 | -3.1   | ns     |
|   |   |   | SFT2D2       | SFT2 domain containing 2                                                    | ns                 | -3.1   | ns     |
|   |   |   | FCGR1A       | Fc fragment of IgG, high affinity Ia, receptor (CD64)                       | ns                 | ns     | 3.1    |
|   |   |   | NID2         | nidogen 2 (osteonidogen)                                                    | ns                 | ns     | 3.1    |
|   |   |   | TMEM31       | transmembrane protein 31                                                    | ns                 | -3.1   | ns     |
|   |   |   | LINC00484    | long intergenic non-protein coding RNA 484                                  | ns                 | -3.1   | ns     |
|   |   |   | PRXL2C       | peroxiredoxin like 2C                                                       | ns                 | -3.1   | ns     |
|   |   |   | FLNA         | filamin A, alpha                                                            | ns                 | -3.1   | ns     |
|   |   |   | C8orf48      | chromosome 8 open reading frame 48                                          | ns                 | ns     | 3.1    |
|   |   |   | SERTM2       | serine rich and transmembrane domain containing 2                           | ns                 | -3.1   | ns     |
|   |   |   | ANKRD36BP1   | ankyrin repeat domain 36B pseudogene 1                                      | ns                 | -3.1   | ns     |
|   |   |   | PLCB4        | phospholipase C, beta 4                                                     | ns                 | ns     | 3.1    |
|   |   |   | RPGRIP1L     | RPGRIP1-like                                                                | ns                 | -3.1   | ns     |
|   |   |   | CBL          | Cbl proto-oncogene, E3 ubiquitin protein ligase                             | ns                 | -3.0   | ns     |
|   |   |   | ATP8B4       | ATPase, class I, type 8B, member 4                                          | ns                 | ns     | 3.0    |
|   |   |   | SAA1         | serum amyloid A1                                                            | ns                 | -3.0   | ns     |
|   |   |   | PLCE1        | phospholipase C, epsilon 1                                                  | ns                 | ns     | 3.0    |

| S | C | E | Symbol       | Name                                                                                     | Linear Fold Change |        |        |
|---|---|---|--------------|------------------------------------------------------------------------------------------|--------------------|--------|--------|
|   |   |   |              |                                                                                          | S vs C             | S vs E | E vs C |
|   |   |   | DEPP1        | DEPP1 autophagy regulator                                                                | ns                 | ns     | 3.0    |
|   |   |   | PKP4         | plakophilin 4                                                                            | ns                 | ns     | 3.0    |
|   |   |   | ADGRD1       | adhesion G protein-coupled receptor D1                                                   | ns                 | ns     | 3.0    |
|   |   |   | GBP1         | guanylate binding protein 1, interferon-inducible                                        | ns                 | -3.0   | ns     |
|   |   |   | SNX16        | sorting nexin 16                                                                         | ns                 | -3.0   | ns     |
|   |   |   | OSR2         | odd-skipped related transcription factor 2                                               | ns                 | -3.0   | ns     |
|   |   |   | CHSY3        | chondroitin sulfate synthase 3                                                           | ns                 | ns     | 3.0    |
|   |   |   | IKZF3        | IKAROS family zinc finger 3                                                              | ns                 | -3.0   | ns     |
|   |   |   | MED14OS      | MED14 opposite strand                                                                    | ns                 | ns     | 3.0    |
|   |   |   | FGD5         | FYVE, RhoGEF and PH domain containing 5                                                  | ns                 | ns     | 3.0    |
|   |   |   | ZDHHC9       | zinc finger, DHHC-type containing 9                                                      | ns                 | -3.0   | ns     |
|   |   |   | LINC01357    | long intergenic non-protein coding RNA 1357                                              | ns                 | -3.0   | ns     |
|   |   |   | DUSP1        | dual specificity phosphatase 1                                                           | ns                 | -2.9   | ns     |
|   |   |   | LOC101927780 | uncharacterized LOC101927780                                                             | ns                 | -2.9   | ns     |
|   |   |   | CACNA2D1     | calcium channel, voltage-dependent, alpha 2                                              | ns                 | ns     | 2.9    |
|   |   |   | PAPSS2       | 3-phosphoadenosine 5-phosphosulfate synthase 2                                           | ns                 | ns     | 2.9    |
|   |   |   | BST2         | bone marrow stromal cell antigen 2                                                       | ns                 | -2.9   | ns     |
|   |   |   | IRF8         | interferon regulatory factor 8                                                           | ns                 | -2.9   | ns     |
|   |   |   | HLA-L        | major histocompatibility complex, class I, L (pseudogene)                                | ns                 | -2.9   | ns     |
|   |   |   | CMTM7        | CKLF-like MARVEL transmembrane domain containing 7                                       | ns                 | ns     | 2.9    |
|   |   |   | GNG4         | guanine nucleotide binding protein (G protein), gamma 4                                  | ns                 | -2.9   | ns     |
|   |   |   | AIF1         | allograft inflammatory factor 1                                                          | ns                 | ns     | 2.9    |
|   |   |   | DOP1B        | DOP1 leucine zipper like protein B                                                       | ns                 | -2.9   | ns     |
|   |   |   | PYCARD       | PYD and CARD domain containing                                                           | ns                 | ns     | 2.9    |
|   |   |   | SPRED1       | sprouty-related, EVH1 domain containing 1                                                | ns                 | ns     | 2.9    |
|   |   |   | KIR2DL2      | killer cell immunoglobulin-like receptor, two domains, long cytoplasmic tail, 2          | ns                 | -2.9   | ns     |
|   |   |   | PCDHB2       | protocadherin beta 2                                                                     | ns                 | -2.9   | ns     |
|   |   |   | NCKAP1L      | NCK-associated protein 1-like                                                            | ns                 | ns     | 2.9    |
|   |   |   | CABYR        | calcium binding tyrosine-(Y)-phosphorylation regulated                                   | ns                 | -2.9   | ns     |
|   |   |   | HLTF         | helicase-like transcription factor                                                       | ns                 | -2.9   | ns     |
|   |   |   | LPCAT2       | lysophosphatidylcholine acyltransferase 2                                                | ns                 | -2.8   | ns     |
|   |   |   | TRIM21       | tripartite motif containing 21                                                           | ns                 | -2.8   | ns     |
|   |   |   | RNF24        | ring finger protein 24                                                                   | ns                 | -2.8   | ns     |
|   |   |   | SLFN13       | schlafen family member 13                                                                | ns                 | ns     | 2.8    |
|   |   |   | SH3BGRL3     | SH3 domain binding glutamate-rich protein like 3                                         | ns                 | -2.8   | ns     |
|   |   |   | SELENOM      | selenoprotein M                                                                          | ns                 | -2.8   | ns     |
|   |   |   | CYBA         | cytochrome b-245, alpha polypeptide                                                      | ns                 | -2.8   | ns     |
|   |   |   | ATP11C       | ATPase, class VI, type 11C                                                               | ns                 | -2.8   | ns     |
|   |   |   | IFITM4P      | interferon induced transmembrane protein 4 pseudogene                                    | ns                 | -2.8   | ns     |
|   |   |   | CMC1         | C-x(9)-C motif containing 1                                                              | ns                 | -2.8   | ns     |
|   |   |   | TUBA1A       | tubulin, alpha 1a                                                                        | ns                 | ns     | 2.8    |
|   |   |   | LOC100506688 | uncharacterized LOC100506688                                                             | ns                 | ns     | 2.8    |
|   |   |   | LILRB4       | leukocyte immunoglobulin-like receptor, subfamily B (with TM and ITIM domains), member 4 | ns                 | -2.7   | ns     |
|   |   |   | FOSL2        | FOS-like antigen 2                                                                       | ns                 | -2.7   | ns     |
|   |   |   | TNFSF13      | tumor necrosis factor (ligand) superfamily, member 13                                    | ns                 | ns     | 2.7    |
|   |   |   | ZNF32-AS1    | ZNF32 antisense RNA 1                                                                    | ns                 | ns     | 2.7    |
|   |   |   | LOC101928047 | uncharacterized LOC101928047                                                             | ns                 | -2.7   | ns     |
|   |   |   | ADAMTS9-AS2  | ADAMTS9 antisense RNA 2                                                                  | ns                 | ns     | 2.7    |
|   |   |   | TENT5C       | terminal nucleotidyltransferase 5C                                                       | ns                 | ns     | 2.7    |
|   |   |   | STMN2        | stathmin 2                                                                               | ns                 | -2.7   | ns     |
|   |   |   | IFIT5        | interferon-induced protein with tetratricopeptide repeats 5                              | ns                 | -2.7   | ns     |
|   |   |   | HABP4        | hyaluronan binding protein 4                                                             | ns                 | -2.7   | ns     |
|   |   |   | PIK3R1       | phosphoinositide-3-kinase, regulatory subunit 1 (alpha)                                  | ns                 | -2.7   | ns     |
|   |   |   | GGT2         | gamma-glutamyltransferase 2                                                              | ns                 | -2.7   | ns     |
|   |   |   | CCDC80       | coiled-coil domain containing 80                                                         | ns                 | -2.7   | ns     |

| S | C | E | Symbol       | Name                                                                   | Linear Fold Change |        |        |
|---|---|---|--------------|------------------------------------------------------------------------|--------------------|--------|--------|
|   |   |   |              |                                                                        | S vs C             | S vs E | E vs C |
|   |   |   | C12orf60     | chromosome 12 open reading frame 60                                    | ns                 | -2.7   | ns     |
|   |   |   | CLUAP1       | clusterin associated protein 1                                         | ns                 | ns     | 2.7    |
|   |   |   | FNDC1        | fibronectin type III domain containing 1                               | ns                 | ns     | 2.7    |
|   |   |   | VAT1         | vesicle amine transport 1                                              | ns                 | -2.7   | ns     |
|   |   |   | TACR3        | tachykinin receptor 3                                                  | ns                 | -2.7   | ns     |
|   |   |   | PIAS2        | protein inhibitor of activated STAT 2                                  | ns                 | ns     | 2.7    |
|   |   |   | GRIA3        | glutamate receptor, ionotropic, AMPA 3                                 | ns                 | -2.7   | ns     |
|   |   |   | BICD1        | bicaudal D homolog 1 (Drosophila)                                      | ns                 | ns     | 2.7    |
|   |   |   | CLIP3        | CAP-GLY domain containing linker protein 3                             | ns                 | ns     | 2.6    |
|   |   |   | SNX10        | sorting nexin 10                                                       | ns                 | -2.6   | ns     |
|   |   |   | BST1         | bone marrow stromal cell antigen 1                                     | ns                 | -2.6   | ns     |
|   |   |   | C19orf53     | chromosome 19 open reading frame 53                                    | ns                 | -2.6   | ns     |
|   |   |   | MITF         | microphthalmia-associated transcription factor                         | ns                 | -2.6   | ns     |
|   |   |   | CHST15       | carbohydrate (N-acetylgalactosamine 4-sulfate 6-O) sulfotransferase 15 | ns                 | -2.6   | ns     |
|   |   |   | KIF13B       | kinesin family member 13B                                              | ns                 | ns     | 2.6    |
|   |   |   | LOX          | lysyl oxidase                                                          | ns                 | -2.6   | ns     |
|   |   |   | MYDGF        | myeloid-derived growth factor                                          | ns                 | -2.6   | ns     |
|   |   |   | LACTB2       | lactamase, beta 2                                                      | ns                 | ns     | 2.6    |
|   |   |   | RSAD2        | radical S-adenosyl methionine domain containing 2                      | ns                 | -2.6   | ns     |
|   |   |   | ERBIN        | erbB2 interacting protein                                              | ns                 | -2.6   | ns     |
|   |   |   | FBXO6        | F-box protein 6                                                        | ns                 | -2.6   | ns     |
|   |   |   | TMEM176A     | transmembrane protein 176A                                             | ns                 | -2.6   | ns     |
|   |   |   | NAIP         | NLR family, apoptosis inhibitory protein                               | ns                 | ns     | 2.6    |
|   |   |   | CEP112       | centrosomal protein 112kDa                                             | ns                 | ns     | 2.6    |
|   |   |   | C4A          | complement component 4A (Rodgers blood group)                          | ns                 | -2.6   | ns     |
|   |   |   | RCN3         | reticulocalbin 3, EF-hand calcium binding domain                       | ns                 | -2.6   | ns     |
|   |   |   | REX1BD       | required for excision 1-B domain containing                            | ns                 | -2.6   | ns     |
|   |   |   | RECK         | reversion-inducing-cysteine-rich protein with kazal motifs             | ns                 | -2.6   | ns     |
|   |   |   | PTK2B        | protein tyrosine kinase 2 beta                                         | ns                 | -2.6   | ns     |
|   |   |   | AAMDC        | adipogenesis associated, Mth938 domain containing                      | ns                 | -2.6   | ns     |
|   |   |   | ACOT9        | acyl-CoA thioesterase 9                                                | ns                 | ns     | 2.6    |
|   |   |   | TMX3         | thioredoxin-related transmembrane protein 3                            | ns                 | -2.6   | ns     |
|   |   |   | CD4          | CD4 molecule                                                           | ns                 | ns     | 2.6    |
|   |   |   | ADAP2        | ArfGAP with dual PH domains 2                                          | ns                 | ns     | 2.6    |
|   |   |   | TMSB4XP4     | thymosin beta 4, X-linked pseudogene 4                                 | ns                 | ns     | 2.6    |
|   |   |   | ATG4A        | autophagy related 4A, cysteine peptidase                               | ns                 | ns     | 2.6    |
|   |   |   | C4B          | complement component 4B (Chido blood group)                            | ns                 | -2.6   | ns     |
|   |   |   | LOC100506388 | uncharacterized LOC100506388                                           | ns                 | ns     | 2.6    |
|   |   |   | DIRAS2       | DIRAS family, GTP-binding RAS-like 2                                   | ns                 | -2.6   | ns     |
|   |   |   | SFMBT2       | Scm-like with four mbt domains 2                                       | ns                 | ns     | 2.6    |
|   |   |   | ATRNL        | attractin                                                              | ns                 | -2.6   | ns     |
|   |   |   | ARHGAP31     | Rho GTPase activating protein 31                                       | ns                 | -2.5   | ns     |
|   |   |   | IQCK         | IQ motif containing K                                                  | ns                 | ns     | 2.5    |
|   |   |   | DRAM1        | DNA-damage regulated autophagy modulator 1                             | ns                 | -2.5   | ns     |
|   |   |   | FKBP7        | FK506 binding protein 7                                                | ns                 | -2.5   | ns     |
|   |   |   | CHI3L1       | chitinase 3-like 1 (cartilage glycoprotein-39)                         | ns                 | -2.5   | ns     |
|   |   |   | SPSB1        | splA                                                                   | ns                 | -2.5   | ns     |
|   |   |   | CDC42EP5     | CDC42 effector protein (Rho GTPase binding) 5                          | ns                 | -2.5   | ns     |
|   |   |   | APOBEC3G     | apolipoprotein B mRNA editing enzyme, catalytic polypeptide-like 3G    | ns                 | -2.5   | ns     |
|   |   |   | TUBE1        | tubulin, epsilon 1                                                     | ns                 | -2.5   | ns     |
|   |   |   | TRAF5        | TNF receptor-associated factor 5                                       | ns                 | ns     | 2.5    |
|   |   |   | TCEAL1       | transcription elongation factor A (SII)-like 1                         | ns                 | -2.5   | ns     |
|   |   |   | ENDOG        | endonuclease G                                                         | ns                 | -2.5   | ns     |
|   |   |   | CRYAB        | crystallin alpha B                                                     | ns                 | ns     | 2.5    |
|   |   |   | PLBD2        | phospholipase B domain containing 2                                    | ns                 | -2.5   | ns     |

| S | C | E | Symbol       | Name                                                                                   | Linear Fold Change |        |        |
|---|---|---|--------------|----------------------------------------------------------------------------------------|--------------------|--------|--------|
|   |   |   |              |                                                                                        | S vs C             | S vs E | E vs C |
|   |   |   | PLXNB2       | plexin B2                                                                              | ns                 | -2.5   | ns     |
|   |   |   | CAPNS1       | calpain, small subunit 1                                                               | ns                 | -2.5   | ns     |
|   |   |   | CD300A       | CD300a molecule                                                                        | ns                 | -2.5   | ns     |
|   |   |   | HECTD2       | HECT domain containing E3 ubiquitin protein ligase 2                                   | ns                 | ns     | 2.5    |
|   |   |   | CCDC107      | coiled-coil domain containing 107                                                      | ns                 | -2.5   | ns     |
|   |   |   | HIF1A-AS2    | HIF1A antisense RNA 2                                                                  | ns                 | -2.5   | ns     |
|   |   |   | NPR2         | natriuretic peptide receptor 2                                                         | ns                 | ns     | 2.5    |
|   |   |   | RNF152       | ring finger protein 152                                                                | ns                 | ns     | 2.5    |
|   |   |   | CD84         | CD84 molecule                                                                          | ns                 | ns     | 2.5    |
|   |   |   | TST          | thiosulfate sulfurtransferase (rhodanese)                                              | ns                 | -2.5   | ns     |
|   |   |   | EID1         | EP300 interacting inhibitor of differentiation 1                                       | ns                 | ns     | 2.5    |
|   |   |   | TMEM176B     | transmembrane protein 176B                                                             | ns                 | -2.5   | ns     |
|   |   |   | RGS10        | regulator of G-protein signaling 10                                                    | ns                 | -2.5   | ns     |
|   |   |   | SOCS5        | suppressor of cytokine signaling 5                                                     | ns                 | ns     | 2.5    |
|   |   |   | SLC35B2      | solute carrier family 35 (adenosine 3-phospho 5-phosphosulfate transporter), member B2 | ns                 | -2.5   | ns     |
|   |   |   | LOC102724776 | uncharacterized LOC102724776                                                           | ns                 | ns     | 2.5    |
|   |   |   | CALHM5       | calcium homeostasis modulator family member 5                                          | ns                 | ns     | 2.5    |
|   |   |   | TFEC         | transcription factor EC                                                                | ns                 | ns     | 2.5    |
|   |   |   | ABCC1        | ATP binding cassette subfamily C member 1                                              | ns                 | -2.5   | ns     |
|   |   |   | PARVA        | parvin, alpha                                                                          | ns                 | -2.5   | ns     |
|   |   |   | VWCE         | von Willebrand factor C and EGF domains                                                | ns                 | -2.3   | ns     |
|   |   |   | TNS1         | tensin 1                                                                               | ns                 | ns     | 2.4    |
|   |   |   | WDR44        | WD repeat domain 44                                                                    | ns                 | -2.4   | ns     |
|   |   |   | GALC         | galactosylceramidase                                                                   | ns                 | -2.4   | ns     |
|   |   |   | ARL6         | ADP-ribosylation factor like GTPase 6                                                  | ns                 | ns     | 2.4    |
|   |   |   | CAVIN3       | caveolae associated protein 3                                                          | ns                 | ns     | 2.4    |
|   |   |   | PAPSS1       | 3-phosphoadenosine 5-phosphosulfate synthase 1                                         | ns                 | -2.4   | ns     |
|   |   |   | JOSD2        | Josephin domain containing 2                                                           | ns                 | -2.4   | ns     |
|   |   |   | ARHGAP20     | Rho GTPase activating protein 20                                                       | ns                 | ns     | 2.4    |
|   |   |   | TMEM219      | transmembrane protein 219                                                              | ns                 | -2.4   | ns     |
|   |   |   | FAM8A1       | family with sequence similarity 8, member A1                                           | ns                 | -2.4   | ns     |
|   |   |   | PGM2L1       | phosphoglucomutase 2-like 1                                                            | ns                 | -2.4   | ns     |
|   |   |   | CARD6        | caspase recruitment domain family, member 6                                            | ns                 | ns     | 2.4    |
|   |   |   | ZNF699       | zinc finger protein 699                                                                | ns                 | -2.4   | ns     |
|   |   |   | PCYOX1       | prenylcysteine oxidase 1                                                               | ns                 | -2.4   | ns     |
|   |   |   | DNAJC10      | DnaJ (Hsp40) homolog, subfamily C, member 10                                           | ns                 | -2.4   | ns     |
|   |   |   | C2           | complement component 2                                                                 | ns                 | ns     | 2.4    |
|   |   |   | ALPK2        | alpha kinase 2                                                                         | ns                 | -2.4   | ns     |
|   |   |   | CPEB2        | cytoplasmic polyadenylation element binding protein 2                                  | ns                 | -2.4   | ns     |
|   |   |   | IL17RA       | interleukin 17 receptor A                                                              | ns                 | -2.4   | ns     |
|   |   |   | RGS4         | regulator of G-protein signaling 4                                                     | ns                 | -2.4   | ns     |
|   |   |   | CTIF         | CBP80                                                                                  | ns                 | -2.4   | ns     |
|   |   |   | NMNAT1       | nicotinamide nucleotide adenyltransferase 1                                            | ns                 | ns     | 2.4    |
|   |   |   | PREPL        | prolyl endopeptidase-like                                                              | ns                 | ns     | 2.4    |
|   |   |   | TPGS2        | tubulin polyglutamylase complex subunit 2                                              | ns                 | -2.4   | ns     |
|   |   |   | TNS2         | tensin 2                                                                               | ns                 | ns     | 2.4    |
|   |   |   | ZBTB8A       | zinc finger and BTB domain containing 8A                                               | ns                 | -2.4   | ns     |
|   |   |   | TXNDC15      | thioredoxin domain containing 15                                                       | ns                 | -2.4   | ns     |
|   |   |   | CTSO         | cathepsin O                                                                            | ns                 | ns     | 2.4    |
|   |   |   | RGS5         | regulator of G-protein signaling 5                                                     | ns                 | ns     | 2.4    |
|   |   |   | UBE2D1       | ubiquitin conjugating enzyme E2D 1                                                     | ns                 | -2.4   | ns     |
|   |   |   | PLCD3        | phospholipase C, delta 3                                                               | ns                 | -2.4   | ns     |
|   |   |   | SELENOW      | selenoprotein W                                                                        | ns                 | -2.4   | ns     |
|   |   |   | UST          | uronyl-2-sulfotransferase                                                              | ns                 | ns     | 2.4    |
|   |   |   | ACTR1B       | ARP1 actin-related protein 1 homolog B, contractin beta (yeast)                        | ns                 | -2.4   | ns     |



| S | C | E | Symbol       | Name                                                                              | Linear Fold Change |        |        |
|---|---|---|--------------|-----------------------------------------------------------------------------------|--------------------|--------|--------|
|   |   |   |              |                                                                                   | S vs C             | S vs E | E vs C |
|   |   |   | LRRN4CL      | LRRN4 C-terminal like                                                             | ns                 | -2.4   | ns     |
|   |   |   | OTUD1        | OTU deubiquitinase 1                                                              | ns                 | -2.3   | ns     |
|   |   |   | LIG4         | ligase IV, DNA, ATP-dependent                                                     | ns                 | ns     | 2.3    |
|   |   |   | GLS          | glutaminase                                                                       | ns                 | -2.3   | ns     |
|   |   |   | THRA         | thyroid hormone receptor, alpha                                                   | ns                 | ns     | 2.3    |
|   |   |   | HLA-F        | major histocompatibility complex, class I, F                                      | ns                 | -2.3   | ns     |
|   |   |   | LOC100287042 | uncharacterized LOC100287042                                                      | ns                 | -2.3   | ns     |
|   |   |   | IFI35        | interferon-induced protein 35                                                     | ns                 | -2.3   | ns     |
|   |   |   | SLC39A6      | solute carrier family 39 (zinc transporter), member 6                             | ns                 | -2.3   | ns     |
|   |   |   | SLC66A3      | solute carrier family 66 member 3                                                 | ns                 | -2.3   | ns     |
|   |   |   | VKORC1       | vitamin K epoxide reductase complex subunit 1                                     | ns                 | -2.3   | ns     |
|   |   |   | LNPB         | lunapark, ER junction formation factor                                            | ns                 | -2.3   | ns     |
|   |   |   | LRR6         | leucine rich repeat containing 6                                                  | ns                 | ns     | 2.3    |
|   |   |   | MX2          | MX dynamin-like GTPase 2                                                          | ns                 | -2.3   | ns     |
|   |   |   | GYPB         | glycophorin C (Gerbich blood group)                                               | ns                 | ns     | 2.3    |
|   |   |   | SS18L2       | synovial sarcoma translocation gene on chromosome 18-like 2                       | ns                 | -2.3   | ns     |
|   |   |   | ODF3B        | outer dense fiber of sperm tails 3B                                               | ns                 | -2.3   | ns     |
|   |   |   | CA11         | carbonic anhydrase XI                                                             | ns                 | -2.3   | ns     |
|   |   |   | LOC100996842 | uncharacterized LOC100996842                                                      | ns                 | -2.3   | ns     |
|   |   |   | WASHC3       | WASH complex subunit 3                                                            | ns                 | -2.3   | ns     |
|   |   |   | LOC102724094 | uncharacterized LOC102724094                                                      | ns                 | -2.3   | ns     |
|   |   |   | OAF          | out at first homolog                                                              | ns                 | -2.3   | ns     |
|   |   |   | FTH1         | ferritin, heavy polypeptide 1                                                     | ns                 | -2.3   | ns     |
|   |   |   | TTC39B       | tetratricopeptide repeat domain 39B                                               | ns                 | ns     | 2.3    |
|   |   |   | SLC9B2       | solute carrier family 9, subfamily B (NHA2, cation proton antiporter 2), member 2 | ns                 | ns     | 2.3    |
|   |   |   | P4HA2        | prolyl 4-hydroxylase, alpha polypeptide II                                        | ns                 | -2.3   | ns     |
|   |   |   | INHBB        | inhibin beta B                                                                    | ns                 | -2.3   | ns     |
|   |   |   | ACAT1        | acetyl-CoA acetyltransferase 1                                                    | ns                 | ns     | 2.3    |
|   |   |   | ATP6V0E1     | ATPase, H <sup>+</sup> transporting, lysosomal 9kDa, V0 subunit e1                | ns                 | -2.3   | ns     |
|   |   |   | TMEM204      | transmembrane protein 204                                                         | ns                 | ns     | 2.3    |
|   |   |   | RAMP1        | receptor (G protein-coupled) activity modifying protein 1                         | ns                 | -2.3   | ns     |
|   |   |   | RGS16        | regulator of G-protein signaling 16                                               | ns                 | -2.3   | ns     |
|   |   |   | ZNF562       | zinc finger protein 562                                                           | ns                 | -2.3   | ns     |
|   |   |   | DDAH1        | dimethylarginine dimethylaminohydrolase 1                                         | ns                 | ns     | 2.3    |
|   |   |   | MIR3622A     | microRNA 3622a                                                                    | ns                 | -2.3   | ns     |
|   |   |   | LY86         | lymphocyte antigen 86                                                             | ns                 | -2.3   | ns     |
|   |   |   | POLR2I       | polymerase (RNA) II (DNA directed) polypeptide I, 14.5kDa                         | ns                 | -2.3   | ns     |
|   |   |   | S100A4       | S100 calcium binding protein A4                                                   | ns                 | -2.3   | ns     |
|   |   |   | ERGIC1       | endoplasmic reticulum-golgi intermediate compartment 1                            | ns                 | -2.3   | ns     |
|   |   |   | RUNX3        | runt-related transcription factor 3                                               | ns                 | ns     | 2.3    |
|   |   |   | ZNF330       | zinc finger protein 330                                                           | ns                 | ns     | 2.3    |
|   |   |   | PSMB9        | proteasome subunit beta 9                                                         | ns                 | -2.3   | ns     |
|   |   |   | KIR2DS4      | killer cell immunoglobulin-like receptor, two domains, short cytoplasmic tail, 4  | ns                 | ns     | 2.3    |
|   |   |   | SOCS3        | suppressor of cytokine signaling 3                                                | ns                 | -2.2   | ns     |
|   |   |   | C1GALT1C1    | C1GALT1 specific chaperone 1                                                      | ns                 | -2.2   | ns     |
|   |   |   | DECR1        | 2,4-dienoyl-CoA reductase 1, mitochondrial                                        | ns                 | ns     | 2.2    |
|   |   |   | TPRG1L       | tumor protein p63 regulated 1-like                                                | ns                 | -2.2   | ns     |
|   |   |   | MAP1A        | microtubule associated protein 1A                                                 | ns                 | -2.2   | ns     |
|   |   |   | TCTA         | T-cell leukemia translocation altered                                             | ns                 | ns     | 2.2    |
|   |   |   | DNASE2       | deoxyribonuclease II, lysosomal                                                   | ns                 | -2.2   | ns     |
|   |   |   | ARL2BP       | ADP-ribosylation factor like GTPase 2 binding protein                             | ns                 | ns     | 2.2    |
|   |   |   | CELF2-AS1    | CELF2 antisense RNA 1                                                             | ns                 | -2.2   | ns     |
|   |   |   | CYTIP        | cytohesin 1 interacting protein                                                   | ns                 | -2.2   | ns     |
|   |   |   | HHEX         | hematopoietically expressed homeobox                                              | ns                 | ns     | 2.2    |
|   |   |   | THBS3        | thrombospondin 3                                                                  | ns                 | -2.2   | ns     |

| S | C | E | Symbol   | Name                                                                             | Linear Fold Change |        |        |
|---|---|---|----------|----------------------------------------------------------------------------------|--------------------|--------|--------|
|   |   |   |          |                                                                                  | S vs C             | S vs E | E vs C |
|   |   |   | TEX2     | testis expressed 2                                                               | ns                 | -2.2   | ns     |
|   |   |   | RNF130   | ring finger protein 130                                                          | ns                 | ns     | 2.2    |
|   |   |   | FAM20A   | family with sequence similarity 20, member A                                     | ns                 | -2.2   | ns     |
|   |   |   | POT1-AS1 | POT1 antisense RNA 1                                                             | ns                 | -2.2   | ns     |
|   |   |   | STAT3    | signal transducer and activator of transcription 3 (acute-phase response factor) | ns                 | -2.2   | ns     |
|   |   |   | SIAE     | sialic acid acetyltransferase                                                    | ns                 | -2.2   | ns     |
|   |   |   | AHNAK2   | AHNAK nucleoprotein 2                                                            | ns                 | -2.2   | ns     |
|   |   |   | KLHL2    | kelch-like family member 2                                                       | ns                 | -2.2   | ns     |
|   |   |   | ZYX      | zyxin                                                                            | ns                 | -2.2   | ns     |
|   |   |   | ZNHIT1   | zinc finger, HIT-type containing 1                                               | ns                 | -2.2   | ns     |
|   |   |   | LTA4H    | leukotriene A4 hydrolase                                                         | ns                 | -2.2   | ns     |
|   |   |   | SLC37A3  | solute carrier family 37, member 3                                               | ns                 | -2.2   | ns     |
|   |   |   | TNXA     | tenascin XA (pseudogene)                                                         | ns                 | ns     | 2.2    |
|   |   |   | GGT3P    | gamma-glutamyltransferase 3 pseudogene                                           | ns                 | ns     | 2.2    |
|   |   |   | ETHE1    | ethylmalonic encephalopathy 1                                                    | ns                 | -2.2   | ns     |
|   |   |   | TWIST2   | twist family bHLH transcription factor 2                                         | ns                 | -2.2   | ns     |
|   |   |   | TUSC2    | tumor suppressor candidate 2                                                     | ns                 | -2.2   | ns     |
|   |   |   | LITAF    | lipopolysaccharide-induced TNF factor                                            | ns                 | -2.2   | ns     |
|   |   |   | FKBP1B   | FK506 binding protein 1B                                                         | ns                 | -2.2   | ns     |
|   |   |   | AKAP12   | A kinase (PRKA) anchor protein 12                                                | ns                 | -2.2   | ns     |
|   |   |   | LY6D     | lymphocyte antigen 6 complex, locus D                                            | ns                 | -2.2   | ns     |
|   |   |   | LHFPL6   | LHFPL tetraspan subfamily member 6                                               | ns                 | -2.2   | ns     |
|   |   |   | ASL      | argininosuccinate lyase                                                          | ns                 | -2.2   | ns     |
|   |   |   | KREMEN1  | kringle containing transmembrane protein 1                                       | ns                 | -2.2   | ns     |
|   |   |   | PROCR    | protein C receptor, endothelial                                                  | ns                 | -2.2   | ns     |
|   |   |   | MARCHF2  | membrane associated ring-CH-type finger 2                                        | ns                 | -2.2   | ns     |
|   |   |   | TWF2     | twinfilin actin binding protein 2                                                | ns                 | -2.2   | ns     |
|   |   |   | ADD3     | adducin 3 (gamma)                                                                | ns                 | ns     | 2.2    |
|   |   |   | ZBTB16   | zinc finger and BTB domain containing 16                                         | ns                 | -2.2   | ns     |
|   |   |   | RAB31    | RAB31, member RAS oncogene family                                                | ns                 | ns     | 2.2    |
|   |   |   | IL17RE   | interleukin 17 receptor E                                                        | ns                 | -2.1   | ns     |
|   |   |   | FUNDC1   | FUN14 domain containing 1                                                        | ns                 | -2.2   | ns     |
|   |   |   | H6PD     | hexose-6-phosphate dehydrogenase (glucose 1-dehydrogenase)                       | ns                 | -2.2   | ns     |
|   |   |   | SPOCK2   | sparc                                                                            | ns                 | -2.2   | ns     |
|   |   |   | CLSTN2   | calsyntenin 2                                                                    | ns                 | -2.2   | ns     |
|   |   |   | LGALS3   | lectin, galactoside-binding, soluble, 3                                          | ns                 | -2.2   | ns     |
|   |   |   | MED11    | mediator complex subunit 11                                                      | ns                 | -2.2   | ns     |
|   |   |   | ABR      | active BCR-related                                                               | ns                 | -2.2   | ns     |
|   |   |   | GNA15    | guanine nucleotide binding protein (G protein), alpha 15 (Gq class)              | ns                 | -2.1   | ns     |
|   |   |   | ITGA3    | integrin alpha 3                                                                 | ns                 | -2.1   | ns     |
|   |   |   | CASP1    | caspase 1                                                                        | ns                 | ns     | 2.1    |
|   |   |   | MR1      | major histocompatibility complex, class I-related                                | ns                 | -2.1   | ns     |
|   |   |   | STX2     | syntaxin 2                                                                       | ns                 | ns     | 2.1    |
|   |   |   | GPR4     | G protein-coupled receptor 4                                                     | ns                 | ns     | 2.1    |
|   |   |   | ABCA1    | ATP binding cassette subfamily A member 1                                        | ns                 | -2.1   | ns     |
|   |   |   | CYP2U1   | cytochrome P450, family 2, subfamily U, polypeptide 1                            | ns                 | -2.1   | ns     |
|   |   |   | CYTH4    | cytohesin 4                                                                      | ns                 | ns     | 2.1    |
|   |   |   | FKBP10   | FK506 binding protein 10                                                         | ns                 | -2.1   | ns     |
|   |   |   | LRRC37A3 | leucine rich repeat containing 37, member A3                                     | ns                 | -2.1   | ns     |
|   |   |   | SLCO3A1  | solute carrier organic anion transporter family, member 3A1                      | ns                 | -2.1   | ns     |
|   |   |   | TRG-AS1  | T cell receptor gamma locus antisense RNA 1                                      | ns                 | -2.1   | ns     |
|   |   |   | ODF2L    | outer dense fiber of sperm tails 2-like                                          | ns                 | -2.1   | ns     |
|   |   |   | LMAN2    | lectin, mannose-binding 2                                                        | ns                 | -2.1   | ns     |
|   |   |   | IRF9     | interferon regulatory factor 9                                                   | ns                 | -2.0   | ns     |
|   |   |   | CAPN5    | calpain 5                                                                        | ns                 | -2.1   | ns     |

| S | C | E | Symbol       | Name                                                                              | Linear Fold Change |        |        |
|---|---|---|--------------|-----------------------------------------------------------------------------------|--------------------|--------|--------|
|   |   |   |              |                                                                                   | S vs C             | S vs E | E vs C |
|   |   |   | NFASC        | neurofascin                                                                       | ns                 | -2.1   | ns     |
|   |   |   | METTL24      | methyltransferase like 24                                                         | ns                 | ns     | 2.1    |
|   |   |   | SNHG16       | small nucleolar RNA host gene 16                                                  | ns                 | -2.1   | ns     |
|   |   |   | PPP1R7       | protein phosphatase 1, regulatory subunit 7                                       | ns                 | -2.1   | ns     |
|   |   |   | MFSD6        | major facilitator superfamily domain containing 6                                 | ns                 | ns     | 2.1    |
|   |   |   | METTL23      | methyltransferase like 23                                                         | ns                 | -2.1   | ns     |
|   |   |   | HOXA5        | homeobox A5                                                                       | ns                 | -2.1   | ns     |
|   |   |   | SLC31A1      | solute carrier family 31 (copper transporter), member 1                           | ns                 | -2.1   | ns     |
|   |   |   | TNFRSF21     | tumor necrosis factor receptor superfamily, member 21                             | ns                 | -2.1   | ns     |
|   |   |   | SPIRE1       | spire-type actin nucleation factor 1                                              | ns                 | -2.1   | ns     |
|   |   |   | HLA-DQB2     | major histocompatibility complex, class II, DQ beta 2                             | ns                 | -2.1   | ns     |
|   |   |   | BLOC1S6      | biogenesis of lysosomal organelles complex-1, subunit 6, pallidin                 | ns                 | -2.1   | ns     |
|   |   |   | CNTN4        | contactin 4                                                                       | ns                 | ns     | 2.1    |
|   |   |   | CARS1        | cysteinyl-tRNA synthetase 1                                                       | ns                 | -2.1   | ns     |
|   |   |   | GPBAR1       | G protein-coupled bile acid receptor 1                                            | ns                 | -2.1   | ns     |
|   |   |   | LOC100506928 | uncharacterized LOC100506928                                                      | ns                 | -2.1   | ns     |
|   |   |   | SLA          | Src-like-adaptor                                                                  | ns                 | ns     | 2.1    |
|   |   |   | FAM98C       | family with sequence similarity 98, member C                                      | ns                 | -2.1   | ns     |
|   |   |   | BBS5         | Bardet-Biedl syndrome 5                                                           | ns                 | ns     | 2.1    |
|   |   |   | FZD8         | frizzled class receptor 8                                                         | ns                 | -2.1   | ns     |
|   |   |   | SMAP2        | small ArfGAP2                                                                     | ns                 | ns     | 2.1    |
|   |   |   | CYB5R3       | cytochrome b5 reductase 3                                                         | ns                 | -2.1   | ns     |
|   |   |   | DST          | dystonin                                                                          | ns                 | ns     | 2.1    |
|   |   |   | OXLD1        | oxidoreductase-like domain containing 1                                           | ns                 | -2.1   | ns     |
|   |   |   | LEPROTL1     | leptin receptor overlapping transcript-like 1                                     | ns                 | -2.1   | ns     |
|   |   |   | TAP2         | transporter 2, ATP-binding cassette, sub-family B (MDR                            | ns                 | -2.1   | ns     |
|   |   |   | IGF2R        | insulin-like growth factor 2 receptor                                             | ns                 | -2.1   | ns     |
|   |   |   | POLR2L       | polymerase (RNA) II (DNA directed) polypeptide L, 7.6kDa                          | ns                 | -2.1   | ns     |
|   |   |   | ZNF189       | zinc finger protein 189                                                           | ns                 | ns     | 2.1    |
|   |   |   | MASP1        | mannan-binding lectin serine peptidase 1 (C4                                      | ns                 | -2.1   | ns     |
|   |   |   | CDK14        | cyclin-dependent kinase 14                                                        | ns                 | ns     | 2.1    |
|   |   |   | RASGRP2      | RAS guanyl releasing protein 2 (calcium and DAG-regulated)                        | ns                 | ns     | 2.1    |
|   |   |   | KIR3DL1      | killer cell immunoglobulin-like receptor, three domains, long cytoplasmic tail, 1 | ns                 | ns     | 2.1    |
|   |   |   | FITM2        | fat storage-inducing transmembrane protein 2                                      | ns                 | -2.1   | ns     |
|   |   |   | RNLS         | renalase, FAD-dependent amine oxidase                                             | ns                 | ns     | 2.1    |
|   |   |   | B2M          | beta-2-microglobulin                                                              | ns                 | -2.1   | ns     |
|   |   |   | ACYP2        | acylphosphatase 2, muscle type                                                    | ns                 | ns     | 2.1    |
|   |   |   | RRN3P2       | RRN3 homolog, RNA polymerase I transcription factor pseudogene 2                  | ns                 | ns     | 2.1    |
|   |   |   | SLCO2B1      | solute carrier organic anion transporter family, member 2B1                       | ns                 | ns     | 2.1    |
|   |   |   | CHST3        | carbohydrate (chondroitin 6) sulfotransferase 3                                   | ns                 | -2.1   | ns     |
|   |   |   | LYSMD2       | LysM, putative peptidoglycan-binding, domain containing 2                         | ns                 | ns     | 2.0    |
|   |   |   | NBN          | nibrin                                                                            | ns                 | -2.0   | ns     |
|   |   |   | ME2          | malic enzyme 2, NAD(+)-dependent, mitochondrial                                   | ns                 | -2.0   | ns     |
|   |   |   | ACE          | angiotensin I converting enzyme                                                   | ns                 | ns     | 2.0    |
|   |   |   | ABHD2        | abhydrolase domain containing 2                                                   | ns                 | -2.0   | ns     |
|   |   |   | ENDOD1       | endonuclease domain containing 1                                                  | ns                 | -2.0   | ns     |
|   |   |   | MPC1         | mitochondrial pyruvate carrier 1                                                  | ns                 | -2.0   | ns     |
|   |   |   | FKBP11       | FK506 binding protein 11                                                          | ns                 | -2.0   | ns     |
|   |   |   | SASH3        | SAM and SH3 domain containing 3                                                   | ns                 | ns     | 2.0    |
|   |   |   | RNASEH2C     | ribonuclease H2, subunit C                                                        | ns                 | ns     | 2.0    |
|   |   |   | PDCL3        | phosducin like 3                                                                  | ns                 | -2.0   | ns     |
|   |   |   | RDH10        | retinol dehydrogenase 10 (all-trans)                                              | ns                 | ns     | 2.0    |
|   |   |   | RAB29        | RAB29, member RAS oncogene family                                                 | ns                 | -2.0   | ns     |
|   |   |   | ATL3         | atlastin GTPase 3                                                                 | ns                 | -2.0   | ns     |
|   |   |   | EIF2AK3      | eukaryotic translation initiation factor 2-alpha kinase 3                         | ns                 | -2.0   | ns     |

| S | C | E | Symbol       | Name                                                 | Linear Fold Change |           |           |
|---|---|---|--------------|------------------------------------------------------|--------------------|-----------|-----------|
|   |   |   |              |                                                      | S vs C             | S vs E    | E vs C    |
|   |   |   | LOC105376958 | uncharacterized LOC105376958                         | <i>ns</i>          | -2.0      | <i>ns</i> |
|   |   |   | RASSF4       | Ras association (RalGDS                              | <i>ns</i>          | <i>ns</i> | 2.0       |
|   |   |   | ST6GAL1      | ST6 beta-galactosamide alpha-2,6-sialyltransferase 1 | <i>ns</i>          | <i>ns</i> | 2.0       |
|   |   |   | SAP30        | Sin3A associated protein 30kDa                       | <i>ns</i>          | -2.0      | <i>ns</i> |
|   |   |   | THYN1        | thymocyte nuclear protein 1                          | <i>ns</i>          | -2.0      | <i>ns</i> |
|   |   |   | YBEY         | ybeY metalloproteinase (putative)                    | <i>ns</i>          | -2.0      | <i>ns</i> |
|   |   |   | CD151        | CD151 molecule (Raph blood group)                    | <i>ns</i>          | -2.0      | <i>ns</i> |
|   |   |   | DSTN         | destrin (actin depolymerizing factor)                | <i>ns</i>          | -2.0      | <i>ns</i> |
|   |   |   | ADGRG3       | adhesion G protein-coupled receptor G3               | <i>ns</i>          | <i>ns</i> | 2.0       |
|   |   |   | PNMA1        | paraneoplastic Ma antigen 1                          | <i>ns</i>          | -2.0      | <i>ns</i> |
|   |   |   | CFAP36       | cilia and flagella associated protein 36             | <i>ns</i>          | -2.0      | <i>ns</i> |
|   |   |   | SAPCD1-AS1   | SAPCD1 antisense RNA 1                               | <i>ns</i>          | -2.0      | <i>ns</i> |
|   |   |   | PRICKLE2-AS1 | PRICKLE2 antisense RNA 1                             | <i>ns</i>          | <i>ns</i> | 2.0       |
|   |   |   | SDC3         | syndecan 3                                           | <i>ns</i>          | -2.0      | <i>ns</i> |
|   |   |   | GOLM1        | golgi membrane protein 1                             | <i>ns</i>          | <i>ns</i> | 2.0       |
|   |   |   | PDE4A        | phosphodiesterase 4A, cAMP-specific                  | <i>ns</i>          | -2.0      | <i>ns</i> |

(*ns*=no significant difference)

RMA log<sub>2</sub>  
-5x    x    5x

**Fig. S2.** Syncytiotrophoblast (**S**), Cytotrophoblast (**C**), and Endovascular trophoblast (**E**) differentially expressed genes

| RNA |   |   | Protein |   |   | Symbol     | Name                                                              | Linear Fold Change |     |     |         |     |      |
|-----|---|---|---------|---|---|------------|-------------------------------------------------------------------|--------------------|-----|-----|---------|-----|------|
| S   | C | E | S       | C | E |            |                                                                   | RNA                |     |     | Protein |     |      |
|     |   |   |         |   |   |            |                                                                   | SvC                | SvE | EvC | SvC     | SvE | EvC  |
|     |   |   |         |   |   | GH2        | growth hormone 2                                                  | 12                 | 65  | -6  | 7       | 42  | -6   |
|     |   |   |         |   |   | CSHL1      | chorionic somatomammotropin hormone-like 1                        | 7                  | 5   | -5  | 3       | 7   | -3   |
|     |   |   |         |   |   | KMO        | kynurenine 3-monooxygenase                                        | 5                  | 5   | -5  | 2       | 10  | -6   |
|     |   |   |         |   |   | GPC3       | glypican 3                                                        | 3                  | 4   | -6  | -5      | -4  | -1   |
|     |   |   |         |   |   | HSD11B2    | hydroxysteroid (11-beta) dehydrogenase 2                          | 4                  | 3   | -3  | 19      | 58  | -3   |
|     |   |   |         |   |   | PSG3       | pregnancy specific beta-1-glycoprotein 3                          | 2                  | 3   | -3  | -54     | -32 | -2   |
|     |   |   |         |   |   | C4orf36    | chromosome 4 open reading frame 36                                | 4                  | 3   | -2  | 159     | 13  | 12   |
|     |   |   |         |   |   | CKMT1A     | creatine kinase, mitochondrial 1A                                 | 3                  | 2   | -1  | 10      | 12  | -1   |
|     |   |   |         |   |   | CA8        | carbonic anhydrase VIII                                           | 4                  | 2   | 1   | 4       | 9   | -3   |
|     |   |   |         |   |   | FURIN      | furin (paired basic amino acid cleaving enzyme)                   | 3                  | 2   | -1  | 1       | 8   | -6   |
|     |   |   |         |   |   | AK3        | adenylate kinase 3                                                | 3                  | 1   | 1   | 135     | -1  | 148  |
|     |   |   |         |   |   | ELK1       | ELK1, member of ETS oncogene family                               | 2                  | 1   | -1  | 3       | 23  | -9   |
|     |   |   |         |   |   | IL1RAP     | interleukin 1 receptor accessory protein                          | -5                 | 1   | -2  | -1      | 7   | -7   |
|     |   |   |         |   |   | NOCT       | nocturnin                                                         | -3                 | 0   | -3  | 1       | 10  | -7   |
|     |   |   |         |   |   | GPR82      | G protein-coupled receptor 82                                     | -1                 | 3   | 8   | 35      | -1  | 44   |
|     |   |   |         |   |   | RBP1       | retinol binding protein 1, cellular                               | -2                 | 3   | 3   | 64      | 2   | 28   |
|     |   |   |         |   |   | C1QB       | complement component 1, q subcomponent, B chain                   | -1                 | 2   | 4   | 18      | -1  | 21   |
|     |   |   |         |   |   | CXCL11     | chemokine (C-X-C motif) ligand 11                                 | -1                 | 2   | 3   | -99     | -25 | -4   |
|     |   |   |         |   |   | FBLN2      | fibulin 2                                                         | -1                 | 2   | 2   | -7      | -11 | 1    |
|     |   |   |         |   |   | BMP5       | bone morphogenetic protein 5                                      | 4                  | 6   | -21 | 2       | 62  | -28  |
|     |   |   |         |   |   | CYP19A1    | cytochrome P450, family 19, subfamily A, polypeptide 1            | 2                  | 6   | -29 | 5       | 6   | -1   |
|     |   |   |         |   |   | HSD3B1     | isomerase 1                                                       | 2                  | 5   | -13 | 6       | 30  | -5   |
|     |   |   |         |   |   | DLK1       | delta-like 1 homolog (Drosophila)                                 | 2                  | 4   | -10 | -6      | -3  | -2   |
|     |   |   |         |   |   | CDO1       | cysteine dioxygenase type 1                                       | 2                  | 4   | -10 | 40      | 2   | 22   |
|     |   |   |         |   |   | OLAH       | oleoyl-ACP hydrolase                                              | 2                  | 4   | -6  | -1      | 21  | -26  |
|     |   |   |         |   |   | STS        | steroid sulfatase (microsomal), isozyme S                         | 2                  | 4   | -6  | 11      | 10  | 1    |
|     |   |   |         |   |   | ADAMTS6    | ADAM metalloproteinase with thrombospondin type S6                | 2                  | 4   | -5  | -7      | -2  | -3   |
|     |   |   |         |   |   | ATP6V1C2   | ATPase, H+ transporting, lysosomal 42kDa, V1C2                    | 2                  | 3   | -6  | 4       | 6   | -2   |
|     |   |   |         |   |   | PSG1       | pregnancy specific beta-1-glycoprotein 1                          | 2                  | 3   | -4  | -2      | 64  | -100 |
|     |   |   |         |   |   | SPDYA      | speedy                                                            | 1                  | 3   | -5  | 64      | 3   | 19   |
|     |   |   |         |   |   | SLC38A1    | solute carrier family 38, member 1                                | 1                  | 2   | -3  | 42      | 2   | 17   |
|     |   |   |         |   |   | SLC2A1     | solute carrier family 2A1 (facilitated glucose transporter)       | -1                 | 2   | -4  | 2       | 7   | -4   |
|     |   |   |         |   |   | CLN3       | ceroid-lipofuscinosis, neuronal 3                                 | -1                 | 1   | -4  | 28      | 2   | 18   |
|     |   |   |         |   |   | SLC29A1    | solute carrier family 29A1 (equilibrative nucleoside transporter) | -2                 | 1   | -4  | -13     | -17 | 1    |
|     |   |   |         |   |   | UBE2C      | ubiquitin-conjugating enzyme E2C                                  | 1                  | 1   | -2  | 93      | 8   | 12   |
|     |   |   |         |   |   | ADK        | adenosine kinase                                                  | -1                 | 1   | -2  | 2       | 82  | -45  |
|     |   |   |         |   |   | ZNF808     | zinc finger protein 808                                           | 1                  | 1   | -2  | -1      | 118 | -119 |
|     |   |   |         |   |   | PRG2       | proteoglycan 2, bone marrow (natural killer cell activator)       | -66                | 6   | 1   | -10     | -7  | -1   |
|     |   |   |         |   |   | ISG15      | ISG15 ubiquitin-like modifier                                     | -12                | 4   | 1   | -2      | 23  | -40  |
|     |   |   |         |   |   | HSPG2      | heparan sulfate proteoglycan 2                                    | -12                | 3   | -1  | -9      | -4  | -2   |
|     |   |   |         |   |   | RFPL4B     | ret finger protein-like 4B                                        | -8                 | 3   | 1   | 1241    | 3   | 475  |
|     |   |   |         |   |   | FN1        | fibronectin 1                                                     | -7                 | 2   | -1  | -35     | -11 | -3   |
|     |   |   |         |   |   | IFIT1      | interferon-induced protein with tetratricopeptide repeats 1       | -5                 | 3   | 1   | -6      | -4  | -2   |
|     |   |   |         |   |   | CD276      | CD276 molecule                                                    | -5                 | 2   | -1  | -70     | -9  | -8   |
|     |   |   |         |   |   | LAYN       | layilin                                                           | -3                 | 2   | 2   | 2       | 40  | -21  |
|     |   |   |         |   |   | ST6GALNAC2 | ST6 N-Acetylgalactosaminide Alpha-2,6-Sialyltransferase 2         | -4                 | 2   | 1   | -6      | 2   | -15  |
|     |   |   |         |   |   | KRT19      | keratin 19, type I                                                | -4                 | 1   | -2  | -1      | 4   | -5   |
|     |   |   |         |   |   | LY6K       | lymphocyte antigen 6 complex, locus K                             | -4                 | 1   | -2  | -116    | -36 | -3   |
|     |   |   |         |   |   | FHL2       | four and a half LIM domains 2                                     | -3                 | 1   | -1  | -40     | -44 | 1    |
|     |   |   |         |   |   | FAM110A    | family with sequence similarity 110, member A                     | -3                 | 1   | -1  | -3      | 18  | -52  |
|     |   |   |         |   |   | GTPBP1     | GTP binding protein 1                                             | -2                 | 1   | 1   | -2      | 3   | -6   |
|     |   |   |         |   |   | ADAM15     | ADAM metalloproteinase domain 15                                  | -2                 | 1   | -1  | -6      | 8   | -47  |
|     |   |   |         |   |   | LASP1      | LIM and SH3 protein 1                                             | -2                 | 1   | 1   | 23      | -1  | 31   |



| RNA |   |   | Protein |   |   | Symbol   | Name                                                                     | Linear Fold Change |     |     |         |      |      |
|-----|---|---|---------|---|---|----------|--------------------------------------------------------------------------|--------------------|-----|-----|---------|------|------|
| S   | C | E | S       | C | E |          |                                                                          | RNA                |     |     | Protein |      |      |
|     |   |   |         |   |   |          |                                                                          | SvC                | SvE | EvC | SvC     | SvE  | EvC  |
|     |   |   |         |   |   | ACTA2    | actin, alpha 2, smooth muscle, aorta                                     | 4                  | 0   | 5   | 4       | 1763 | -397 |
|     |   |   |         |   |   | IDO1     | indoleamine 2,3-dioxygenase 1                                            | 4                  | 0   | 5   | 59      | 3    | 17   |
|     |   |   |         |   |   | TCF4     | transcription factor 4                                                   | 4                  | 0   | 4   | 2       | 7    | -4   |
|     |   |   |         |   |   | EAF2     | ELL associated factor 2                                                  | 3                  | 0   | 3   | 35      | 3    | 12   |
|     |   |   |         |   |   | PSG11    | pregnancy specific beta-1-glycoprotein 11                                | 2                  | 3   | -3  | 5       | 45   | -9   |
|     |   |   |         |   |   | GH1      | growth hormone 1                                                         | 2                  | 2   | -2  | 138     | 138  | -1   |
|     |   |   |         |   |   | PBK      | PDZ binding kinase                                                       | 1                  | 2   | -3  | 113     | 10   | 11   |
|     |   |   |         |   |   | RBMS3    | RNA binding motif, single stranded interacting protein 3                 | 2                  | 2   | -2  | 5       | 94   | -20  |
|     |   |   |         |   |   | TFRC     | transferrin receptor                                                     | 2                  | 2   | -2  | 8       | 12   | -1   |
|     |   |   |         |   |   | NPIP4    | nuclear pore complex interacting protein family B4                       | 2                  | 2   | -2  | 66      | 11   | 6    |
|     |   |   |         |   |   | DVL3     | dishevelled segment polarity protein 3                                   | 2                  | 2   | -2  | 4       | 8    | -2   |
|     |   |   |         |   |   | STX3     | syntaxin 3                                                               | 2                  | 2   | -2  | 2       | 45   | -22  |
|     |   |   |         |   |   | PDXDC2P  | pyridoxal-dependent decarboxylase domain containing 2, pseudogene        | 1                  | 2   | -2  | 25      | 3    | 9    |
|     |   |   |         |   |   | BTG2     | BTG family, member 2                                                     | 3                  | 1   | 1   | 5       | 30   | -6   |
|     |   |   |         |   |   | BCL2     | B-cell CLL                                                               | 3                  | 1   | 1   | 2       | 5    | -3   |
|     |   |   |         |   |   | AUNIP    | aurora kinase A and ninein interacting protein                           | 2                  | 2   | -2  | 10      | 5    | 2    |
|     |   |   |         |   |   | TOMM34   | translocase of outer mitochondrial membrane 34                           | 1                  | 2   | -2  | 30      | -2   | 63   |
|     |   |   |         |   |   | RGPD3    | RANBP2-like and GRIP domain containing 3                                 | 1                  | 1   | -2  | 2       | 67   | -38  |
|     |   |   |         |   |   | H2BC21   | H2B clustered histone 21                                                 | 1                  | 1   | -2  | 3       | 5    | -2   |
|     |   |   |         |   |   | SLAIN1   | SLAIN motif family member 1                                              | 3                  | 1   | 2   | -1      | 7    | -8   |
|     |   |   |         |   |   | SLC2A11  | solute carrier family 2A11 (facilitated glucose transporter)             | 1                  | 1   | -2  | -2      | 26   | -54  |
|     |   |   |         |   |   | TAF4B    | TATA-Box Binding Protein Associated Factor 4b                            | 1                  | 1   | -2  | 2       | 13   | -6   |
|     |   |   |         |   |   | MGST3    | microsomal glutathione S-transferase 3                                   | 1                  | 1   | -2  | 12      | 2    | 6    |
|     |   |   |         |   |   | TIGD2    | tigger transposable element derived 2                                    | 1                  | 1   | -2  | 2       | 11   | -7   |
|     |   |   |         |   |   | SIAH2    | siah E3 ubiquitin protein ligase 2                                       | 2                  | 1   | -1  | 37      | 2    | 24   |
|     |   |   |         |   |   | TLK1     | tousled-like kinase 1                                                    | 1                  | 1   | -2  | 40      | 1    | 31   |
|     |   |   |         |   |   | HNRNPD   | heterogeneous nuclear ribonucleoprotein D                                | 1                  | 1   | -2  | 118     | 8    | 15   |
|     |   |   |         |   |   | NPIPA5   | nuclear pore complex interacting protein family A5                       | 2                  | 1   | -1  | 35      | 35   | -1   |
|     |   |   |         |   |   | TCTEX1D4 | Tctex1 domain containing 4                                               | 1                  | 1   | -2  | 2       | 28   | -15  |
|     |   |   |         |   |   | PGPEP1   | pyroglutamyl-peptidase I                                                 | -4                 | 1   | -2  | -150    | -34  | -4   |
|     |   |   |         |   |   | PANX1    | pannexin 1                                                               | -3                 | 1   | -2  | -108    | -17  | -7   |
|     |   |   |         |   |   | ELF4     | E74-like factor 4 (ets domain transcription factor)                      | -3                 | 1   | -2  | -1      | 23   | -34  |
|     |   |   |         |   |   | RAB25    | RAB25, member RAS oncogene family                                        | -1                 | 1   | -3  | 2       | 47   | -21  |
|     |   |   |         |   |   | CYB5R1   | cytochrome b5 reductase 1                                                | -1                 | 1   | -2  | 5       | 152  | -29  |
|     |   |   |         |   |   | ACVR2B   | activin A receptor type IIB                                              | -1                 | 1   | -2  | -36     | -17  | -2   |
|     |   |   |         |   |   | TM4SF5   | transmembrane 4 L six family member 5                                    | -3                 | 3   | 2   | 57      | 2    | 27   |
|     |   |   |         |   |   | GPR65    | G protein-coupled receptor 65                                            | 1                  | 2   | 5   | 133     | 2    | 68   |
|     |   |   |         |   |   | CD82     | CD82 molecule                                                            | -1                 | 2   | 4   | 23      | -2   | 50   |
|     |   |   |         |   |   | PLEK     | pleckstrin                                                               | 2                  | 1   | 4   | -129    | -45  | -3   |
|     |   |   |         |   |   | GDAP1    | ganglioside induced differentiation associated protein 1                 | 2                  | 1   | 4   | 45      | 1    | 33   |
|     |   |   |         |   |   | SLC30A4  | solute carrier family 30 (zinc transporter), member 4                    | -3                 | 2   | 1   | 64      | 2    | 31   |
|     |   |   |         |   |   | MGAT2    | mannosyl (alpha-1,6-)-glycoprotein b-1,2-N-acetylglucosaminyltransferase | -2                 | 2   | 2   | 35      | 1    | 26   |
|     |   |   |         |   |   | BTN3A2   | butyrophilin, subfamily 3, member A2                                     | 2                  | 1   | 3   | -31     | -74  | 2    |
|     |   |   |         |   |   | C4B      | complement component 4B (Chido blood group)                              | -1                 | 1   | 2   | 112     | 2    | 52   |
|     |   |   |         |   |   | CPEB2    | cytoplasmic polyadenylation element binding protein 2                    | -2                 | 1   | 1   | -46     | -31  | -1   |
|     |   |   |         |   |   | CYTIP    | cytohesin 1 interacting protein                                          | -1                 | 1   | 2   | -126    | -68  | -2   |
|     |   |   |         |   |   | LGALS3   | lectin, galactoside-binding, soluble, 3                                  | -2                 | 1   | 1   | -6      | -6   | 1    |
|     |   |   |         |   |   | GPR4     | G protein-coupled receptor 4                                             | 1                  | 1   | 2   | 62      | 2    | 27   |
|     |   |   |         |   |   | ACYP2    | acylphosphatase 2, muscle type                                           | 1                  | 1   | 2   | 11      | -5   | 55   |

RMA log<sub>2</sub>

-5x      5x

TMM log<sub>2</sub>

0      12

**Fig. S3.** Syncytiotrophoblast (**S**), Cytotrophoblast (**C**), and Endovascular trophoblast (**E**) coordinately differentially expressed genes and proteins

**Table S1. Antibodies**

| Antigen                                   | Catalog number/<br>clone | Source                 | Species | Concentration<br>( $\mu\text{g/ml}$ ) |
|-------------------------------------------|--------------------------|------------------------|---------|---------------------------------------|
| NTS                                       | ab172114                 | Abcam                  | Rabbit  | 10                                    |
| C4ORF36                                   | ab23703                  | Abcam                  | Rabbit  | 2                                     |
| PGPEP1                                    | ab220735                 | Abcam                  | Rabbit  | 0.5                                   |
| CNR1                                      | ab23703                  | Abcam                  | Rabbit  | 4                                     |
| CK7                                       | 7D3                      | Damsky et al., 1992    | Rat     | 26                                    |
| FITC-conjugated anti-<br>mouse secondary  | 715-095-151              | Jackson ImmunoResearch | Donkey  | 15                                    |
| FITC-conjugated anti-<br>rabbit secondary | 711-095-152              | Jackson ImmunoResearch | Donkey  | 15                                    |
| TRITC-conjugated<br>anti-rat secondary    | 712-025-153              | Jackson ImmunoResearch | Donkey  | 15                                    |

**Table S2. Cannabinoid Receptor Agonists and Antagonists**

| Compound               | CAS Registry No | Tocris Cat. No. | Target                              |
|------------------------|-----------------|-----------------|-------------------------------------|
| (R)-(+)-Methanandamide | 157182-49-5     | 1782            | CB <sub>1</sub> Agonist             |
| AM 251                 | 183232-66-8     | 1117            | CB <sub>1</sub> Receptor Antagonist |
| JWH 133                | 259869-55-1     | 1343            | CB <sub>2</sub> Agonist             |
| AM 630                 | 164178-33-0     | 1120            | CB <sub>2</sub> Inverse Agonist     |
